# Supplementary material for: HTLV-1 Integration into Transcriptionally Active Genomic Regions Is Associated with Proviral Expression and with HAM/TSP
Source: PubMed Central journal article supplement (PMC2265437; doi:10.1371/journal.ppat.1000027), 2008-03-21
Supplement: ppat.1000027.s003.pdf [file ppat.1000027.s003.pdf]

# Association of Genomic Features with Integration

June 22, 2007

## Contents

|          |                                                                   |           |
|----------|-------------------------------------------------------------------|-----------|
| <b>1</b> | <b>Introduction</b>                                               | <b>2</b>  |
| <b>2</b> | <b>Preference for Genes</b>                                       | <b>3</b>  |
| 2.1      | Acembly Genes . . . . .                                           | 3         |
| 2.2      | refGenes . . . . .                                                | 5         |
| 2.3      | ensGenes . . . . .                                                | 7         |
| 2.4      | genScan Genes . . . . .                                           | 9         |
| 2.5      | uniGenes . . . . .                                                | 11        |
| 2.6      | oncogenes . . . . .                                               | 13        |
| <b>3</b> | <b>CpG Island Neighborhoods</b>                                   | <b>14</b> |
| 3.1      | 1 kilobase neighborhoods . . . . .                                | 14        |
| 3.2      | 5 kilobase neighborhoods . . . . .                                | 15        |
| 3.3      | 10 kilobase neighborhoods . . . . .                               | 16        |
| 3.4      | 25 kilobase neighborhoods . . . . .                               | 17        |
| 3.5      | 50 kilobase neighborhoods . . . . .                               | 18        |
| <b>4</b> | <b>Gene Density, Expression 'Density', and CpG Island Density</b> | <b>19</b> |
| 4.1      | 25 kiloBase Window . . . . .                                      | 20        |
| 4.2      | 50 kiloBase Window . . . . .                                      | 26        |
| 4.3      | 100 kilobase Window . . . . .                                     | 31        |
| 4.4      | 100 kiloBase Window . . . . .                                     | 35        |
| 4.5      | 250 kiloBase Window . . . . .                                     | 40        |
| 4.6      | 500 kilobase Window . . . . .                                     | 45        |
| 4.7      | 500 kiloBase Window . . . . .                                     | 49        |
| 4.8      | 1 megabase Window . . . . .                                       | 54        |
| 4.9      | 1 megaBase Window . . . . .                                       | 58        |
| 4.10     | 2 megabase Window . . . . .                                       | 63        |
| 4.11     | 2 megaBase Window . . . . .                                       | 67        |
| 4.12     | 4 megaBase Window . . . . .                                       | 72        |
| 4.13     | 8 megaBase Window . . . . .                                       | 77        |
| 4.14     | 16 megaBase Window . . . . .                                      | 82        |
| 4.15     | 32 megaBase Window . . . . .                                      | 87        |

|          |                                                        |            |
|----------|--------------------------------------------------------|------------|
| <b>5</b> | <b>Juxtaposition with Gene Start and End Positions</b> | <b>92</b>  |
| 5.1      | Acembly Annotations . . . . .                          | 92         |
| 5.2      | RefSeq Annotations . . . . .                           | 96         |
| 5.3      | genScan Annotations . . . . .                          | 100        |
| 5.4      | uniGene Annotations . . . . .                          | 104        |
| <b>6</b> | <b>GC content</b>                                      | <b>108</b> |
| <b>7</b> | <b>Cytobands</b>                                       | <b>125</b> |

# 1 Introduction

In this document, I examine the association of integration siting with various genomic features.

The numbers are shown below:

```
Origin.of.data.set
  MRC-inVivo Meekings-inVivo
          3110           313
```

The distribution of relative frequency of insertions across the chromosomes is given in this barplot:

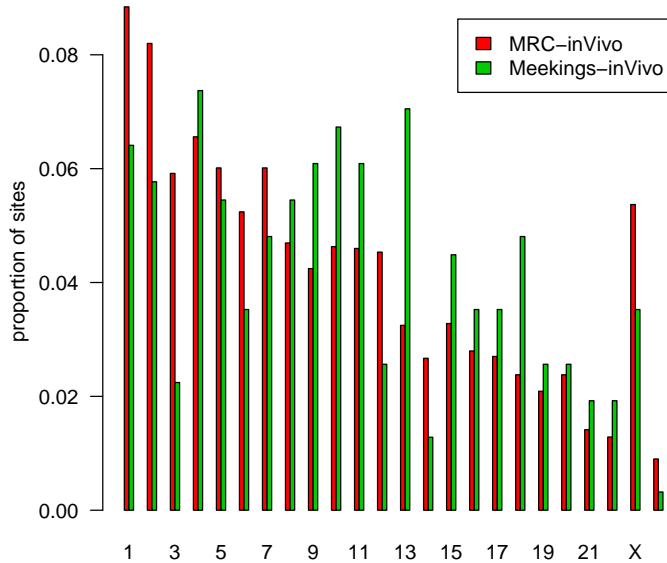

Are there chromosomes that are particularly favored for integration by one group over the other? This was tested for statistical significance. The test performed used the likelihood ratio statistic for the logistic regression model (reviewed in [1]) as implemented by the `glm` function of R using the `binomial` family. The null hypothesis tested is the ratio of true integration events in the two groups is constant across all chromosomes. This test attains a p-value of 0.0011709.

## 2 Preference for Genes

### 2.1 Acembly Genes

Here we examine the relative preference that integration events in the two groups have for genes. In the following plot we show the relative frequency of integrations in genes according to the 'Acembly' anotation. The bars grouped over the label "In Gene" give the relative frequency of integration events (compared to control sites) between bases located within Acembly gene annotations, while the label "Not in Gene" give the relative frequency of integration events (compared to control sites) between bases not located within Acembly gene annotations.

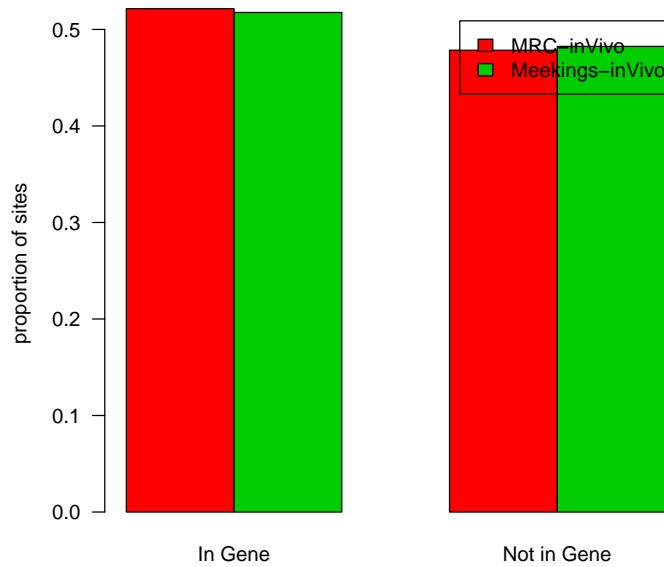

Is there is a difference in the tendency for insertions to occur in genes? A formal test of significance yields a p-value of 0.89336. In the following plot we show the relative frequency of insertions in exons according to the 'Acembly' anotation. The bars grouped over the label "In Exon" give the relative frequency of integration events (compared to control sites) between bases located in exons according to the Acembly annotation, while the label "Not in Exon" give the relative frequency of integration events (compared to control sites) between bases not located in exons according to the Acembly gene annotation.

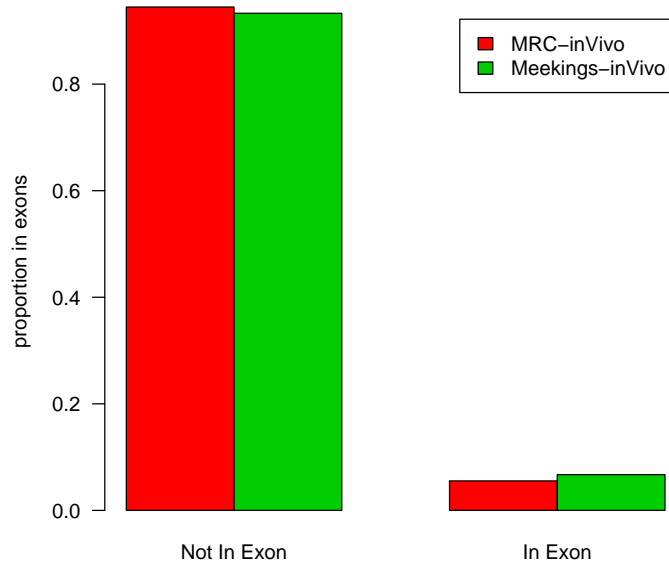

Here is the table of coefficients of the log ratio of intensities along with their standard errors, z statistics, and p-values:

|             | coef    | se     | z       | p         |
|-------------|---------|--------|---------|-----------|
| (Intercept) | -2.2900 | 0.0854 | -26.800 | 4.47e-158 |
| in.gene     | -0.0427 | 0.1230 | -0.347  | 7.28e-01  |
| in.exon     | 0.2280  | 0.2470 | 0.920   | 3.58e-01  |

The model on which these coefficients are based include terms for whether the site is in a gene or not. Thus, the effect shown as 'in.exon' is net of that due to being in a gene. Note that in the barplot above the 'Not in Exon' bars include the both introns and intergenic regions, so the impression given by the table may differ from that for the barplot.

## 2.2 refGenes

Here we examine the relative preference that insertions of the two types have for genes. In the following plot we show the relative frequency of insertions in genes according to the 'refGene' annotation.

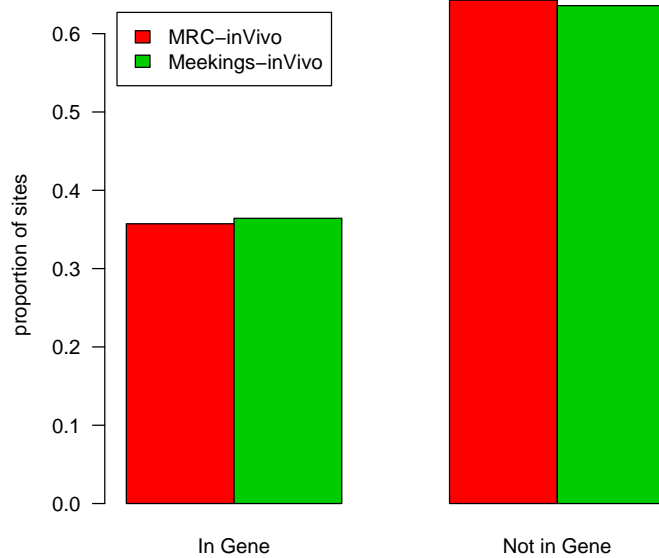

Is there is a tendency for insertions to occur in genes? A formal test of significance yields a p-value of 0.80619.

In the following plot we show the relative frequency of insertions in exons according to the 'refGene' annotation.

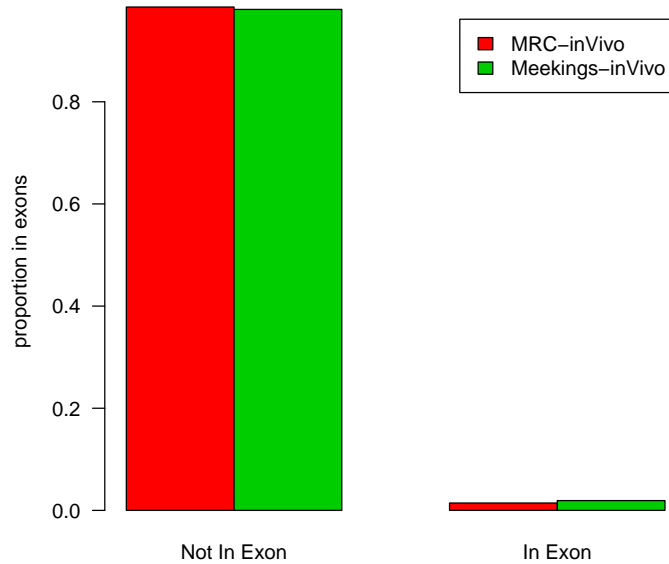

Here is the table of coefficients of the log ratio of intensities for along with their standard errors, z statistics, and p-values:

|             | coef    | se     | z       | p         |
|-------------|---------|--------|---------|-----------|
| (Intercept) | -2.3100 | 0.0743 | -31.000 | 1.69e-211 |
| in.gene     | 0.0176  | 0.1250 | 0.140   | 8.89e-01  |
| in.exon     | 0.2750  | 0.4460 | 0.616   | 5.38e-01  |

The model on which these coefficients are based include terms for whether the site is in a gene or not. Thus, the effect shown as 'in.exon' is net of that due to being in a gene. Note that in the barplot above the 'Not in Exon' bars include the both introns and intergenic regions, so the impression given by the table may differ from that for the barplot.

### 2.3 ensGenes

Here we examine the relative preference that insertions of the two types have for genes. In the following plot we show the relative frequency of insertions in genes according to the 'ensGene' annotation.

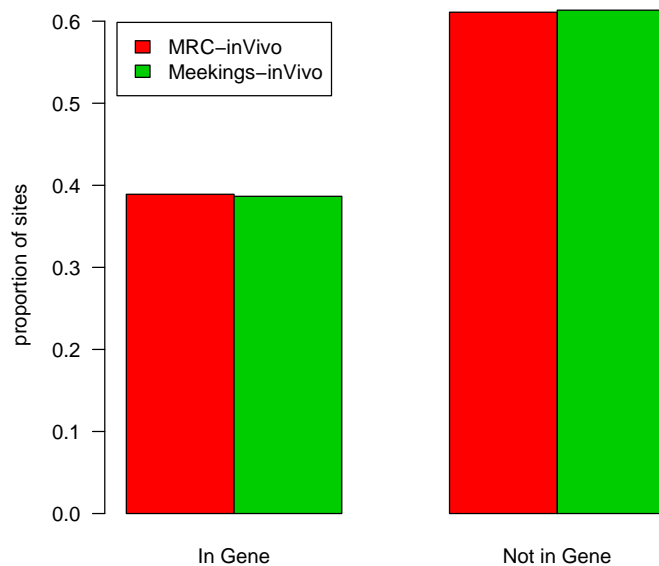

Is there is a tendency for insertions to occur in genes? A formal test of significance yields a p-value of 0.93144.

In the following plot we show the relative frequency of insertions in exons according to the 'ensGene' annotation.



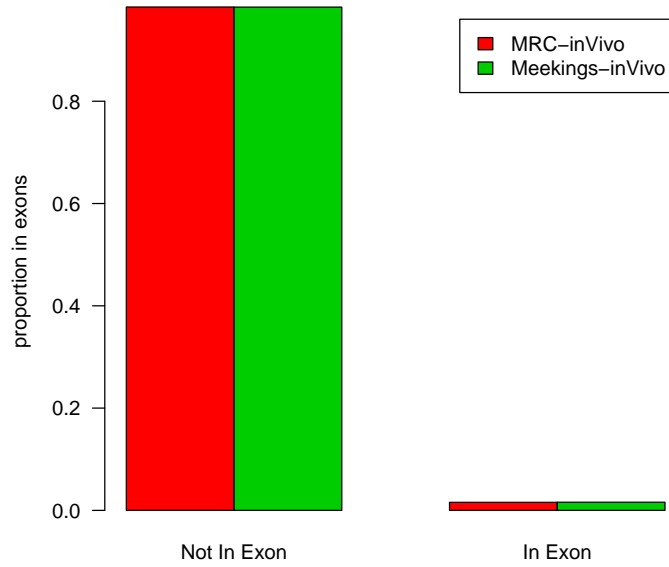

Here is the table of coefficients of the log ratio of intensities for along with their standard errors, z statistics, and p-values:

|             | coef    | se     | z        | p         |
|-------------|---------|--------|----------|-----------|
| (Intercept) | -2.2900 | 0.0757 | -30.3000 | 3.03e-201 |
| in.gene     | -0.0113 | 0.1230 | -0.0919  | 9.27e-01  |
| in.exon     | 0.0211  | 0.4790 | 0.0439   | 9.65e-01  |

The model on which these coefficients are based include terms for whether the site is in a gene or not. Thus, the effect shown as 'in.exon' is net of that due to being in a gene. Note that in the barplot above the 'Not in Exon' bars include the both introns and intergenic regions, so the impression given by the table may differ from that for the barplot.

## 2.4 genScan Genes

Here we examine the preference that insertions have for genes. In the following plot we show the relative frequency of insertions in genes according to the 'genScan' annotation.

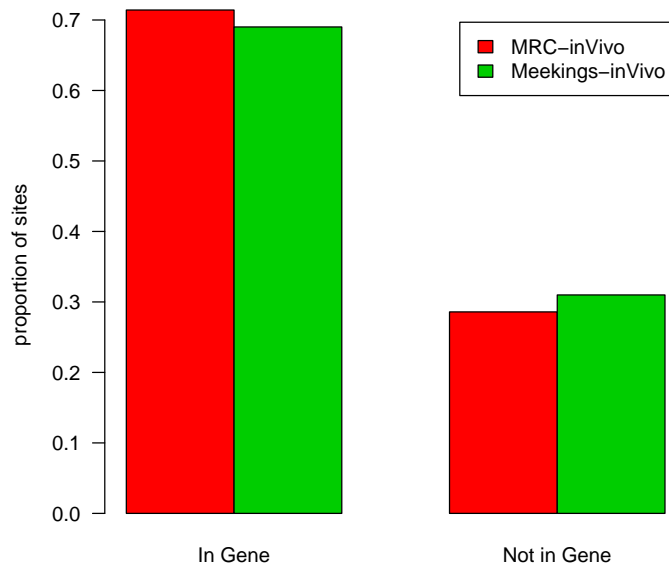

Is there is a tendency for insertions to occur in genes? A formal test of significance yields a p-value of 0.37354.

In the following plot we show the relative frequency of insertions in exons according to the 'genScan' annotation.

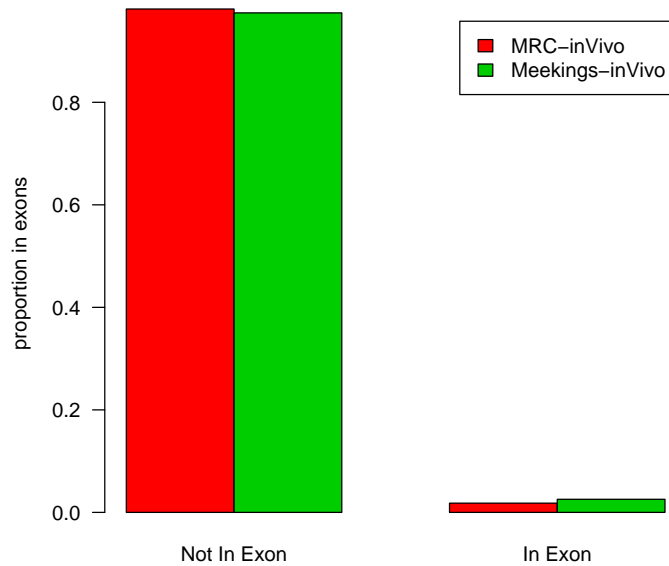

Here is the table of coefficients of the log ratio of intensities along with their standard errors, z statistics, and p-values:

|             | coef   | se    | z       | p        |
|-------------|--------|-------|---------|----------|
| (Intercept) | -2.220 | 0.107 | -20.700 | 2.38e-95 |
| in.gene     | -0.127 | 0.129 | -0.985  | 3.25e-01 |
| in.exon     | 0.397  | 0.385 | 1.030   | 3.03e-01 |

The model on which these coefficients are based include terms for whether the site is in a gene or not. Thus, the effect shown as 'in.exon' is net of that due to being in a gene. Note that in the barplot above the 'Not in Exon' bars include the both introns and intergenic regions, so the impression given by the table may differ from that for the barplot.

## 2.5 uniGenes

Here we examine the preference that insertions have for genes. In the following plot we show the relative frequency of insertions in genes according to the 'uniGene' annotation.

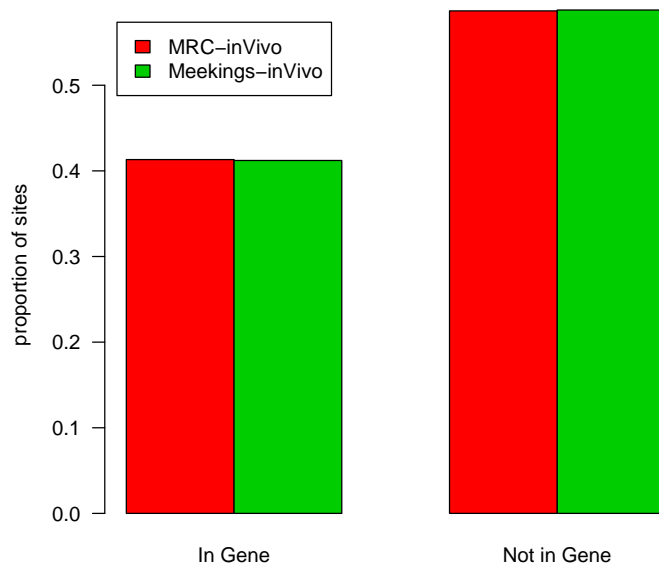

Is there is a tendency for insertions to occur in genes? A formal test of significance yields a p-value of 0.97151.

In the following plot we show the relative frequency of insertions in exons according to the 'uniGene' annotation.

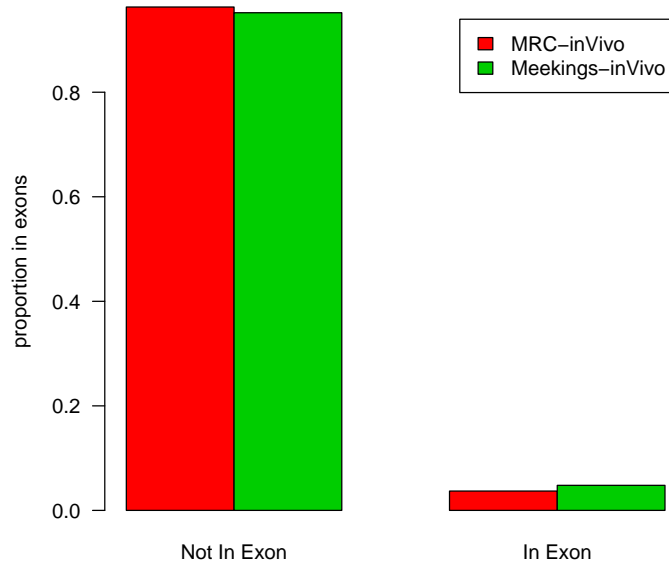

Here is the table of coefficients of the log ratio of intensities along with their standard errors, z statistics, and p-values:

|             | coef    | se     | z       | p         |
|-------------|---------|--------|---------|-----------|
| (Intercept) | -2.2900 | 0.0773 | -29.700 | 2.29e-193 |
| in.gene     | -0.0342 | 0.1250 | -0.273  | 7.85e-01  |
| in.exon     | 0.2920  | 0.2920 | 1.000   | 3.17e-01  |

The model on which these coefficients are based include terms for whether the site is in a gene or not. Thus, the effect shown as 'in.exon' is net of that due to being in a gene. Note that in the barplot above the 'Not in Exon' bars include the both introns and intergenic regions, so the impression given by the table may differ from that for the barplot.

## 2.6 oncogenes

Here we examine the preference that insertions have for oncogenes. In the following plot we show the relative frequency of insertions within 50kb of an oncogene 5' end.

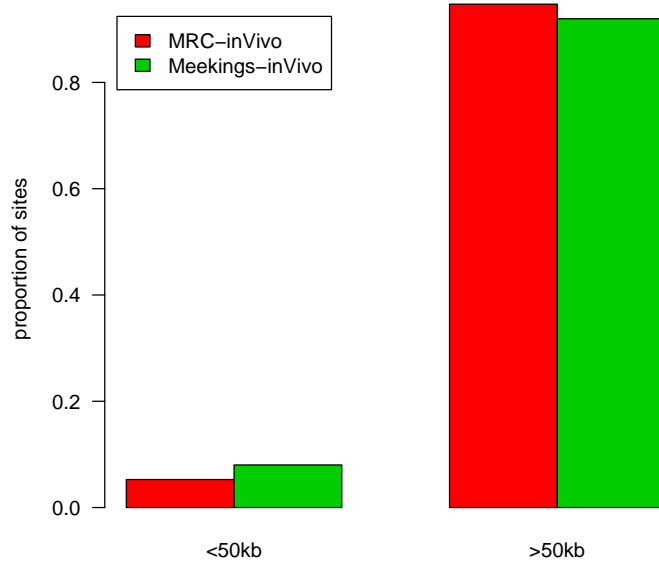

It seems evident that there is a strong tendency for insertions to occur near oncogenes. A formal test of significance bears this out with a p-value of 0.055964.

Here is the table of coefficients of the log ratio of intensities for true insertion sites versus control insertion sites along with their standard errors, z statistics, and p-values for each data set:

|                    | coef   | se     | z     | p      |
|--------------------|--------|--------|-------|--------|
| (Intercept)        | -2.330 | 0.0618 | -37.7 | 0.0000 |
| eval(the.gene)TRUE | 0.448  | 0.2230 | 2.0   | 0.0451 |

### 3 CpG Island Neighborhoods

Here we study the effect of being in the neighborhood of CpG Islands. Following Wu et al [2], who found that the neighborhoods within  $\pm 1\text{kb}$  of CpG islands are enriched for MLV insertions, we study such neighborhoods.

#### 3.1 1 kilobase neighborhoods

The following plot shows the effect of being in or within  $\pm 1\text{kb}$  of a CpG island:

NULL

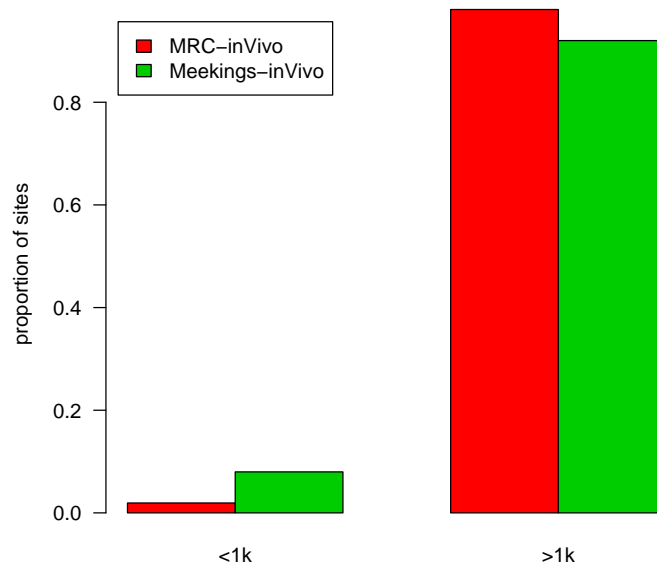

A formal test of significance comparing the difference attains a p-value of  $6.4805e - 08$ .

### 3.2 5 kilobase neighborhoods

The following plot shows the effect of being in or within  $\pm 5\text{kb}$  of a CpG island:

NULL

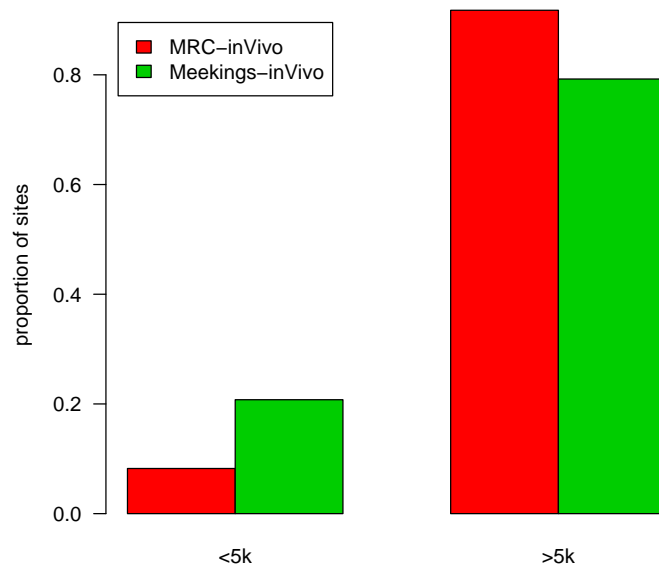

A formal test of significance comparing the difference attains a p-value of  $1.0465e - 10$ .



### 3.3 10 kilobase neighborhoods

The following plot shows the effect of being in or within  $\pm 10$ kb of a CpG island:

NULL

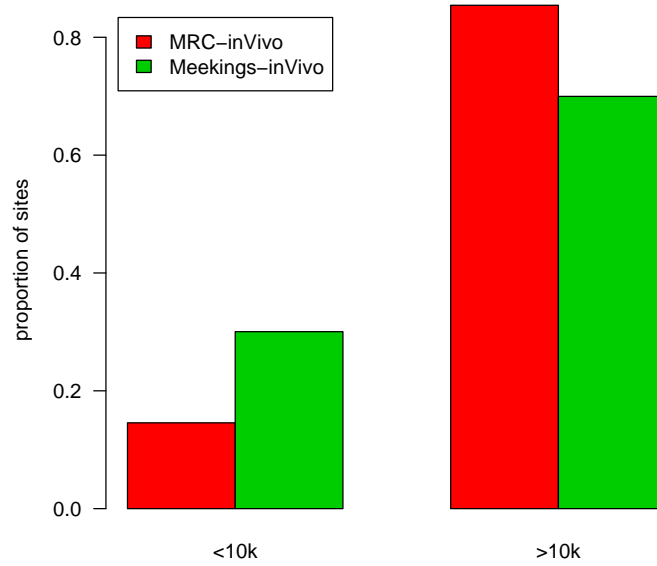

A formal test of significance comparing the difference attains a p-value of  $4.9409e - 11$ .

### 3.4 25 kilobase neighborhoods

The following plot shows the effect of being in or within  $\pm 25$ kb of a CpG island:

NULL

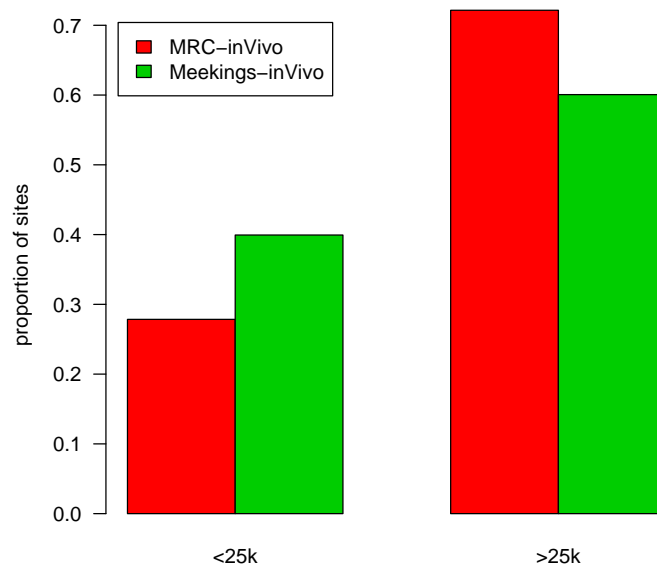

A formal test of significance comparing the difference attains a p-value of  $1.2228e - 05$ .

### 3.5 50 kilobase neighborhoods

The following plot shows the effect of being in or within  $\pm 50$ kb of a CpG island:

NULL

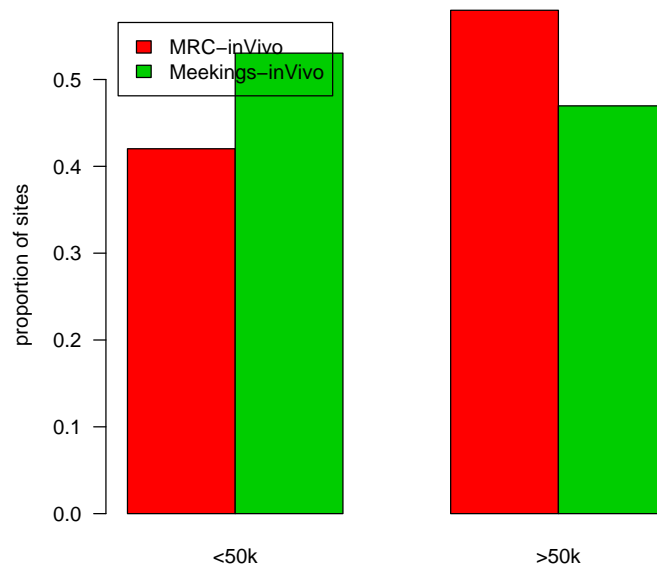

A formal test of significance comparing the difference attains a p-value of 0.00019175.

## 4 Gene Density, Expression 'Density', and CpG Island Density

In this section the association with gene density is examined. The 'genes' that are counted are the genes represented on the microarray. In addition, we the number of such genes expressed at various levels. The levels are

**low.ex** Count genes whose expression is in the upper half and divide by number of bases

**med.ex** Count genes whose expression is in the upper half  $1/8^{th}$  and divide by number of bases

**high.ex** Count genes whose expression is in the upper half  $1/16^{th}$  and divide by number of bases

The bolded terms are used as abbreviations in what follows. The abbreviation **dens** is used to indicate gene density as number of genes per base.

## 4.1 25 kiloBase Window

In the barplot that follows we examine the association of insertion sites with gene density in a 25 kilobase window surrounding each locus. More such plots will follow and the method of their construction is always to try to divide the data according to the deciles of density. However, it often happens that there is a very skewed distribution of density and often even the 90<sup>th</sup> percentile is zero. In that case, the barplots simply show the sites for which the density is zero and those for which it is non-zero. If there are fewer than ten groups of bars, then the groupings contain ten percent of the sites each except for the leftmost grouping which will contain all of the remaining sites.

Also note that the title of the plot contains clues as to its content; the prefix indicates the type of variable studied while the suffix indicates the window width in the number of bases. The p-value given is the result of fitting a cubic polynomial to the gene density values.

The following expression data and probe set were used for this report:

```
[1] "Jurkat-HU133Plus2"
```

```
[1] "HG-U133"
```

```
Category limits
```

|   | lower      | category | upper     |
|---|------------|----------|-----------|
| 1 | -0.2551140 | group.1  | 0.6040327 |
| 2 | 0.6040327  | group.2  | 0.7632963 |
| 3 | 0.7632963  | group.3  | 0.9997078 |

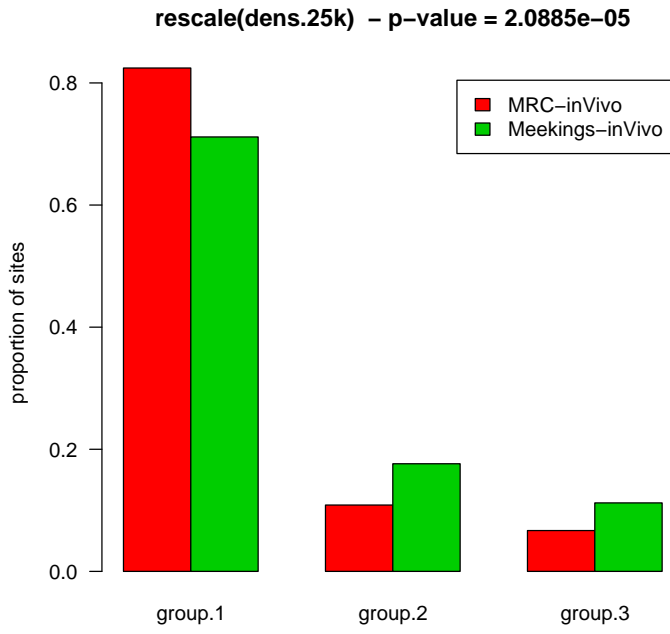

Here are the results for expression density. First, we count just genes that are in the upper half.

Category limits

|   | lower      | category | upper     |
|---|------------|----------|-----------|
| 1 | -0.1417300 | group.1  | 0.7925190 |
| 2 | 0.7925190  | group.2  | 0.9994155 |

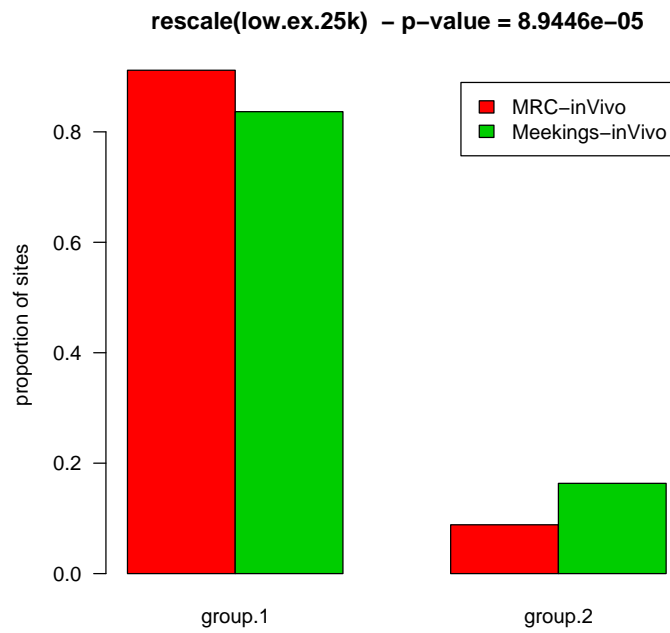

Now we count genes in the upper 1/8<sup>th</sup>:

Category limits

|   | lower     | category | upper     |
|---|-----------|----------|-----------|
| 1 | -0.078609 | group.1  | 0.8930450 |
| 2 | 0.893045  | group.2  | 0.9997078 |

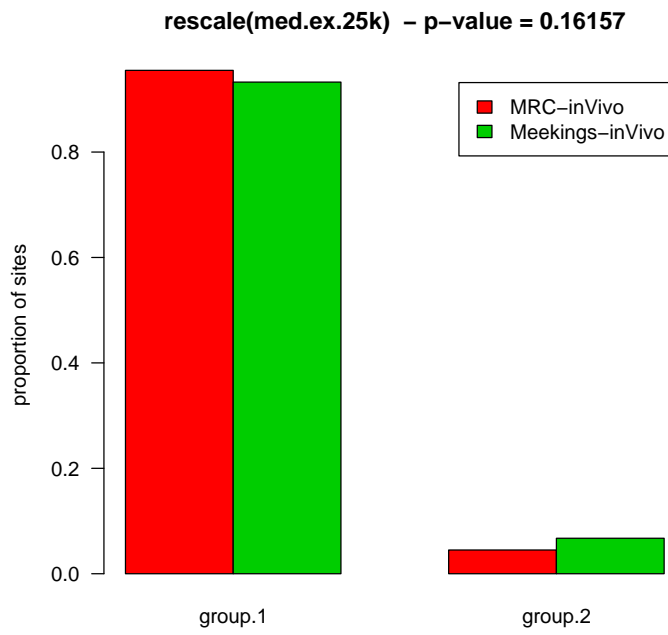



And here we count genes in the upper 1/16<sup>th</sup>:

Category limits

|   | lower       | category | upper     |
|---|-------------|----------|-----------|
| 1 | -0.04441847 | group.1  | 0.9450614 |
| 2 | 0.94506137  | group.2  | 0.9997078 |

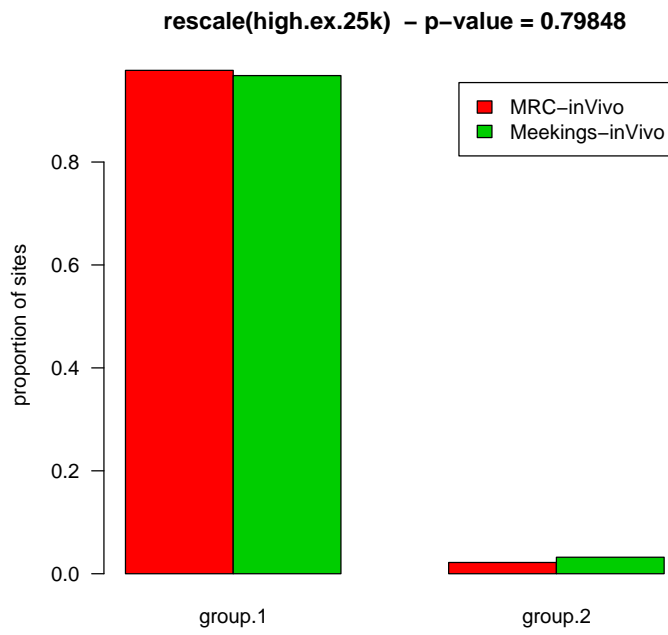

Here the effect of density of CpG islands is studied:

Category limits

|   | lower      | category | upper     |
|---|------------|----------|-----------|
| 1 | -0.2857978 | group.1  | 0.6019871 |
| 2 | 0.6019871  | group.2  | 0.8369375 |
| 3 | 0.8369375  | group.3  | 0.9997078 |

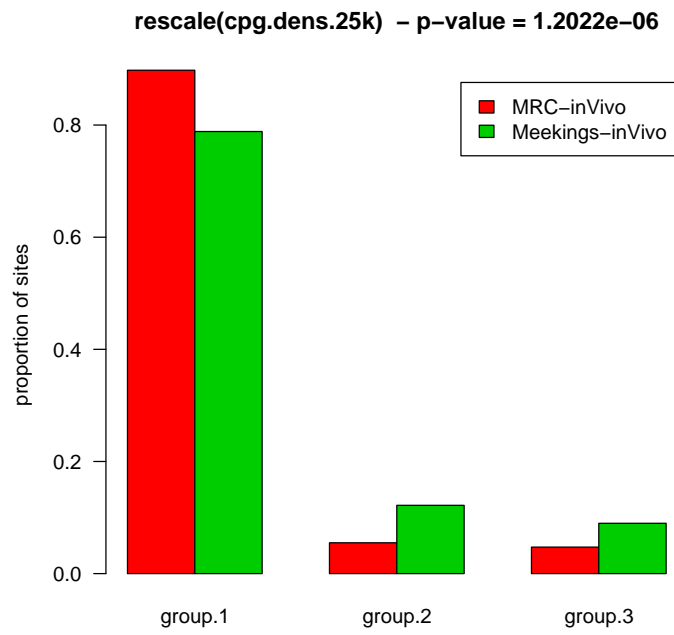

## 4.2 50 kiloBase Window

In the barplot that follows we examine the association of insertion sites with expression density in a 50 kilobase window surrounding each locus. First, we count just the number of genes on the represented on the chip.

Category limits

|   | lower      | category | upper     |
|---|------------|----------|-----------|
| 1 | -0.3924605 | group.1  | 0.4021333 |
| 2 | 0.4021333  | group.2  | 0.5558153 |
| 3 | 0.5558153  | group.3  | 0.8158971 |
| 4 | 0.8158971  | group.4  | 0.9997078 |

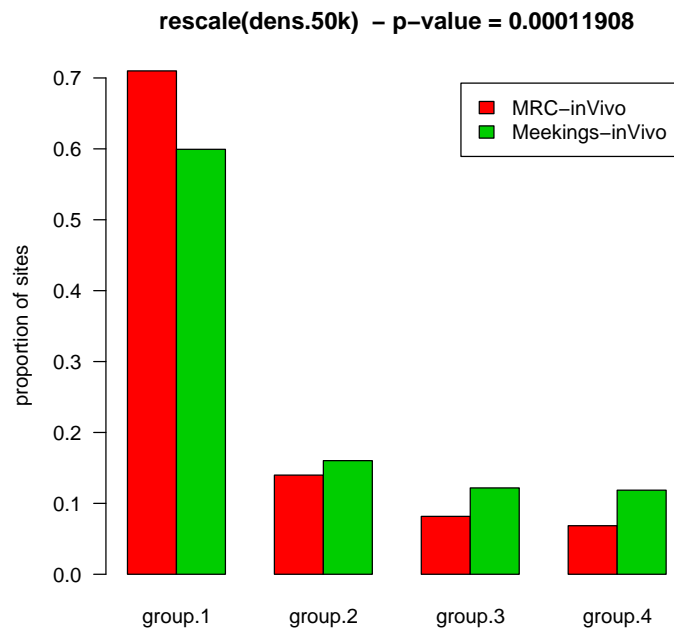

Here are the results for expression density. First, we count just genes that are in the upper half.

Category limits

|   | lower      | category | upper     |
|---|------------|----------|-----------|
| 1 | -0.2270602 | group.1  | 0.5996493 |
| 2 | 0.5996493  | group.2  | 0.7808299 |
| 3 | 0.7808299  | group.3  | 0.9997078 |

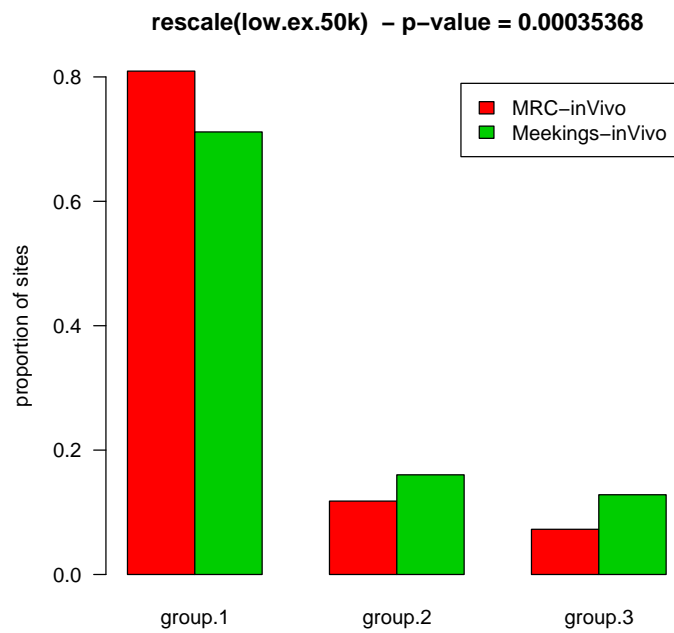

Now we count genes in the upper 1/8<sup>th</sup>:

Category limits

|   | lower      | category | upper     |
|---|------------|----------|-----------|
| 1 | -0.1449445 | group.1  | 0.8027469 |
| 2 | 0.8027469  | group.2  | 0.9997078 |

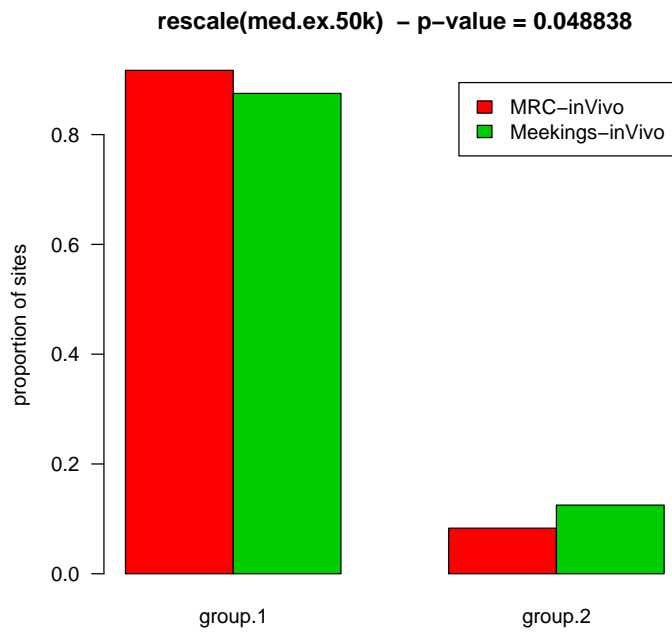

And here we count genes in the upper 1/16<sup>th</sup>:

Category limits

|   | lower       | category | upper     |
|---|-------------|----------|-----------|
| 1 | -0.08503799 | group.1  | 0.8971362 |
| 2 | 0.89713618  | group.2  | 0.9997078 |

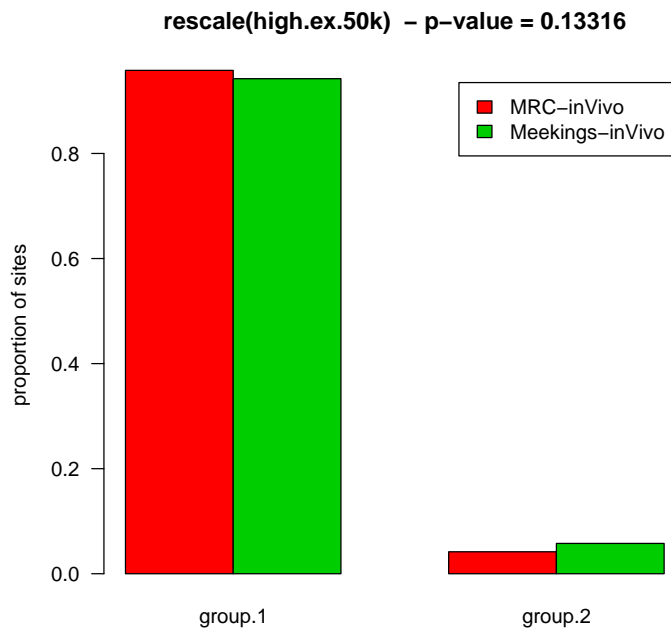

Here the effect of density of CpG islands is studied:

Category limits

|   | lower      | category | upper     |
|---|------------|----------|-----------|
| 1 | -0.4272355 | group.1  | 0.3547633 |
| 2 | 0.3547633  | group.2  | 0.6636470 |
| 3 | 0.6636470  | group.3  | 0.8080070 |
| 4 | 0.8080070  | group.4  | 0.9997078 |

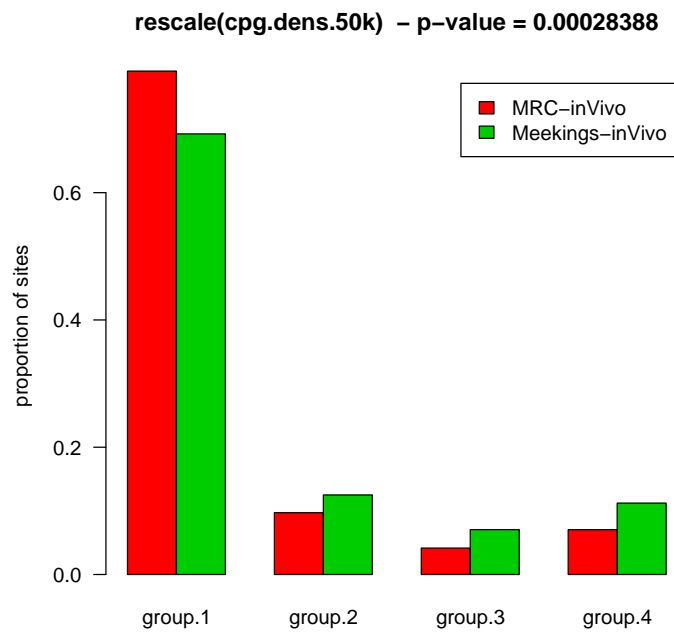

### 4.3 100 kilobase Window

Here are gene densities for the various gene calls

Category limits

|   | lower      | category | upper     |
|---|------------|----------|-----------|
| 1 | -0.4029807 | group.1  | 0.4111631 |
| 2 | 0.4111631  | group.2  | 0.8334307 |
| 3 | 0.8334307  | group.3  | 0.9997078 |

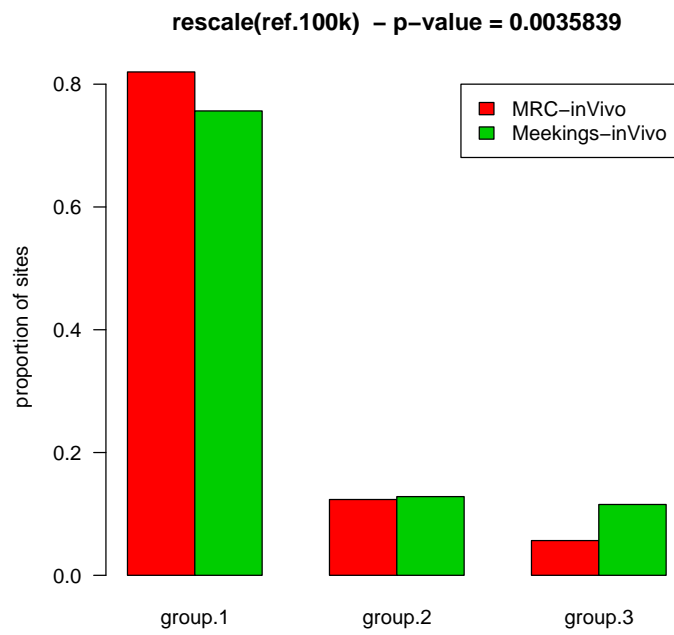



Category limits

|   | lower      | category | upper     |
|---|------------|----------|-----------|
| 1 | -0.4812975 | group.1  | 0.2337814 |
| 2 | 0.2337814  | group.2  | 0.5464641 |
| 3 | 0.5464641  | group.3  | 0.8290473 |
| 4 | 0.8290473  | group.4  | 0.9997078 |

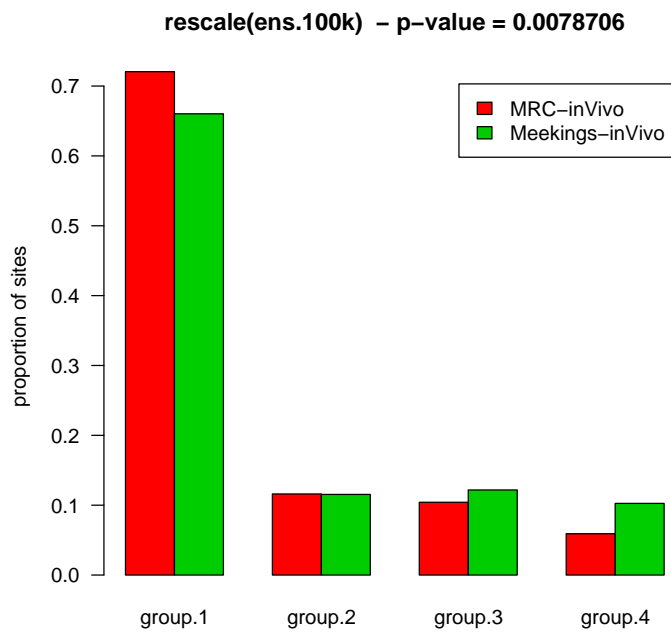

Category limits

|   | lower       | category | upper       |
|---|-------------|----------|-------------|
| 1 | -0.75336061 | group.1  | -0.75336061 |
| 2 | -0.75336061 | group.2  | -0.34687317 |
| 3 | -0.34687317 | group.3  | -0.07188778 |
| 4 | -0.07188778 | group.4  | 0.12887200  |
| 5 | 0.12887200  | group.5  | 0.41729982  |
| 6 | 0.41729982  | group.6  | 0.62887200  |
| 7 | 0.62887200  | group.7  | 0.78112215  |
| 8 | 0.78112215  | group.8  | 0.99970777  |

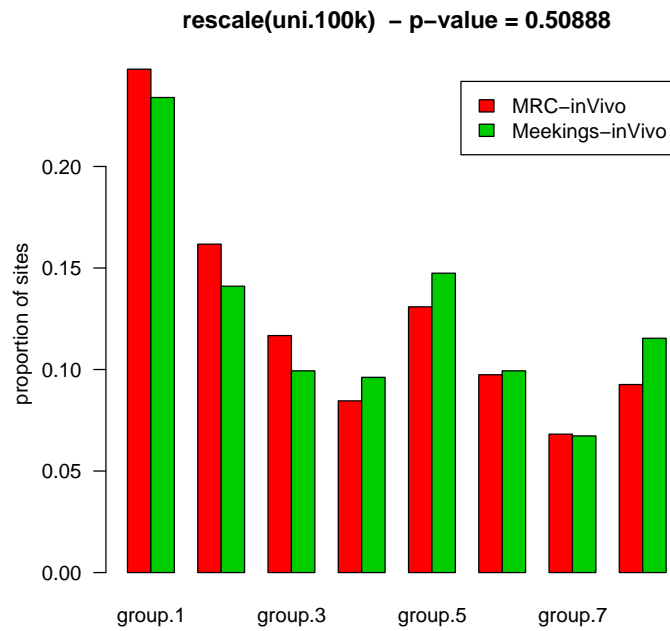

Category limits

|   | lower      | category | upper      |
|---|------------|----------|------------|
| 1 | -0.8232028 | group.1  | -0.2308591 |
| 2 | -0.2308591 | group.2  | 0.4164231  |
| 3 | 0.4164231  | group.3  | 0.7495617  |
| 4 | 0.7495617  | group.4  | 0.9997078  |

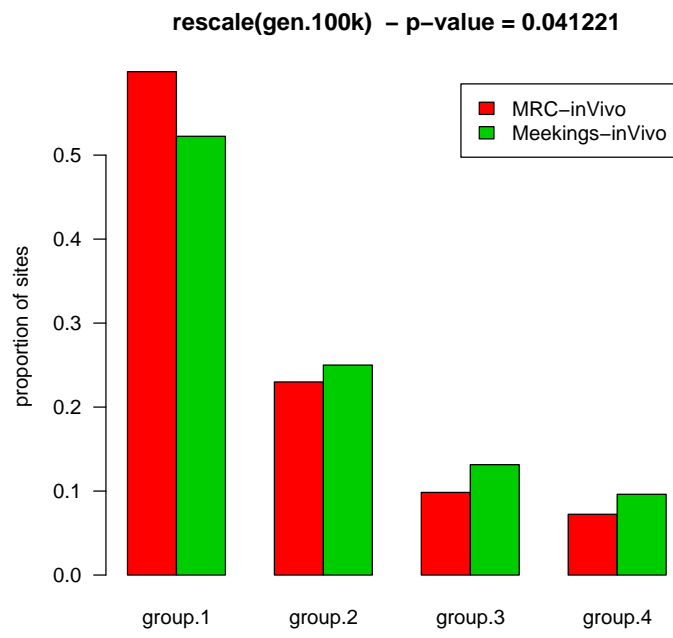

#### 4.4 100 kiloBase Window

In the barplot that follows we examine the association of insertion sites with expression density in a 100 kilobase window surrounding each locus. First, we count just the number of genes on the represented on the chip.

Category limits

|   | lower      | category | upper     |
|---|------------|----------|-----------|
| 1 | -0.5505552 | group.1  | 0.0000000 |
| 2 | 0.0000000  | group.2  | 0.2469316 |
| 3 | 0.2469316  | group.3  | 0.4000877 |
| 4 | 0.4000877  | group.4  | 0.5850380 |
| 5 | 0.5850380  | group.5  | 0.7998247 |
| 6 | 0.7998247  | group.6  | 0.9997078 |

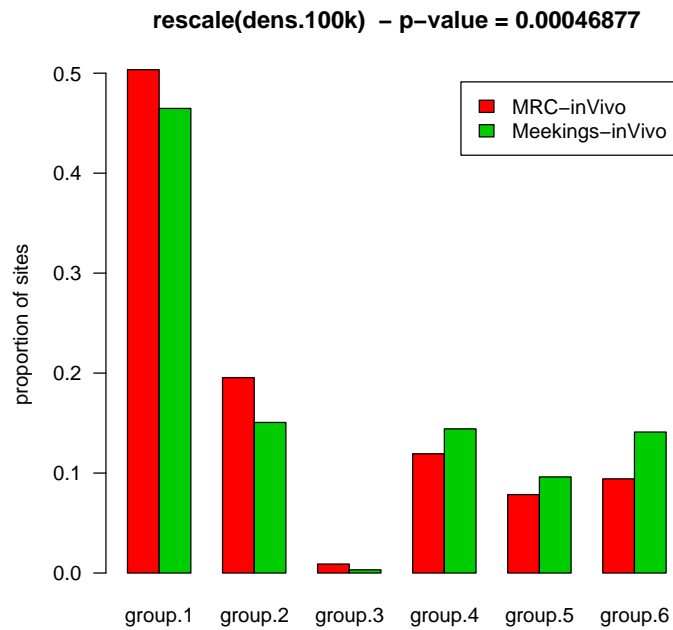

Here are the results for expression density. First, we count just genes that are in the upper half.

Category limits

|   | lower      | category | upper     |
|---|------------|----------|-----------|
| 1 | -0.3451198 | group.1  | 0.3998247 |
| 2 | 0.3998247  | group.2  | 0.6092928 |
| 3 | 0.6092928  | group.3  | 0.8275862 |
| 4 | 0.8275862  | group.4  | 0.9997078 |

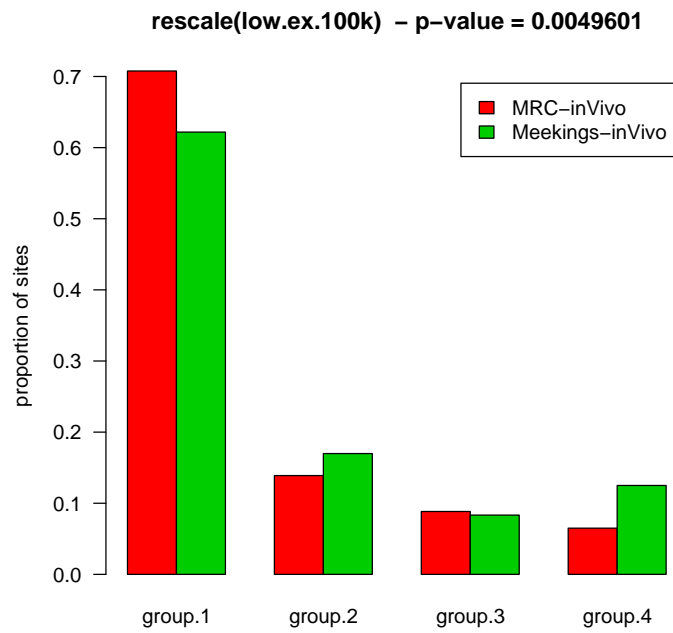

Now we count genes in the upper 1/8<sup>th</sup>:

Category limits

|   | lower      | category | upper     |
|---|------------|----------|-----------|
| 1 | -0.2375804 | group.1  | 0.5990649 |
| 2 | 0.5990649  | group.2  | 0.7983635 |
| 3 | 0.7983635  | group.3  | 0.9997078 |

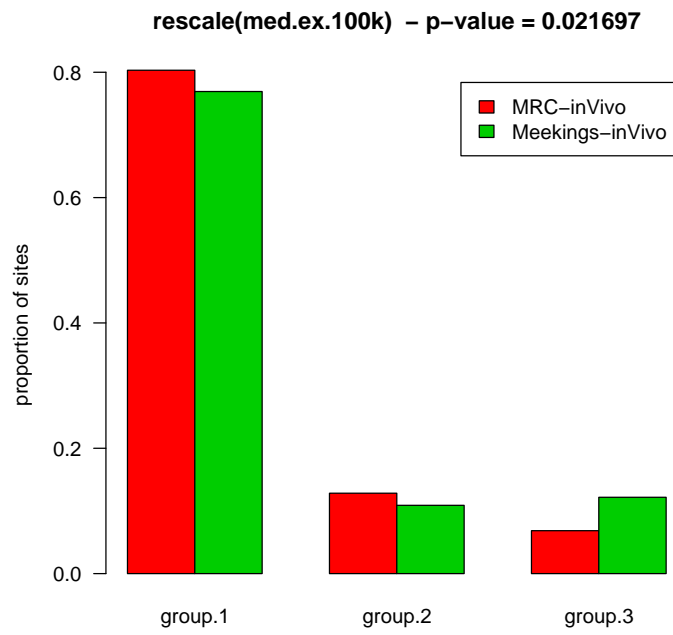

And here we count genes in the upper  $1/16^{th}$ :

Category limits

|   | lower     | category | upper     |
|---|-----------|----------|-----------|
| 1 | -0.150789 | group.1  | 0.8053770 |
| 2 | 0.805377  | group.2  | 0.9997078 |

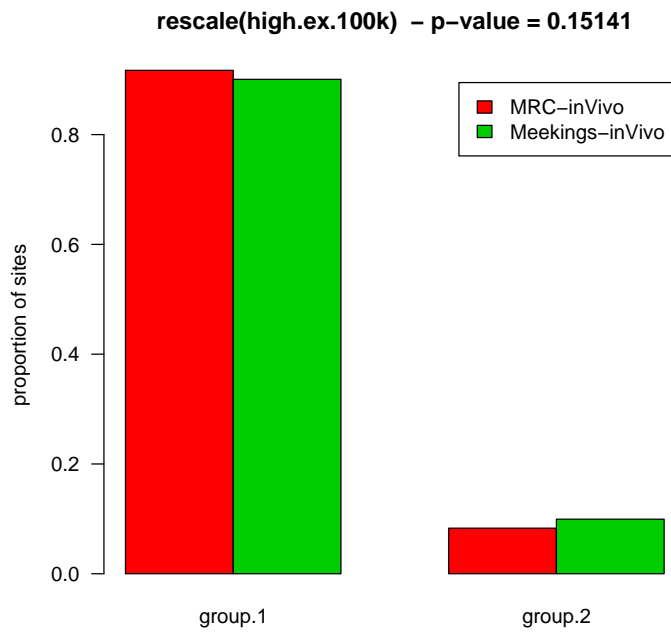

Here the effect of density of CpG islands is studied:

Category limits

|   | lower      | category | upper     |
|---|------------|----------|-----------|
| 1 | -0.5829924 | group.1  | 0.0371128 |
| 2 | 0.0371128  | group.2  | 0.3696669 |
| 3 | 0.3696669  | group.3  | 0.5824079 |
| 4 | 0.5824079  | group.4  | 0.7857978 |
| 5 | 0.7857978  | group.5  | 0.9997078 |

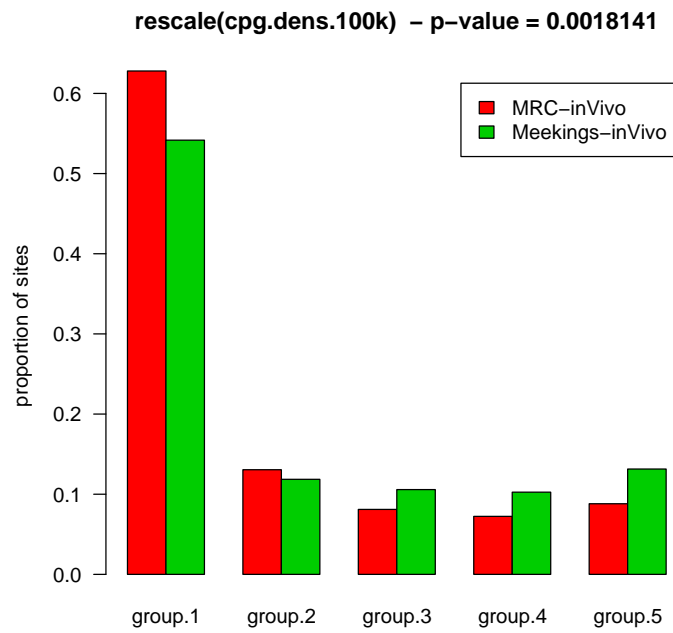



## 4.5 250 kiloBase Window

In the barplot that follows we examine the association of insertion sites with expression density in a 250 kilobase window surrounding each locus. First, we count just the number of genes on the represented on the chip.

Category limits

|   | lower       | category | upper       |
|---|-------------|----------|-------------|
| 1 | -0.75862069 | group.1  | -0.39970777 |
| 2 | -0.39970777 | group.2  | -0.26154296 |
| 3 | -0.26154296 | group.3  | 0.06896552  |
| 4 | 0.06896552  | group.4  | 0.19783752  |
| 5 | 0.19783752  | group.5  | 0.40385739  |
| 6 | 0.40385739  | group.6  | 0.59964933  |
| 7 | 0.59964933  | group.7  | 0.79544126  |
| 8 | 0.79544126  | group.8  | 0.99970777  |

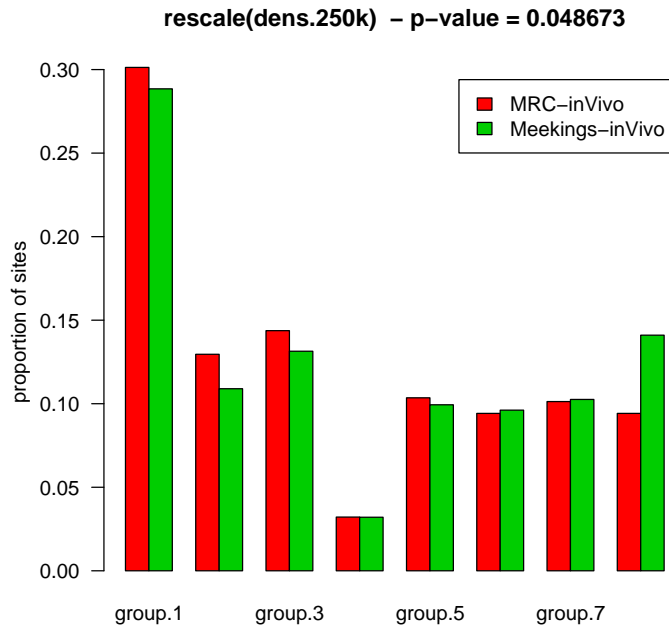

Here are the results for expression density. First, we count just genes that are in the upper half.

Category limits

|   | lower         | category | upper        |
|---|---------------|----------|--------------|
| 1 | -0.5219170076 | group.1  | 0.0005844535 |
| 2 | 0.0005844535  | group.2  | 0.2650496786 |
| 3 | 0.2650496786  | group.3  | 0.3991817650 |
| 4 | 0.3991817650  | group.4  | 0.6005260082 |
| 5 | 0.6005260082  | group.5  | 0.8009935710 |
| 6 | 0.8009935710  | group.6  | 0.9997077732 |

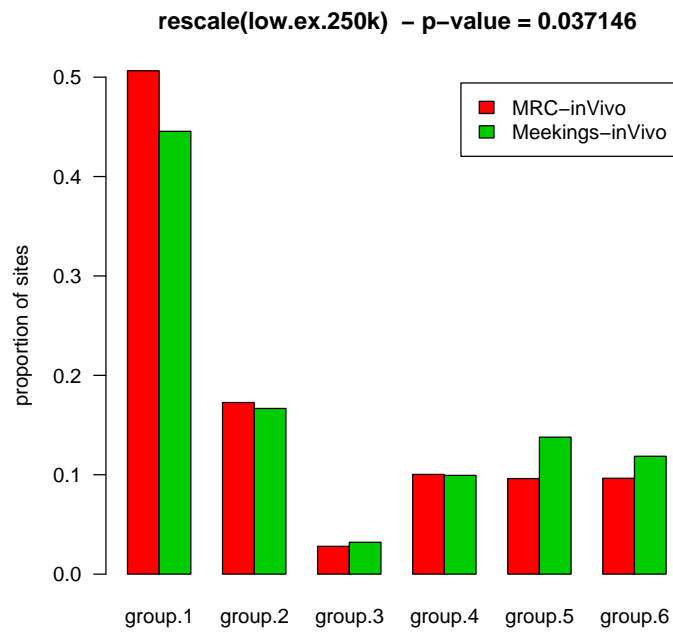

Now we count genes in the upper 1/8<sup>th</sup>:

Category limits

|   | lower      | category | upper     |
|---|------------|----------|-----------|
| 1 | -0.3977206 | group.1  | 0.3661601 |
| 2 | 0.3661601  | group.2  | 0.5622443 |
| 3 | 0.5622443  | group.3  | 0.7995324 |
| 4 | 0.7995324  | group.4  | 0.9997078 |

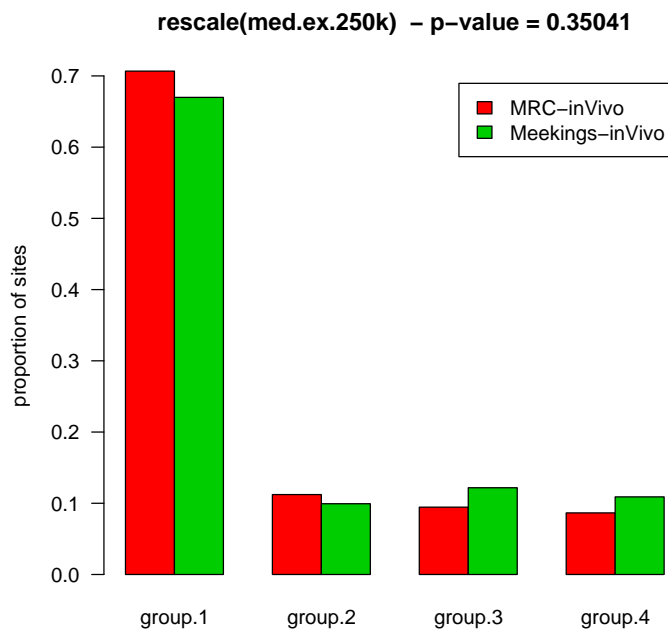

And here we count genes in the upper 1/16<sup>th</sup>:

Category limits

|   | lower      | category | upper     |
|---|------------|----------|-----------|
| 1 | -0.2849211 | group.1  | 0.6072472 |
| 2 | 0.6072472  | group.2  | 0.7665108 |
| 3 | 0.7665108  | group.3  | 0.9997078 |

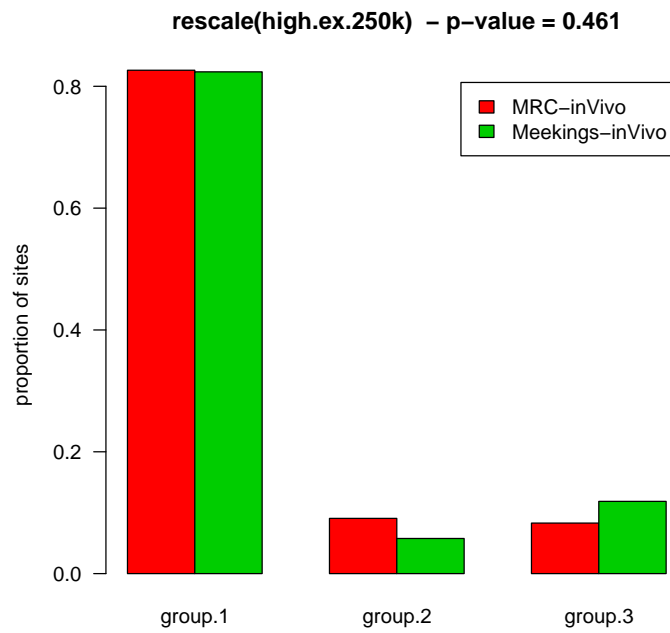

Here the effect of density of CpG islands is studied:

Category limits

|   | lower       | category | upper       |
|---|-------------|----------|-------------|
| 1 | -0.76914085 | group.1  | -0.39392168 |
| 2 | -0.39392168 | group.2  | -0.13471654 |
| 3 | -0.13471654 | group.3  | 0.06779661  |
| 4 | 0.06779661  | group.4  | 0.23436587  |
| 5 | 0.23436587  | group.5  | 0.38427820  |
| 6 | 0.38427820  | group.6  | 0.57510228  |
| 7 | 0.57510228  | group.7  | 0.79602572  |
| 8 | 0.79602572  | group.8  | 0.99970777  |

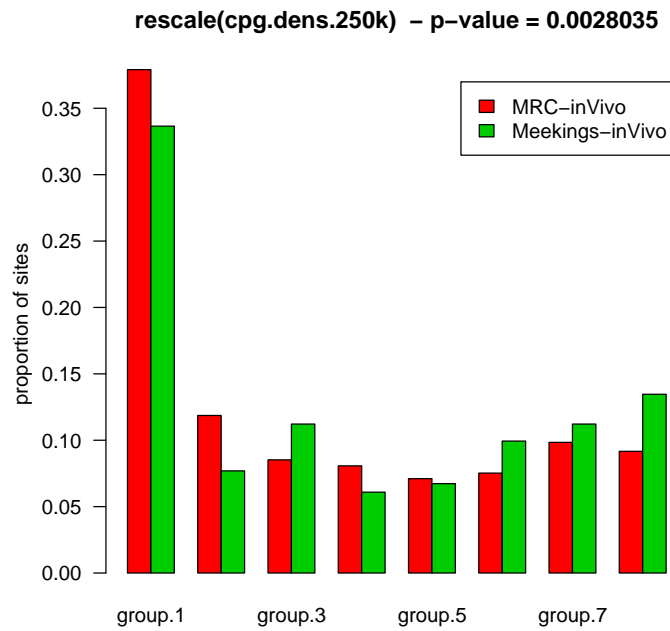

## 4.6 500 kilobase Window

Here are gene densities for the various gene calls

Category limits

|   | lower       | category | upper       |
|---|-------------|----------|-------------|
| 1 | -0.75891292 | group.1  | -0.35563998 |
| 2 | -0.35563998 | group.2  | -0.07568673 |
| 3 | -0.07568673 | group.3  | 0.12507306  |
| 4 | 0.12507306  | group.4  | 0.41642314  |
| 5 | 0.41642314  | group.5  | 0.62068966  |
| 6 | 0.62068966  | group.6  | 0.81180596  |
| 7 | 0.81180596  | group.7  | 0.99970777  |

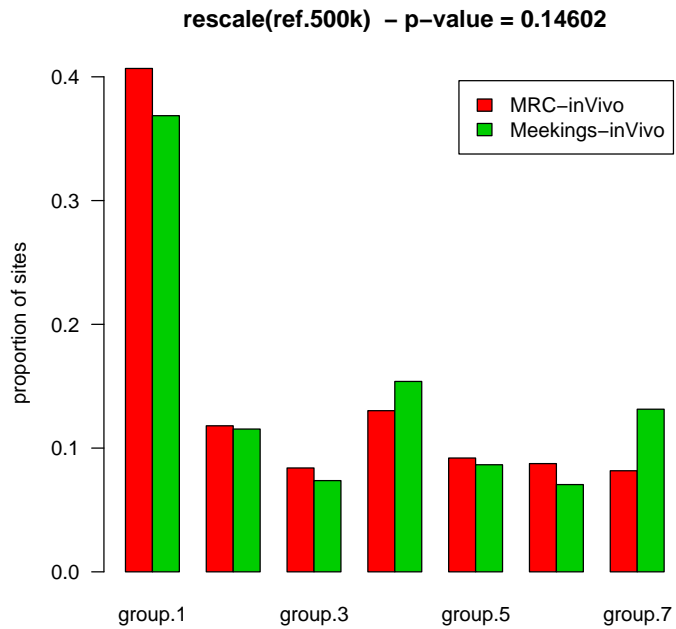

Category limits

|   | lower       | category | upper       |
|---|-------------|----------|-------------|
| 1 | -0.81531268 | group.1  | -0.51315020 |
| 2 | -0.51315020 | group.2  | -0.13179427 |
| 3 | -0.13179427 | group.3  | 0.01899474  |
| 4 | 0.01899474  | group.4  | 0.15926359  |
| 5 | 0.15926359  | group.5  | 0.37463472  |
| 6 | 0.37463472  | group.6  | 0.59877265  |
| 7 | 0.59877265  | group.7  | 0.80099357  |
| 8 | 0.80099357  | group.8  | 0.99970777  |

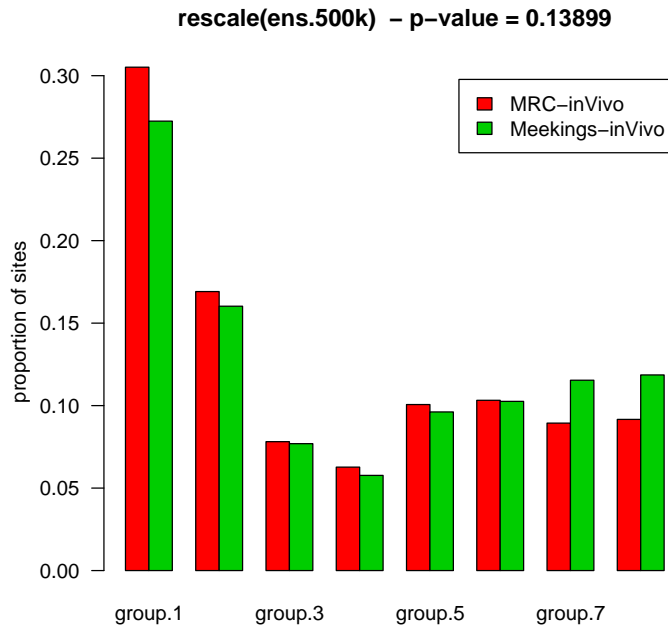

Category limits

|    | lower       | category | upper       |
|----|-------------|----------|-------------|
| 1  | -0.96610169 | group.1  | -0.80187025 |
| 2  | -0.80187025 | group.2  | -0.57334892 |
| 3  | -0.57334892 | group.3  | -0.38924605 |
| 4  | -0.38924605 | group.4  | -0.22618352 |
| 5  | -0.22618352 | group.5  | 0.02016365  |
| 6  | 0.02016365  | group.6  | 0.21420222  |
| 7  | 0.21420222  | group.7  | 0.38018703  |
| 8  | 0.38018703  | group.8  | 0.59292811  |
| 9  | 0.59292811  | group.9  | 0.79193454  |
| 10 | 0.79193454  | group.10 | 0.99970777  |

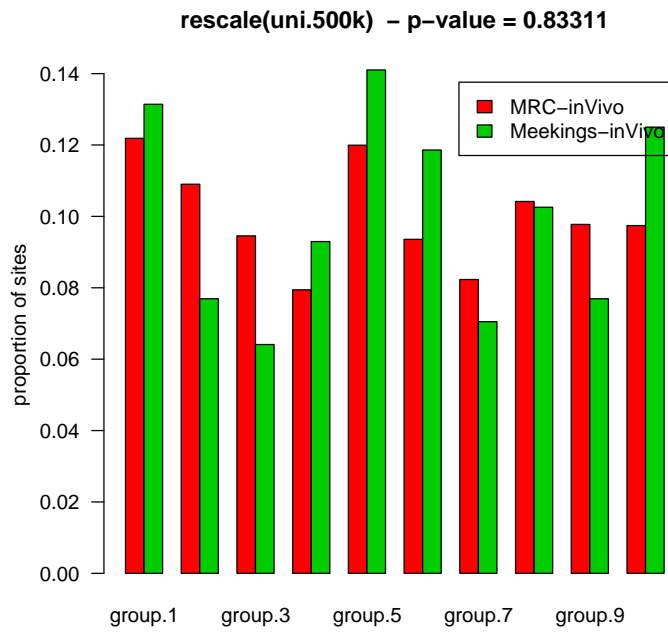



Category limits

|    | lower       | category | upper       |
|----|-------------|----------|-------------|
| 1  | -0.99853887 | group.1  | -0.74663939 |
| 2  | -0.74663939 | group.2  | -0.57860900 |
| 3  | -0.57860900 | group.3  | -0.39596727 |
| 4  | -0.39596727 | group.4  | -0.18994740 |
| 5  | -0.18994740 | group.5  | 0.02571596  |
| 6  | 0.02571596  | group.6  | 0.22998247  |
| 7  | 0.22998247  | group.7  | 0.39947399  |
| 8  | 0.39947399  | group.8  | 0.63471654  |
| 9  | 0.63471654  | group.9  | 0.78784337  |
| 10 | 0.78784337  | group.10 | 0.99970777  |

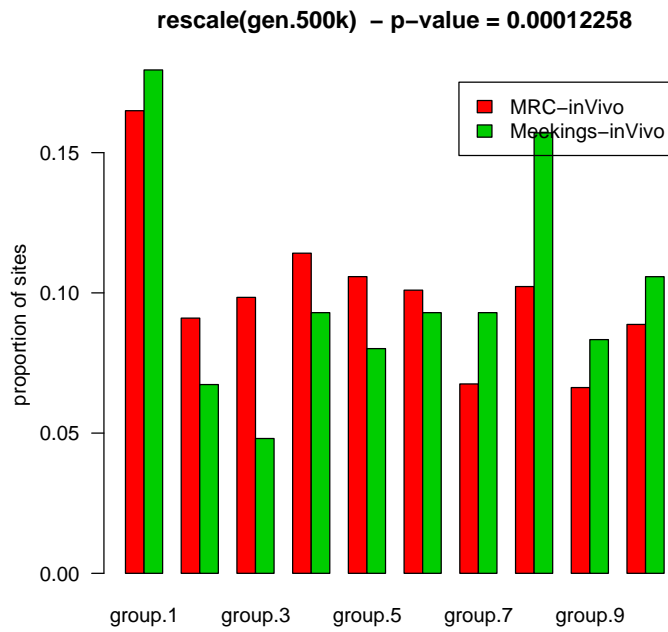

## 4.7 500 kiloBase Window

In the barplot that follows we examine the association of insertion sites with expression density in a 500 kilobase window surrounding each locus. First, we count just the number of genes on the represented on the chip.

Category limits

|   | lower        | category | upper        |
|---|--------------|----------|--------------|
| 1 | -0.877849211 | group.1  | -0.612507306 |
| 2 | -0.612507306 | group.2  | -0.391291642 |
| 3 | -0.391291642 | group.3  | -0.186440678 |
| 4 | -0.186440678 | group.4  | 0.004675628  |
| 5 | 0.004675628  | group.5  | 0.199941555  |
| 6 | 0.199941555  | group.6  | 0.401811806  |
| 7 | 0.401811806  | group.7  | 0.597019287  |
| 8 | 0.597019287  | group.8  | 0.799532437  |
| 9 | 0.799532437  | group.9  | 0.999707773  |

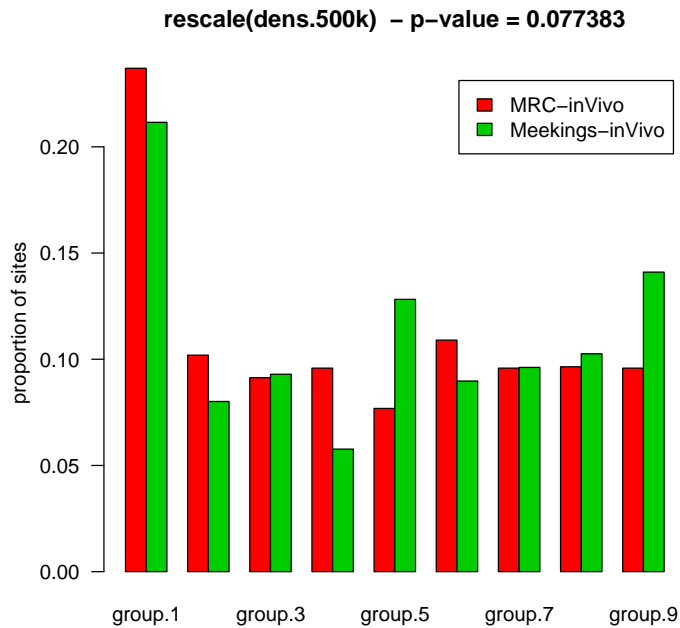

Here are the results for expression density. First, we count just genes that are in the upper half.

Category limits

|   | lower       | category | upper       |
|---|-------------|----------|-------------|
| 1 | -0.66861485 | group.1  | -0.66861485 |
| 2 | -0.66861485 | group.2  | -0.20192870 |
| 3 | -0.20192870 | group.3  | -0.07685564 |
| 4 | -0.07685564 | group.4  | 0.20572764  |
| 5 | 0.20572764  | group.5  | 0.40911748  |
| 6 | 0.40911748  | group.6  | 0.60005845  |
| 7 | 0.60005845  | group.7  | 0.79976622  |
| 8 | 0.79976622  | group.8  | 0.99970777  |

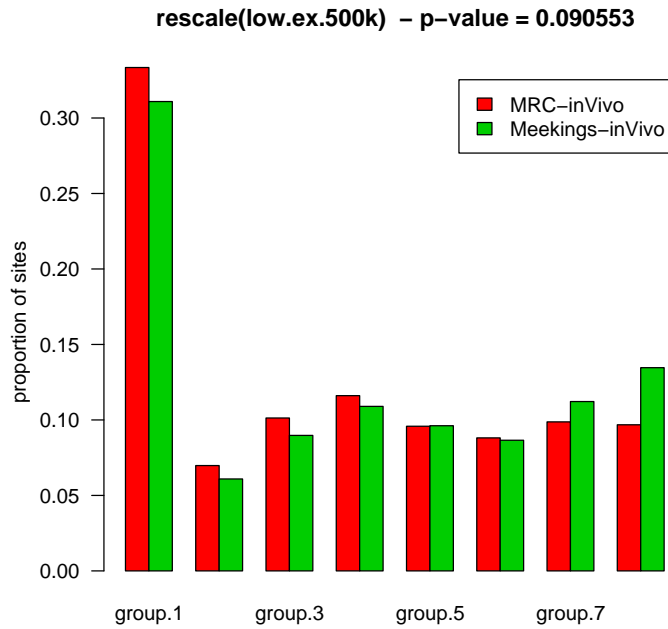

Now we count genes in the upper  $1/8^{th}$ :

Category limits

|   | lower         | category | upper         |
|---|---------------|----------|---------------|
| 1 | -0.5520163647 | group.1  | -0.0005844535 |
| 2 | -0.0005844535 | group.2  | 0.2530683811  |
| 3 | 0.2530683811  | group.3  | 0.3998831093  |
| 4 | 0.3998831093  | group.4  | 0.6002337814  |
| 5 | 0.6002337814  | group.5  | 0.7995324372  |
| 6 | 0.7995324372  | group.6  | 0.9997077732  |

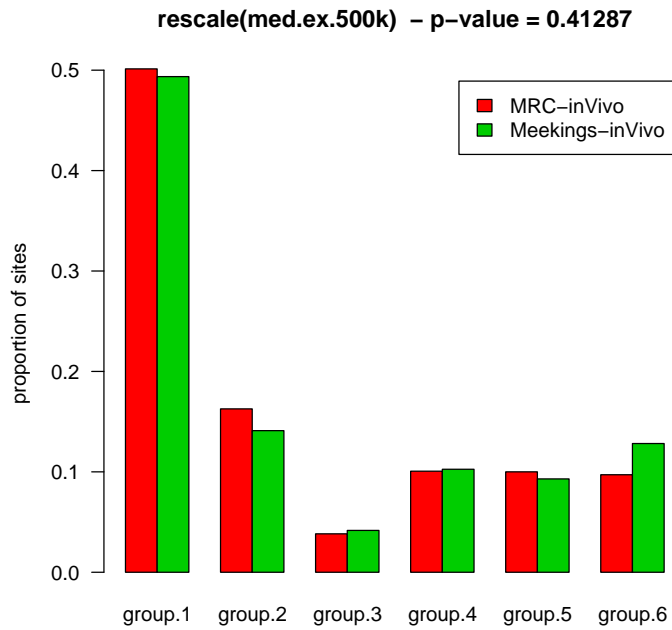

And here we count genes in the upper 1/16<sup>th</sup>:

Category limits

|   | lower      | category | upper     |
|---|------------|----------|-----------|
| 1 | -0.4327878 | group.1  | 0.1999416 |
| 2 | 0.1999416  | group.2  | 0.4004968 |
| 3 | 0.4004968  | group.3  | 0.5368206 |
| 4 | 0.5368206  | group.4  | 0.8005552 |
| 5 | 0.8005552  | group.5  | 0.9997078 |

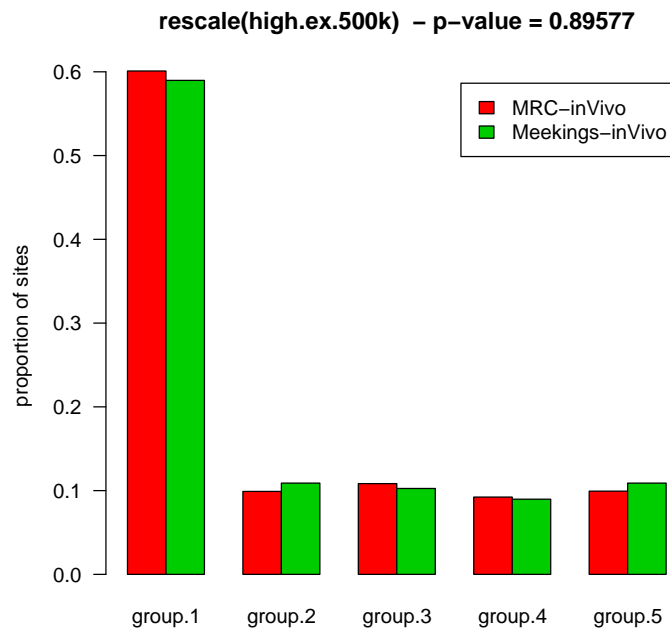

Here the effect of density of CpG islands is studied:

Category limits

|   | lower       | category | upper       |
|---|-------------|----------|-------------|
| 1 | -0.88749269 | group.1  | -0.68527177 |
| 2 | -0.68527177 | group.2  | -0.33781414 |
| 3 | -0.33781414 | group.3  | -0.19462303 |
| 4 | -0.19462303 | group.4  | 0.03857393  |
| 5 | 0.03857393  | group.5  | 0.23202805  |
| 6 | 0.23202805  | group.6  | 0.39479836  |
| 7 | 0.39479836  | group.7  | 0.59672706  |
| 8 | 0.59672706  | group.8  | 0.80508475  |
| 9 | 0.80508475  | group.9  | 0.99970777  |

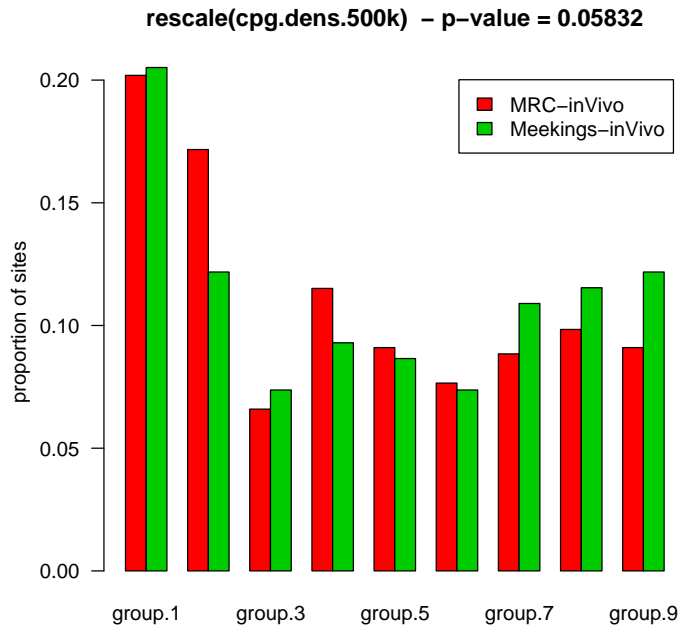

## 4.8 1 megabase Window

Here are gene densities for the various gene calls

Category limits

|   | lower       | category | upper       |
|---|-------------|----------|-------------|
| 1 | -0.88544711 | group.1  | -0.66072472 |
| 2 | -0.66072472 | group.2  | -0.46113384 |
| 3 | -0.46113384 | group.3  | -0.17825833 |
| 4 | -0.17825833 | group.4  | -0.04412624 |
| 5 | -0.04412624 | group.5  | 0.19316189  |
| 6 | 0.19316189  | group.6  | 0.36645237  |
| 7 | 0.36645237  | group.7  | 0.61542957  |
| 8 | 0.61542957  | group.8  | 0.80420807  |
| 9 | 0.80420807  | group.9  | 0.99970777  |

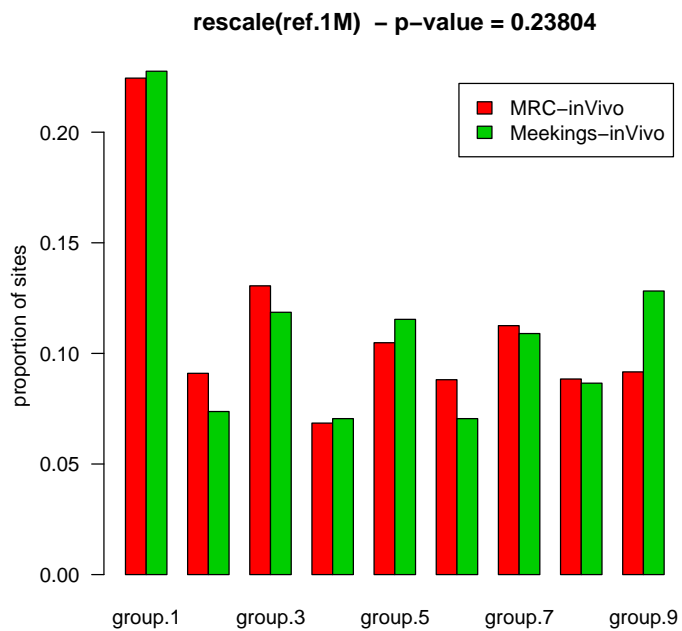

Category limits

|    | lower       | category | upper       |
|----|-------------|----------|-------------|
| 1  | -0.92255991 | group.1  | -0.77586207 |
| 2  | -0.77586207 | group.2  | -0.63354763 |
| 3  | -0.63354763 | group.3  | -0.38924605 |
| 4  | -0.38924605 | group.4  | -0.19082408 |
| 5  | -0.19082408 | group.5  | -0.01578025 |
| 6  | -0.01578025 | group.6  | 0.20601987  |
| 7  | 0.20601987  | group.7  | 0.40064290  |
| 8  | 0.40064290  | group.8  | 0.60198714  |
| 9  | 0.60198714  | group.9  | 0.79777908  |
| 10 | 0.79777908  | group.10 | 0.99970777  |

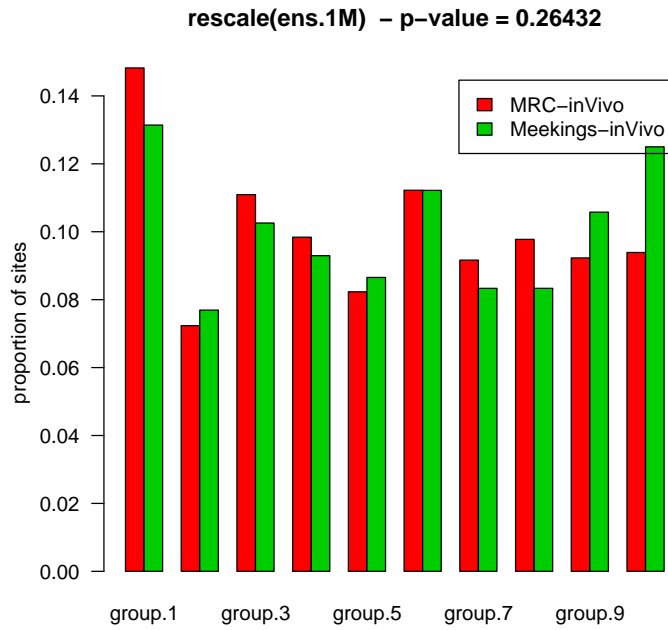



Category limits

|    | lower      | category | upper      |
|----|------------|----------|------------|
| 1  | -0.9929866 | group.1  | -0.7986558 |
| 2  | -0.7986558 | group.2  | -0.5999416 |
| 3  | -0.5999416 | group.3  | -0.4038574 |
| 4  | -0.4038574 | group.4  | -0.2098188 |
| 5  | -0.2098188 | group.5  | 0.0000000  |
| 6  | 0.0000000  | group.6  | 0.2025132  |
| 7  | 0.2025132  | group.7  | 0.3994740  |
| 8  | 0.3994740  | group.8  | 0.6043250  |
| 9  | 0.6043250  | group.9  | 0.8015780  |
| 10 | 0.8015780  | group.10 | 0.9997078  |

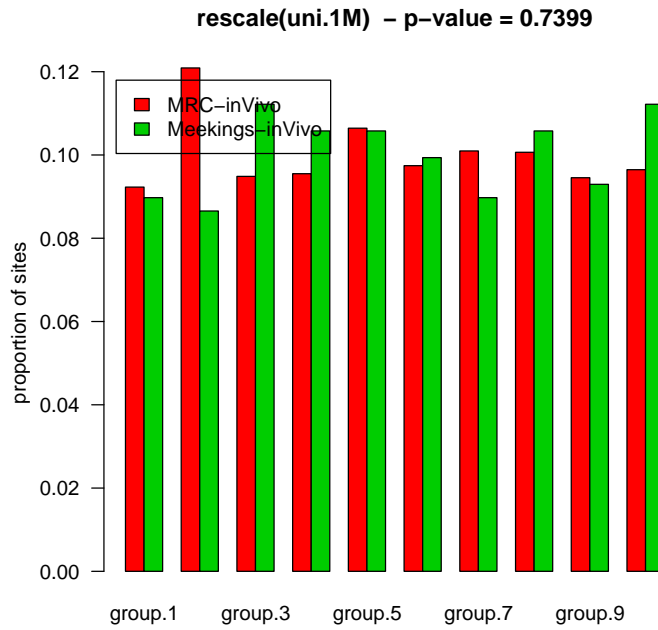

Category limits

|    | lower       | category | upper       |
|----|-------------|----------|-------------|
| 1  | -0.99970777 | group.1  | -0.82437171 |
| 2  | -0.82437171 | group.2  | -0.56428989 |
| 3  | -0.56428989 | group.3  | -0.45616598 |
| 4  | -0.45616598 | group.4  | -0.23056692 |
| 5  | -0.23056692 | group.5  | 0.01490357  |
| 6  | 0.01490357  | group.6  | 0.23962595  |
| 7  | 0.23962595  | group.7  | 0.43366452  |
| 8  | 0.43366452  | group.8  | 0.58620690  |
| 9  | 0.58620690  | group.9  | 0.79748685  |
| 10 | 0.79748685  | group.10 | 0.99970777  |

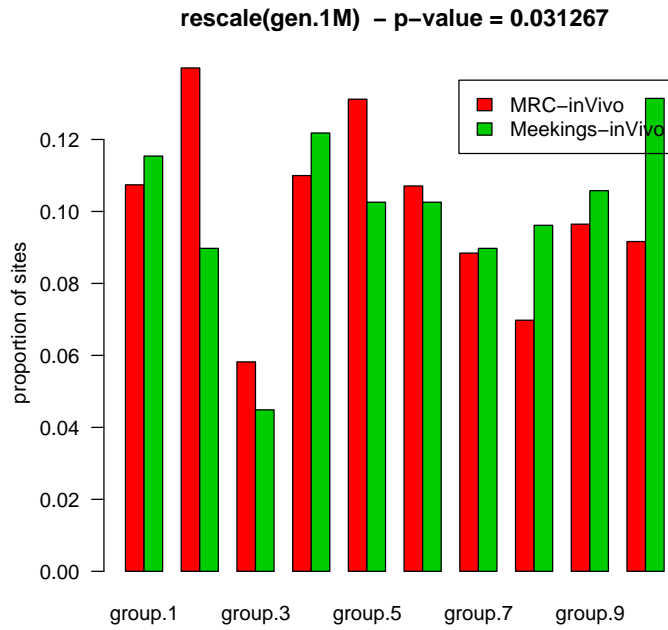

## 4.9 1 megaBase Window

In the barplot that follows we examine the association of insertion sites with expression density in a 1 megabase window surrounding each locus. First, we count just the number of genes on the represented on the chip.

Category limits

|    | lower      | category | upper      |
|----|------------|----------|------------|
| 1  | -0.9590883 | group.1  | -0.8002922 |
| 2  | -0.8002922 | group.2  | -0.5990649 |
| 3  | -0.5990649 | group.3  | -0.3997662 |
| 4  | -0.3997662 | group.4  | -0.2013442 |
| 5  | -0.2013442 | group.5  | 0.0000000  |
| 6  | 0.0000000  | group.6  | 0.2019287  |
| 7  | 0.2019287  | group.7  | 0.3997662  |
| 8  | 0.3997662  | group.8  | 0.5987726  |
| 9  | 0.5987726  | group.9  | 0.7997662  |
| 10 | 0.7997662  | group.10 | 0.9997078  |

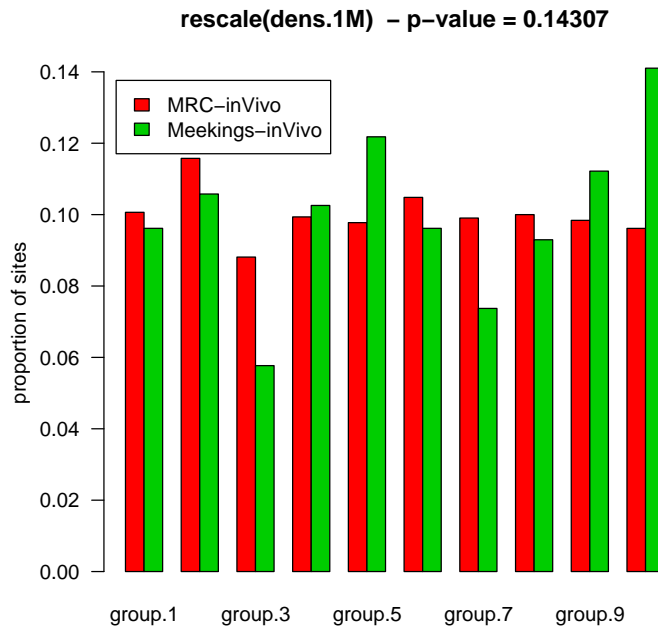

Here are the results for expression density. First, we count just genes that are in the upper half.

Category limits

|   | lower      | category | upper      |
|---|------------|----------|------------|
| 1 | -0.8097604 | group.1  | -0.6002922 |
| 2 | -0.6002922 | group.2  | -0.4140853 |
| 3 | -0.4140853 | group.3  | -0.1914085 |
| 4 | -0.1914085 | group.4  | 0.0000000  |
| 5 | 0.0000000  | group.5  | 0.1999416  |
| 6 | 0.1999416  | group.6  | 0.3994740  |
| 7 | 0.3994740  | group.7  | 0.5998247  |
| 8 | 0.5998247  | group.8  | 0.7997370  |
| 9 | 0.7997370  | group.9  | 0.9997078  |

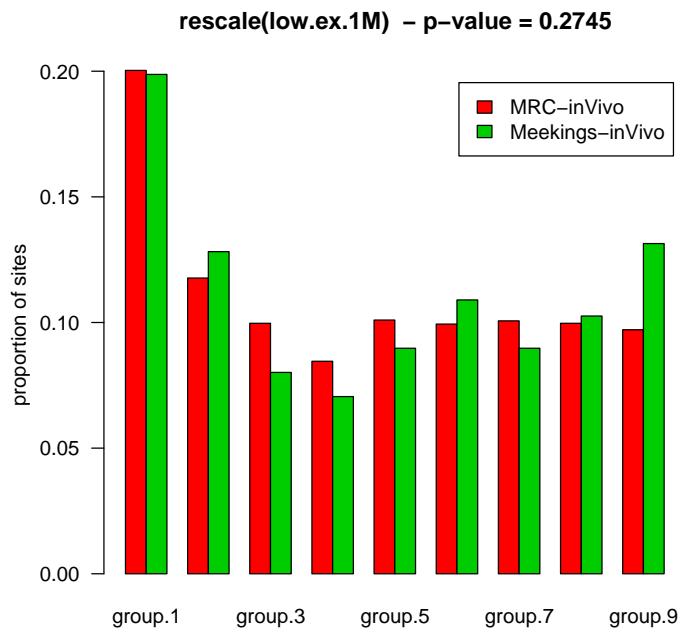

Now we count genes in the upper 1/8<sup>th</sup>:

Category limits

|   | lower        | category | upper        |
|---|--------------|----------|--------------|
| 1 | -0.716540035 | group.1  | -0.391291642 |
| 2 | -0.391291642 | group.2  | -0.199941555 |
| 3 | -0.199941555 | group.3  | -0.001461134 |
| 4 | -0.001461134 | group.4  | 0.194038574  |
| 5 | 0.194038574  | group.5  | 0.401022794  |
| 6 | 0.401022794  | group.6  | 0.600526008  |
| 7 | 0.600526008  | group.7  | 0.800292227  |
| 8 | 0.800292227  | group.8  | 0.999707773  |

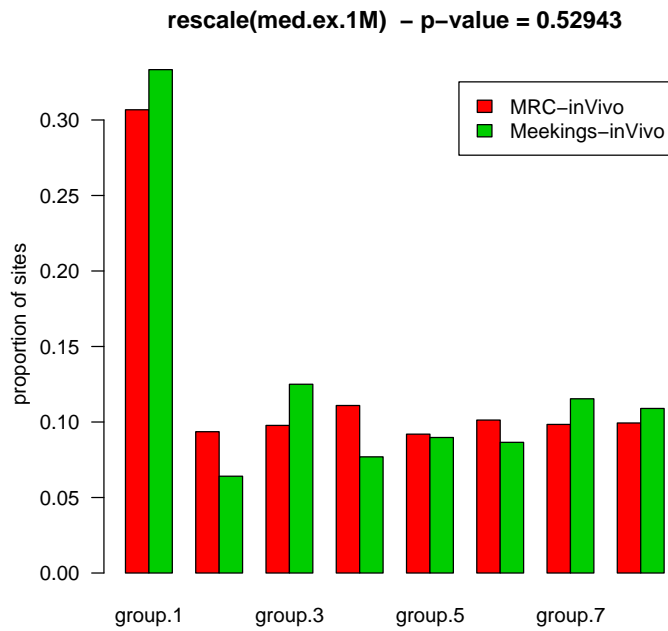

And here we count genes in the upper 1/16<sup>th</sup>:

Category limits

|   | lower       | category | upper       |
|---|-------------|----------|-------------|
| 1 | -0.61250731 | group.1  | -0.19935710 |
| 2 | -0.19935710 | group.2  | -0.02220923 |
| 3 | -0.02220923 | group.3  | 0.21595558  |
| 4 | 0.21595558  | group.4  | 0.39988311  |
| 5 | 0.39988311  | group.5  | 0.59292811  |
| 6 | 0.59292811  | group.6  | 0.79018118  |
| 7 | 0.79018118  | group.7  | 0.99970777  |

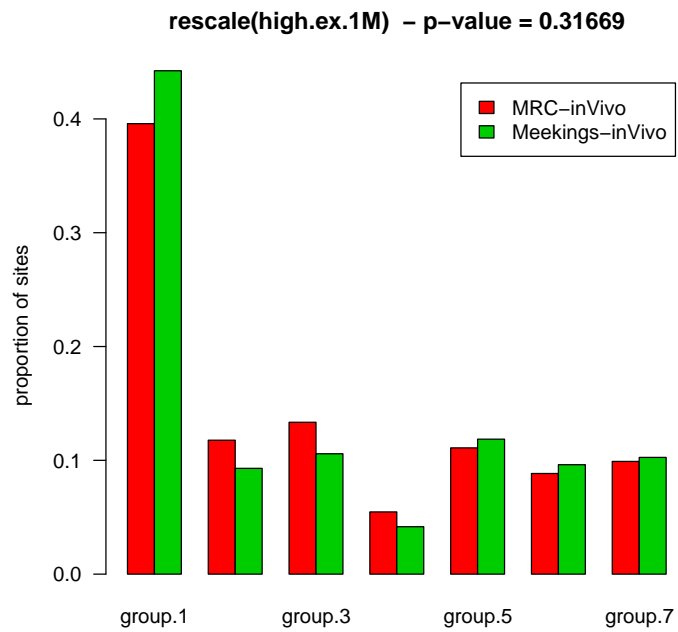

Here the effect of density of CpG islands is studied:

Category limits

|    | lower       | category | upper       |
|----|-------------|----------|-------------|
| 1  | -0.96668615 | group.1  | -0.79485681 |
| 2  | -0.79485681 | group.2  | -0.62507306 |
| 3  | -0.62507306 | group.3  | -0.37288136 |
| 4  | -0.37288136 | group.4  | -0.19783752 |
| 5  | -0.19783752 | group.5  | 0.03419053  |
| 6  | 0.03419053  | group.6  | 0.20017534  |
| 7  | 0.20017534  | group.7  | 0.38398597  |
| 8  | 0.38398597  | group.8  | 0.60695500  |
| 9  | 0.60695500  | group.9  | 0.79953244  |
| 10 | 0.79953244  | group.10 | 0.99970777  |

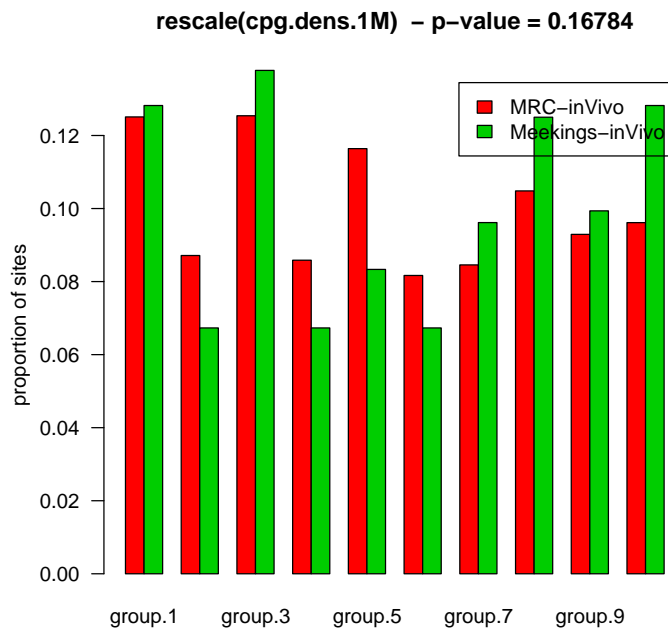

## 4.10 2 megabase Window

Here are gene densities for the various gene calls

Category limits

|    | lower       | category | upper       |
|----|-------------|----------|-------------|
| 1  | -0.96580947 | group.1  | -0.77966102 |
| 2  | -0.77966102 | group.2  | -0.60753945 |
| 3  | -0.60753945 | group.3  | -0.43220339 |
| 4  | -0.43220339 | group.4  | -0.16715371 |
| 5  | -0.16715371 | group.5  | -0.01344243 |
| 6  | -0.01344243 | group.6  | 0.18965517  |
| 7  | 0.18965517  | group.7  | 0.39713618  |
| 8  | 0.39713618  | group.8  | 0.59438925  |
| 9  | 0.59438925  | group.9  | 0.80157802  |
| 10 | 0.80157802  | group.10 | 0.99970777  |

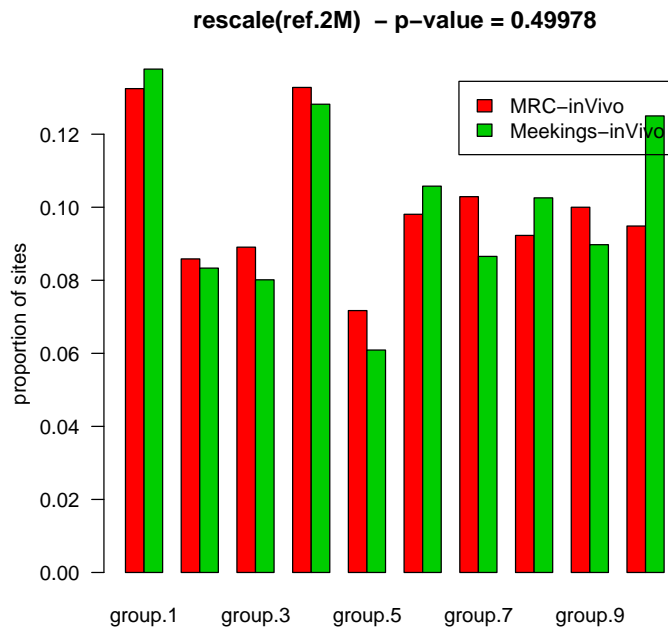



Category limits

|    | lower      | category | upper      |
|----|------------|----------|------------|
| 1  | -0.9774985 | group.1  | -0.8202805 |
| 2  | -0.8202805 | group.2  | -0.5768556 |
| 3  | -0.5768556 | group.3  | -0.3994740 |
| 4  | -0.3994740 | group.4  | -0.2124489 |
| 5  | -0.2124489 | group.5  | 0.0000000  |
| 6  | 0.0000000  | group.6  | 0.1861485  |
| 7  | 0.1861485  | group.7  | 0.4070719  |
| 8  | 0.4070719  | group.8  | 0.5885447  |
| 9  | 0.5885447  | group.9  | 0.7986558  |
| 10 | 0.7986558  | group.10 | 0.9997078  |

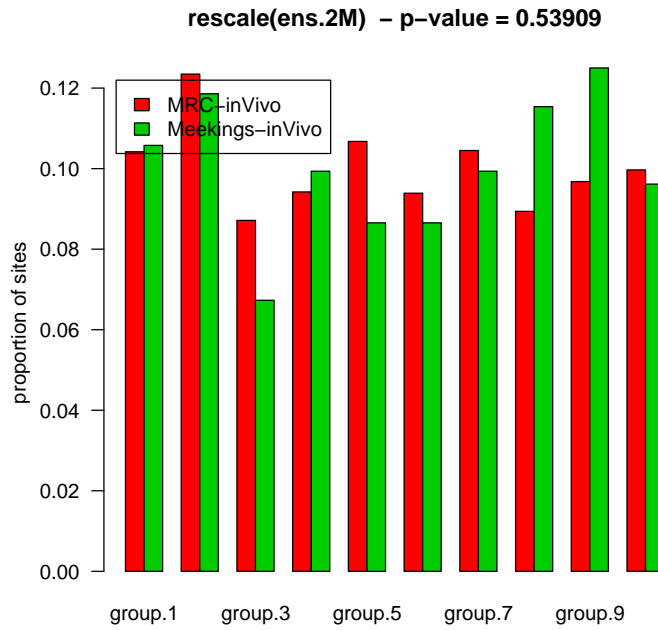

Category limits

|    | lower         | category | upper         |
|----|---------------|----------|---------------|
| 1  | -0.9994155465 | group.1  | -0.7983635301 |
| 2  | -0.7983635301 | group.2  | -0.5990648743 |
| 3  | -0.5990648743 | group.3  | -0.4035651666 |
| 4  | -0.4035651666 | group.4  | -0.2051431911 |
| 5  | -0.2051431911 | group.5  | -0.0002922268 |
| 6  | -0.0002922268 | group.6  | 0.2036820573  |
| 7  | 0.2036820573  | group.7  | 0.4035651666  |
| 8  | 0.4035651666  | group.8  | 0.6014026885  |
| 9  | 0.6014026885  | group.9  | 0.8012857978  |
| 10 | 0.8012857978  | group.10 | 0.9997077732  |

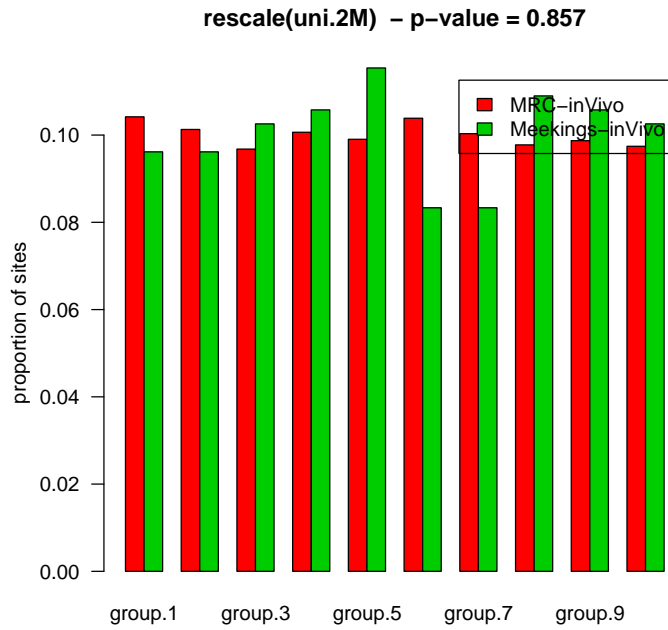

Category limits

|    | lower       | category | upper       |
|----|-------------|----------|-------------|
| 1  | -0.99970777 | group.1  | -0.80683811 |
| 2  | -0.80683811 | group.2  | -0.58591467 |
| 3  | -0.58591467 | group.3  | -0.41057861 |
| 4  | -0.41057861 | group.4  | -0.21887785 |
| 5  | -0.21887785 | group.5  | -0.02425482 |
| 6  | -0.02425482 | group.6  | 0.18819404  |
| 7  | 0.18819404  | group.7  | 0.42022209  |
| 8  | 0.42022209  | group.8  | 0.60783168  |
| 9  | 0.60783168  | group.9  | 0.80546464  |
| 10 | 0.80546464  | group.10 | 0.99970777  |

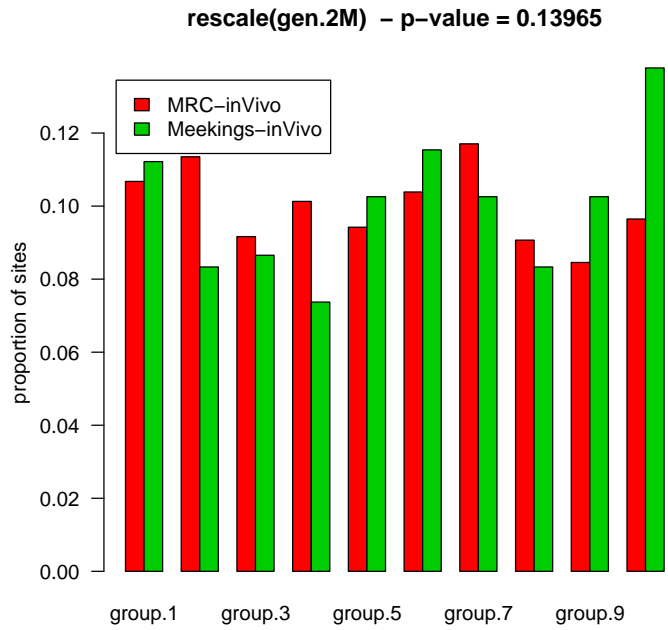

## 4.11 2 megaBase Window

In the barplot that follows we examine the association of insertion sites with expression density in a 2 megabase window surrounding each locus. First, we count just the number of genes on the represented on the chip.

Category limits

|    | lower         | category | upper         |
|----|---------------|----------|---------------|
| 1  | -0.9929865576 | group.1  | -0.7995324372 |
| 2  | -0.7995324372 | group.2  | -0.5998246639 |
| 3  | -0.5998246639 | group.3  | -0.4000876680 |
| 4  | -0.4000876680 | group.4  | -0.1999415546 |
| 5  | -0.1999415546 | group.5  | 0.0005844535  |
| 6  | 0.0005844535  | group.6  | 0.2002922268  |
| 7  | 0.2002922268  | group.7  | 0.3997077732  |
| 8  | 0.3997077732  | group.8  | 0.5998246639  |
| 9  | 0.5998246639  | group.9  | 0.7997662186  |
| 10 | 0.7997662186  | group.10 | 0.9997077732  |

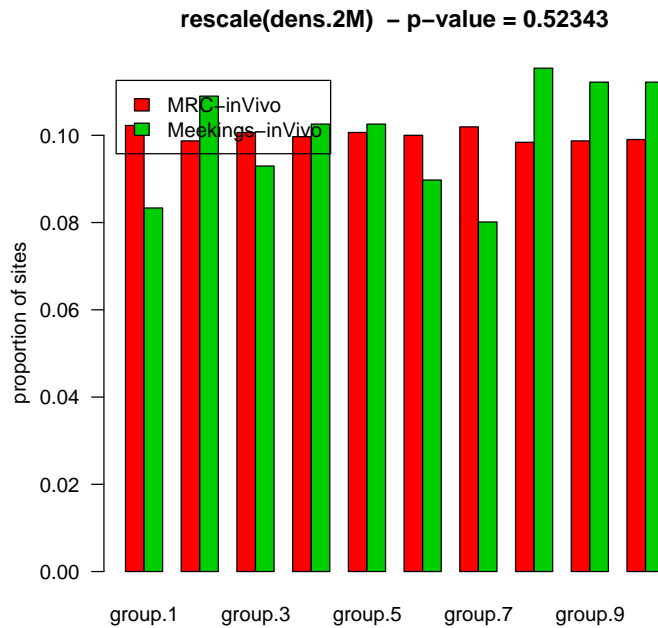

Here are the results for expression density. First, we count just genes that are in the upper half.

Category limits

|    | lower         | category | upper         |
|----|---------------|----------|---------------|
| 1  | -0.9193454120 | group.1  | -0.8012857978 |
| 2  | -0.8012857978 | group.2  | -0.6005260082 |
| 3  | -0.6005260082 | group.3  | -0.4021040327 |
| 4  | -0.4021040327 | group.4  | -0.2001753361 |
| 5  | -0.2001753361 | group.5  | -0.0002922268 |
| 6  | -0.0002922268 | group.6  | 0.2001168907  |
| 7  | 0.2001168907  | group.7  | 0.3998831093  |
| 8  | 0.3998831093  | group.8  | 0.5998246639  |
| 9  | 0.5998246639  | group.9  | 0.7997662186  |
| 10 | 0.7997662186  | group.10 | 0.9997077732  |

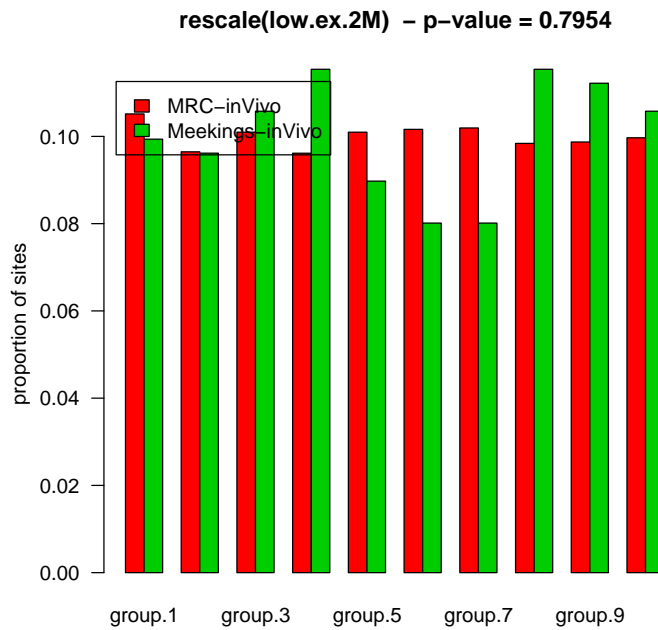

Now we count genes in the upper  $1/8^{th}$ :

Category limits

|   | lower      | category | upper      |
|---|------------|----------|------------|
| 1 | -0.8664524 | group.1  | -0.5990649 |
| 2 | -0.5990649 | group.2  | -0.3994740 |
| 3 | -0.3994740 | group.3  | -0.1998831 |
| 4 | -0.1998831 | group.4  | 0.0000000  |
| 5 | 0.0000000  | group.5  | 0.1999416  |
| 6 | 0.1999416  | group.6  | 0.3997662  |
| 7 | 0.3997662  | group.7  | 0.6000584  |
| 8 | 0.6000584  | group.8  | 0.7997370  |
| 9 | 0.7997370  | group.9  | 0.9997078  |

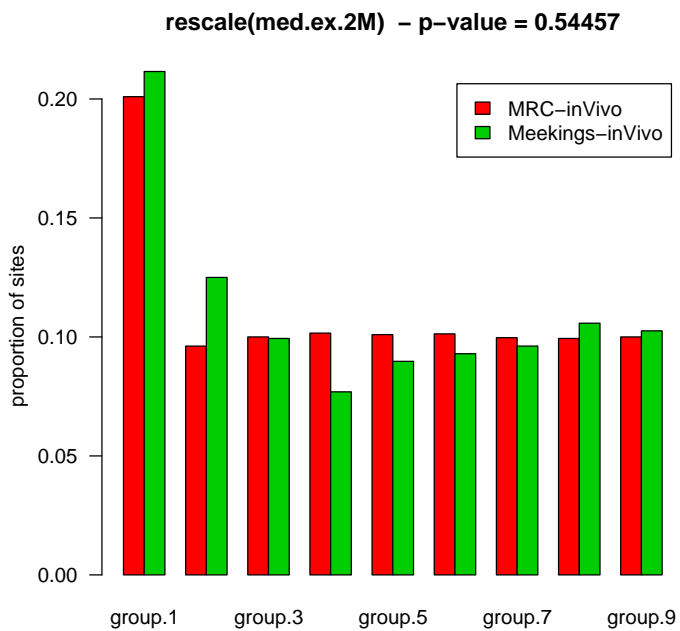

And here we count genes in the upper 1/16<sup>th</sup>:

Category limits

|   | lower        | category | upper        |
|---|--------------|----------|--------------|
| 1 | -0.793395675 | group.1  | -0.433956750 |
| 2 | -0.433956750 | group.2  | -0.228521333 |
| 3 | -0.228521333 | group.3  | 0.002630041  |
| 4 | 0.002630041  | group.4  | 0.200116891  |
| 5 | 0.200116891  | group.5  | 0.400642899  |
| 6 | 0.400642899  | group.6  | 0.599941555  |
| 7 | 0.599941555  | group.7  | 0.798071303  |
| 8 | 0.798071303  | group.8  | 0.999707773  |

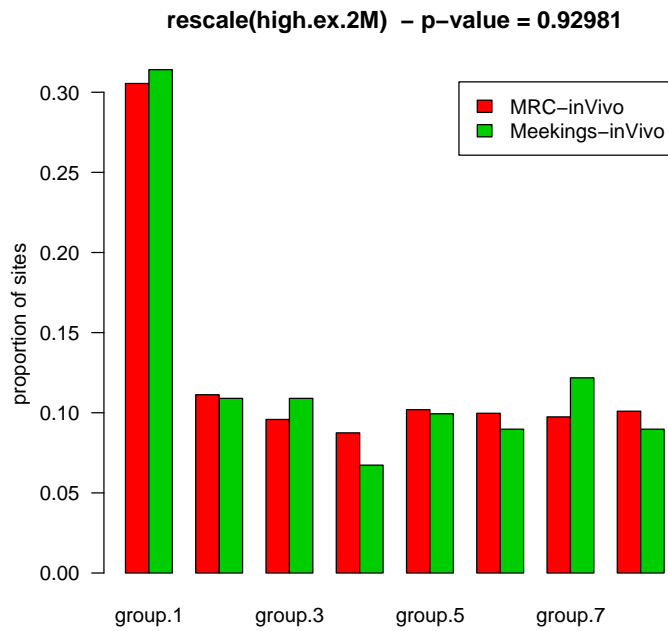

Here the effect of density of CpG islands is studied:

Category limits

|    | lower       | category | upper       |
|----|-------------|----------|-------------|
| 1  | -0.99649328 | group.1  | -0.79514904 |
| 2  | -0.79514904 | group.2  | -0.61572180 |
| 3  | -0.61572180 | group.3  | -0.40882525 |
| 4  | -0.40882525 | group.4  | -0.21741672 |
| 5  | -0.21741672 | group.5  | -0.01431911 |
| 6  | -0.01431911 | group.6  | 0.20017534  |
| 7  | 0.20017534  | group.7  | 0.39392168  |
| 8  | 0.39392168  | group.8  | 0.60081823  |
| 9  | 0.60081823  | group.9  | 0.80040912  |
| 10 | 0.80040912  | group.10 | 0.99970777  |

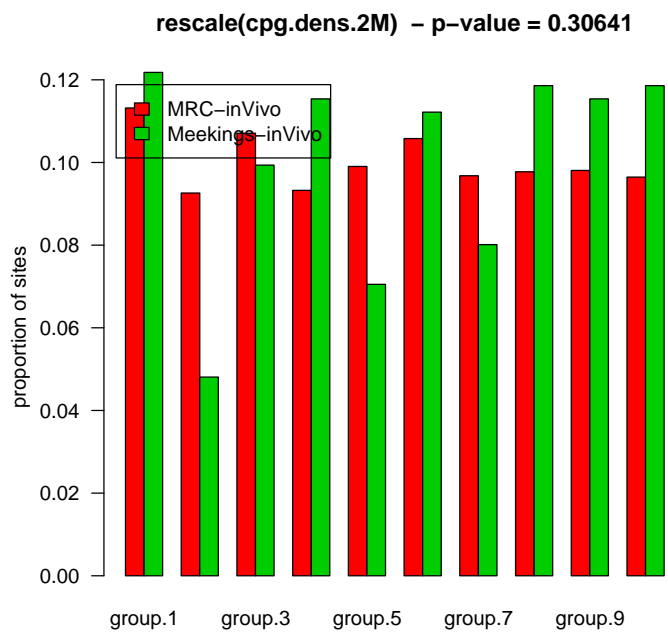



## 4.12 4 megaBase Window

In the barplot that follows we examine the association of insertion sites with expression density in a 4 megabase window surrounding each locus. First, we count just the number of genes on the represented on the chip.

Category limits

|    | lower      | category | upper      |
|----|------------|----------|------------|
| 1  | -0.9994155 | group.1  | -0.7995324 |
| 2  | -0.7995324 | group.2  | -0.5996493 |
| 3  | -0.5996493 | group.3  | -0.3998831 |
| 4  | -0.3998831 | group.4  | -0.1992987 |
| 5  | -0.1992987 | group.5  | 0.0000000  |
| 6  | 0.0000000  | group.6  | 0.1999416  |
| 7  | 0.1999416  | group.7  | 0.3998831  |
| 8  | 0.3998831  | group.8  | 0.5998247  |
| 9  | 0.5998247  | group.9  | 0.7997662  |
| 10 | 0.7997662  | group.10 | 0.9997078  |

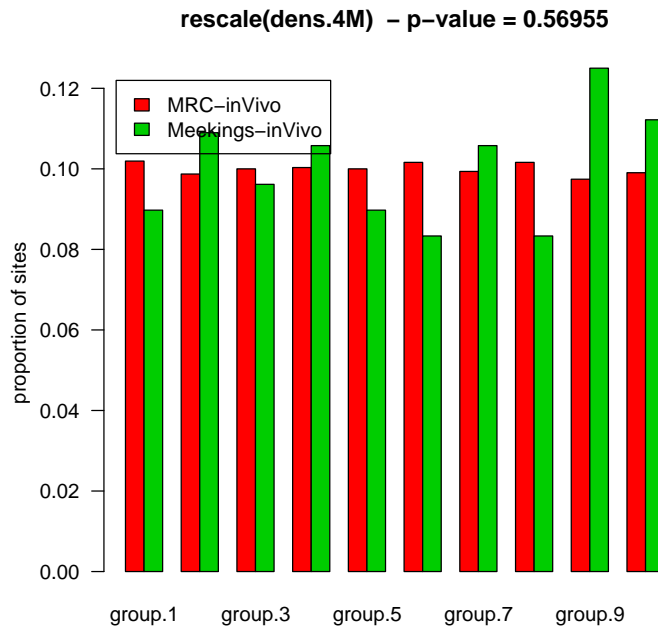

Here are the results for expression density. First, we count just genes that are in the upper half.

Category limits

|    | lower         | category | upper         |
|----|---------------|----------|---------------|
| 1  | -0.9795441262 | group.1  | -0.8000292227 |
| 2  | -0.8000292227 | group.2  | -0.5996493279 |
| 3  | -0.5996493279 | group.3  | -0.3997954413 |
| 4  | -0.3997954413 | group.4  | -0.1998246639 |
| 5  | -0.1998246639 | group.5  | -0.0002922268 |
| 6  | -0.0002922268 | group.6  | 0.1999415546  |
| 7  | 0.1999415546  | group.7  | 0.3998831093  |
| 8  | 0.3998831093  | group.8  | 0.5998246639  |
| 9  | 0.5998246639  | group.9  | 0.7997662186  |
| 10 | 0.7997662186  | group.10 | 0.9997077732  |

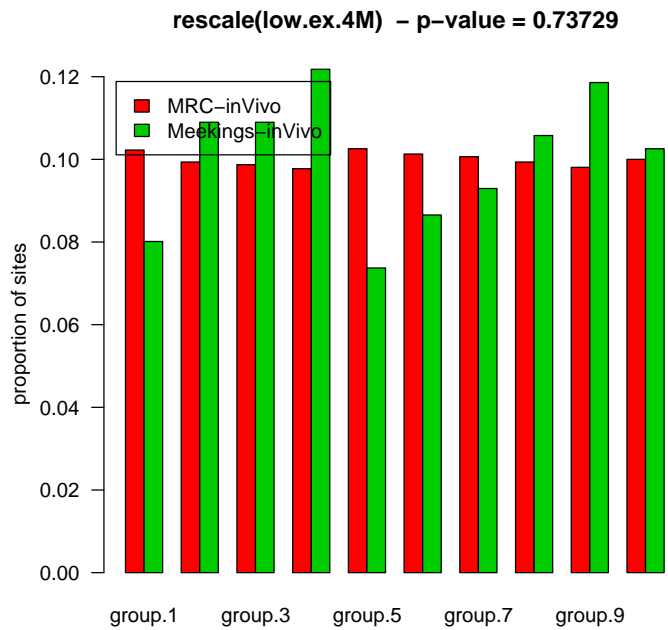

Now we count genes in the upper 1/8<sup>th</sup>:

Category limits

|    | lower      | category | upper      |
|----|------------|----------|------------|
| 1  | -0.9605494 | group.1  | -0.7995324 |
| 2  | -0.7995324 | group.2  | -0.5997078 |
| 3  | -0.5997078 | group.3  | -0.3994740 |
| 4  | -0.3994740 | group.4  | -0.2001753 |
| 5  | -0.2001753 | group.5  | 0.0000000  |
| 6  | 0.0000000  | group.6  | 0.1995909  |
| 7  | 0.1995909  | group.7  | 0.3997662  |
| 8  | 0.3997662  | group.8  | 0.5999416  |
| 9  | 0.5999416  | group.9  | 0.8000292  |
| 10 | 0.8000292  | group.10 | 0.9997078  |

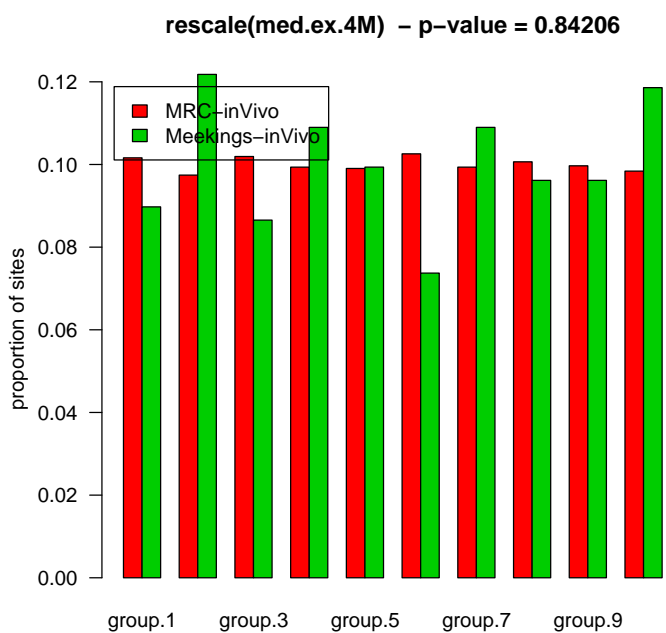

And here we count genes in the upper 1/16<sup>th</sup>:

Category limits

|    | lower      | category | upper      |
|----|------------|----------|------------|
| 1  | -0.9292811 | group.1  | -0.7863822 |
| 2  | -0.7863822 | group.2  | -0.6022794 |
| 3  | -0.6022794 | group.3  | -0.3804793 |
| 4  | -0.3804793 | group.4  | -0.1999416 |
| 5  | -0.1999416 | group.5  | 0.0000000  |
| 6  | 0.0000000  | group.6  | 0.2004676  |
| 7  | 0.2004676  | group.7  | 0.3998831  |
| 8  | 0.3998831  | group.8  | 0.5998247  |
| 9  | 0.5998247  | group.9  | 0.7997662  |
| 10 | 0.7997662  | group.10 | 0.9997078  |

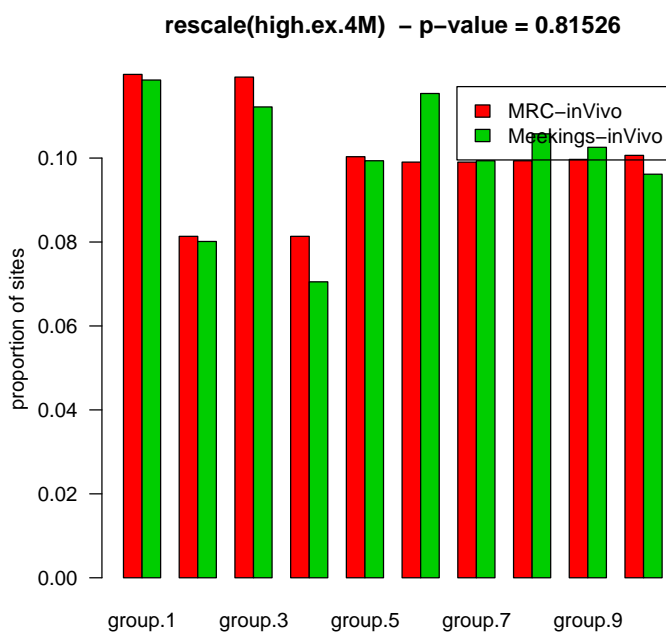

Here the effect of density of CpG islands is studied:

Category limits

|    | lower         | category | upper         |
|----|---------------|----------|---------------|
| 1  | -0.9997077732 | group.1  | -0.8067212157 |
| 2  | -0.8067212157 | group.2  | -0.6028638223 |
| 3  | -0.6028638223 | group.3  | -0.3886616014 |
| 4  | -0.3886616014 | group.4  | -0.1946230275 |
| 5  | -0.1946230275 | group.5  | 0.0002922268  |
| 6  | 0.0002922268  | group.6  | 0.2019286967  |
| 7  | 0.2019286967  | group.7  | 0.3974284044  |
| 8  | 0.3974284044  | group.8  | 0.5967270602  |
| 9  | 0.5967270602  | group.9  | 0.8009935710  |
| 10 | 0.8009935710  | group.10 | 0.9997077732  |

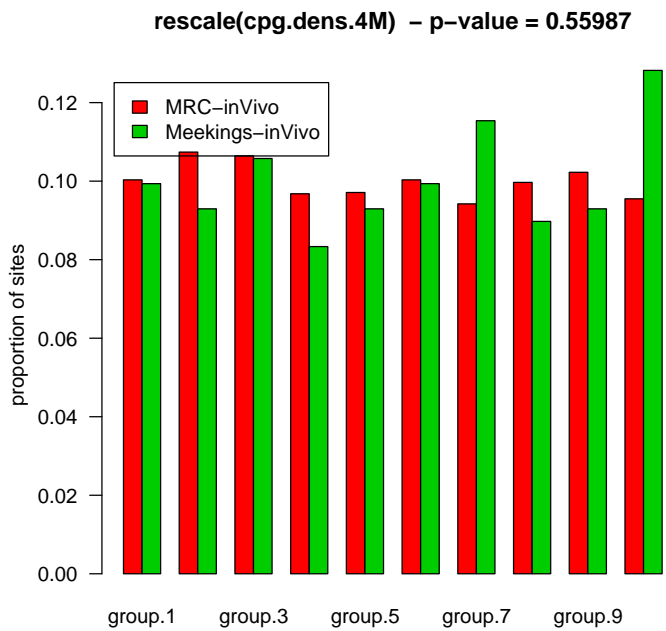

### 4.13 8 megaBase Window

In the barplot that follows we examine the association of insertion sites with expression density in a 8 megabase window surrounding each locus. First, we count just the number of genes on the represented on the chip.

Category limits

|    | lower      | category | upper      |
|----|------------|----------|------------|
| 1  | -0.9997078 | group.1  | -0.7995324 |
| 2  | -0.7995324 | group.2  | -0.5996493 |
| 3  | -0.5996493 | group.3  | -0.3998831 |
| 4  | -0.3998831 | group.4  | -0.1999416 |
| 5  | -0.1999416 | group.5  | 0.0000000  |
| 6  | 0.0000000  | group.6  | 0.1999416  |
| 7  | 0.1999416  | group.7  | 0.4000877  |
| 8  | 0.4000877  | group.8  | 0.5998247  |
| 9  | 0.5998247  | group.9  | 0.7997662  |
| 10 | 0.7997662  | group.10 | 0.9997078  |

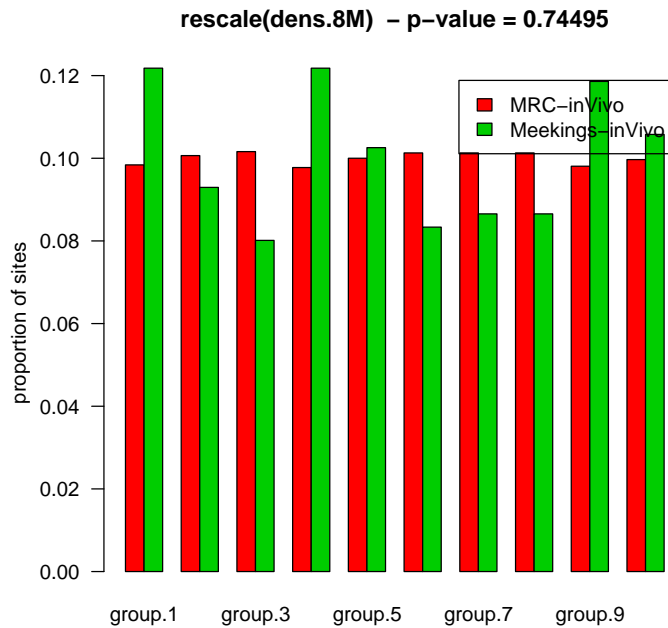

Here are the results for expression density. First, we count just genes that are in the upper half.

Category limits

|    | lower      | category | upper      |
|----|------------|----------|------------|
| 1  | -0.9985389 | group.1  | -0.7995324 |
| 2  | -0.7995324 | group.2  | -0.6000000 |
| 3  | -0.6000000 | group.3  | -0.3998831 |
| 4  | -0.3998831 | group.4  | -0.1999416 |
| 5  | -0.1999416 | group.5  | 0.0000000  |
| 6  | 0.0000000  | group.6  | 0.2002922  |
| 7  | 0.2002922  | group.7  | 0.3998831  |
| 8  | 0.3998831  | group.8  | 0.5998247  |
| 9  | 0.5998247  | group.9  | 0.7997370  |
| 10 | 0.7997370  | group.10 | 0.9997078  |

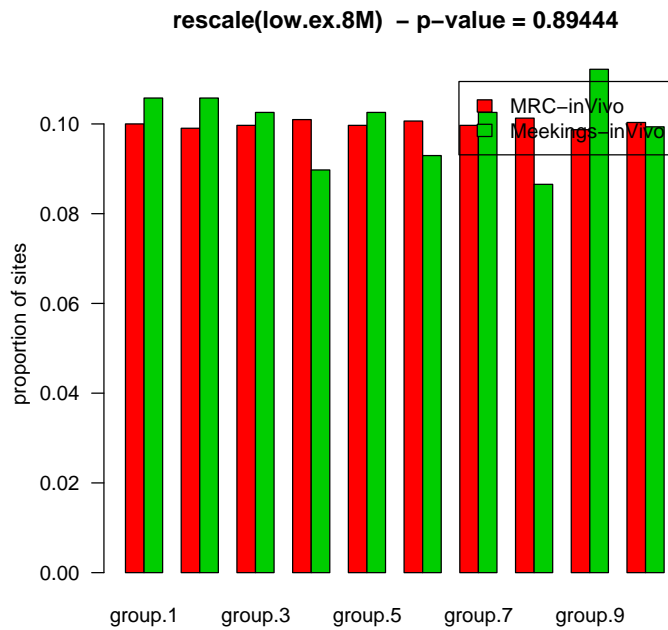

Now we count genes in the upper  $1/8^{th}$ :

Category limits

|    | lower      | category | upper      |
|----|------------|----------|------------|
| 1  | -0.9950321 | group.1  | -0.8002922 |
| 2  | -0.8002922 | group.2  | -0.5998247 |
| 3  | -0.5998247 | group.3  | -0.3998831 |
| 4  | -0.3998831 | group.4  | -0.1998831 |
| 5  | -0.1998831 | group.5  | 0.0000000  |
| 6  | 0.0000000  | group.6  | 0.1999416  |
| 7  | 0.1999416  | group.7  | 0.4000877  |
| 8  | 0.4000877  | group.8  | 0.5998247  |
| 9  | 0.5998247  | group.9  | 0.7997662  |
| 10 | 0.7997662  | group.10 | 0.9997078  |

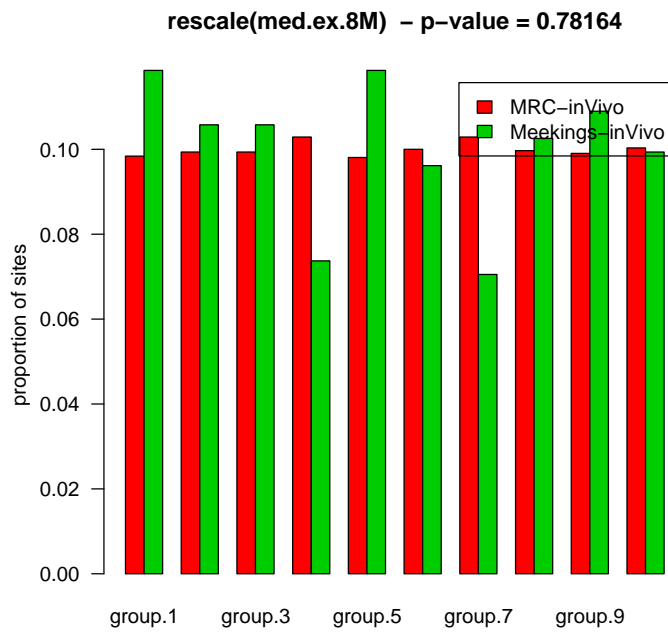



And here we count genes in the upper 1/16<sup>th</sup>:

Category limits

|    | lower      | category | upper      |
|----|------------|----------|------------|
| 1  | -0.9845120 | group.1  | -0.8013442 |
| 2  | -0.8013442 | group.2  | -0.5998247 |
| 3  | -0.5998247 | group.3  | -0.3998831 |
| 4  | -0.3998831 | group.4  | -0.2001753 |
| 5  | -0.2001753 | group.5  | 0.0000000  |
| 6  | 0.0000000  | group.6  | 0.1999416  |
| 7  | 0.1999416  | group.7  | 0.4003507  |
| 8  | 0.4003507  | group.8  | 0.5998247  |
| 9  | 0.5998247  | group.9  | 0.8000292  |
| 10 | 0.8000292  | group.10 | 0.9988311  |

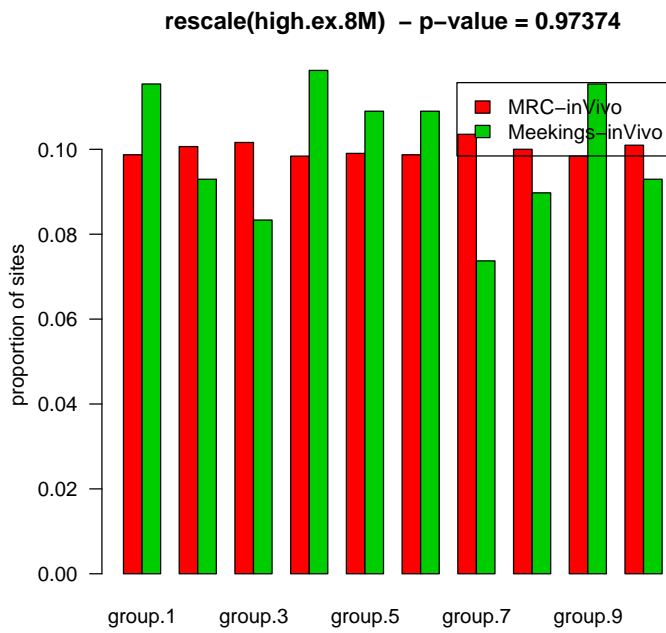

Here the effect of density of CpG islands is studied:

Category limits

|    | lower        | category | upper        |
|----|--------------|----------|--------------|
| 1  | -0.999707773 | group.1  | -0.794564582 |
| 2  | -0.794564582 | group.2  | -0.596434833 |
| 3  | -0.596434833 | group.3  | -0.395382817 |
| 4  | -0.395382817 | group.4  | -0.203682057 |
| 5  | -0.203682057 | group.5  | 0.001168907  |
| 6  | 0.001168907  | group.6  | 0.196084161  |
| 7  | 0.196084161  | group.7  | 0.399766219  |
| 8  | 0.399766219  | group.8  | 0.599357101  |
| 9  | 0.599357101  | group.9  | 0.799824664  |
| 10 | 0.799824664  | group.10 | 0.999707773  |

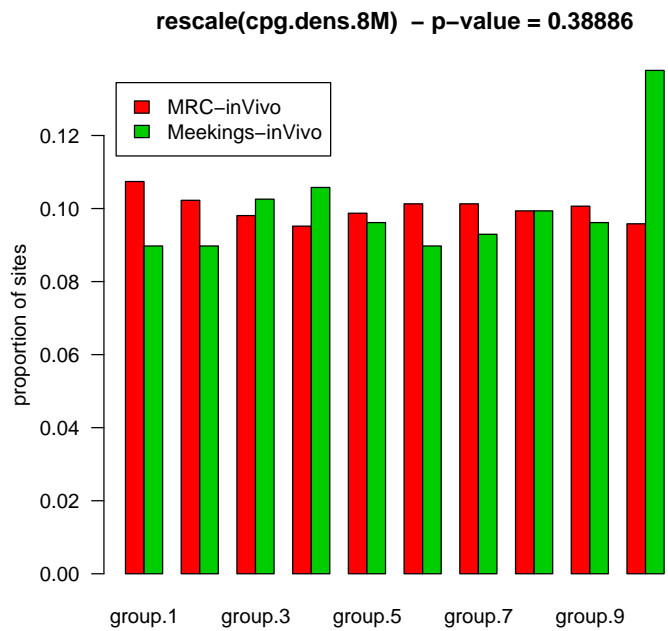

#### 4.14 16 megaBase Window

In the barplot that follows we examine the association of insertion sites with expression density in a 16 megabase window surrounding each locus. First, we count just the number of genes on the represented on the chip.

Category limits

|    | lower      | category | upper      |
|----|------------|----------|------------|
| 1  | -0.9997078 | group.1  | -0.7997370 |
| 2  | -0.7997370 | group.2  | -0.5998247 |
| 3  | -0.5998247 | group.3  | -0.3994740 |
| 4  | -0.3994740 | group.4  | -0.1998247 |
| 5  | -0.1998247 | group.5  | 0.0000000  |
| 6  | 0.0000000  | group.6  | 0.1999416  |
| 7  | 0.1999416  | group.7  | 0.3998831  |
| 8  | 0.3998831  | group.8  | 0.5998247  |
| 9  | 0.5998247  | group.9  | 0.7997662  |
| 10 | 0.7997662  | group.10 | 0.9997078  |

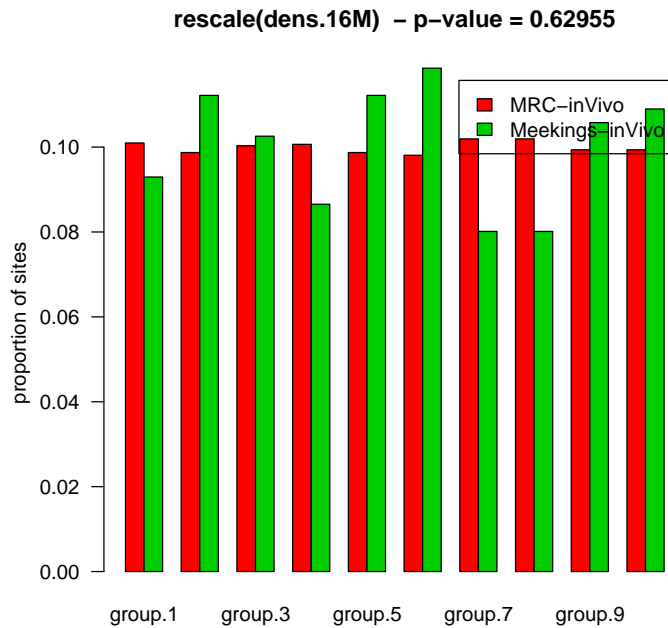

Here are the results for expression density. First, we count just genes that are in the upper half.

Category limits

|    | lower         | category | upper         |
|----|---------------|----------|---------------|
| 1  | -0.9994155465 | group.1  | -0.7997662186 |
| 2  | -0.7997662186 | group.2  | -0.5993571011 |
| 3  | -0.5993571011 | group.3  | -0.4007013442 |
| 4  | -0.4007013442 | group.4  | -0.1998831093 |
| 5  | -0.1998831093 | group.5  | -0.0001461134 |
| 6  | -0.0001461134 | group.6  | 0.1998246639  |
| 7  | 0.1998246639  | group.7  | 0.3997662186  |
| 8  | 0.3997662186  | group.8  | 0.6000584454  |
| 9  | 0.6000584454  | group.9  | 0.8000292227  |
| 10 | 0.8000292227  | group.10 | 0.9997077732  |

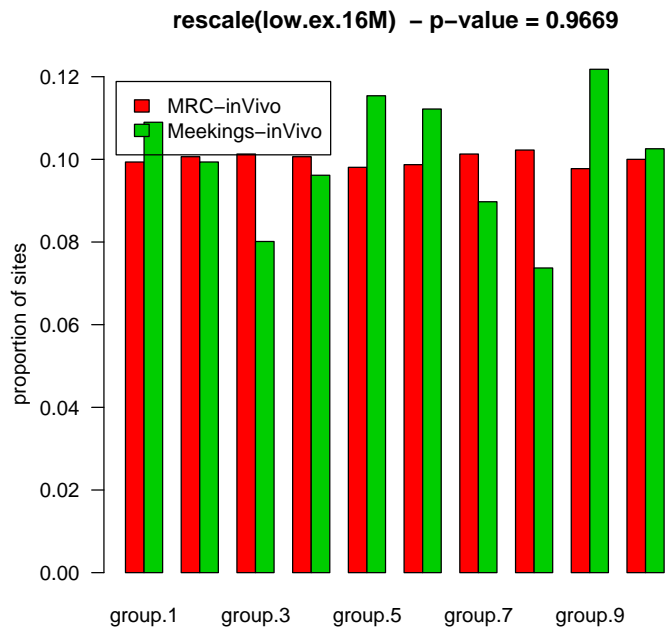

Now we count genes in the upper 1/8<sup>th</sup>:

Category limits

|    | lower      | category | upper      |
|----|------------|----------|------------|
| 1  | -0.9997078 | group.1  | -0.8005552 |
| 2  | -0.8005552 | group.2  | -0.5996493 |
| 3  | -0.5996493 | group.3  | -0.3998831 |
| 4  | -0.3998831 | group.4  | -0.2001753 |
| 5  | -0.2001753 | group.5  | 0.0000000  |
| 6  | 0.0000000  | group.6  | 0.1999416  |
| 7  | 0.1999416  | group.7  | 0.3997954  |
| 8  | 0.3997954  | group.8  | 0.6000584  |
| 9  | 0.6000584  | group.9  | 0.7997662  |
| 10 | 0.7997662  | group.10 | 0.9997078  |

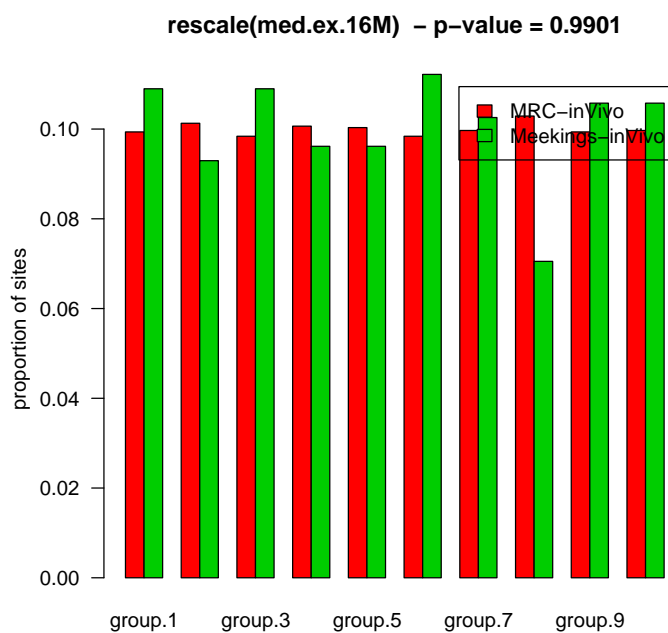

And here we count genes in the upper 1/16<sup>th</sup>:

Category limits

|    | lower         | category | upper         |
|----|---------------|----------|---------------|
| 1  | -0.9991233197 | group.1  | -0.7986557569 |
| 2  | -0.7986557569 | group.2  | -0.5997077732 |
| 3  | -0.5997077732 | group.3  | -0.3997662186 |
| 4  | -0.3997662186 | group.4  | -0.1998831093 |
| 5  | -0.1998831093 | group.5  | -0.0001461134 |
| 6  | -0.0001461134 | group.6  | 0.1997077732  |
| 7  | 0.1997077732  | group.7  | 0.3994739918  |
| 8  | 0.3994739918  | group.8  | 0.6000000000  |
| 9  | 0.6000000000  | group.9  | 0.7997077732  |
| 10 | 0.7997077732  | group.10 | 0.9997077732  |

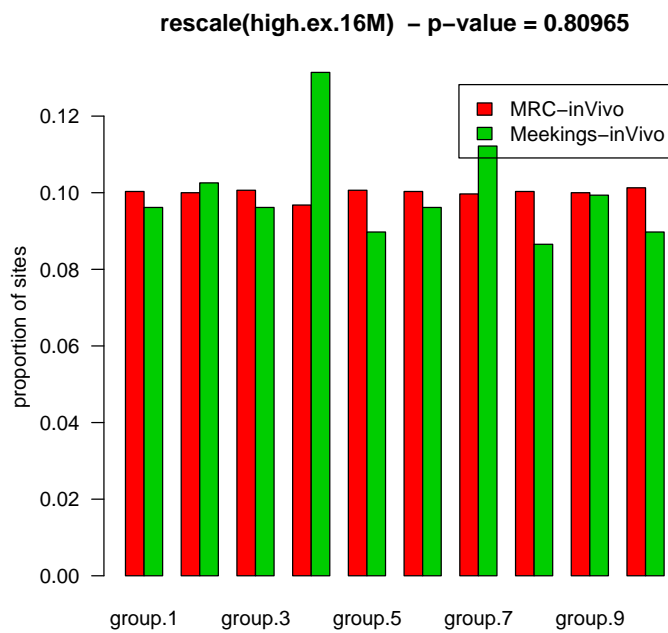

Here the effect of density of CpG islands is studied:

Category limits

|    | lower        | category | upper        |
|----|--------------|----------|--------------|
| 1  | -0.999123320 | group.1  | -0.796317943 |
| 2  | -0.796317943 | group.2  | -0.597311514 |
| 3  | -0.597311514 | group.3  | -0.395967271 |
| 4  | -0.395967271 | group.4  | -0.201052016 |
| 5  | -0.201052016 | group.5  | -0.003214494 |
| 6  | -0.003214494 | group.6  | 0.199006429  |
| 7  | 0.199006429  | group.7  | 0.399883109  |
| 8  | 0.399883109  | group.8  | 0.600058445  |
| 9  | 0.600058445  | group.9  | 0.799736996  |
| 10 | 0.799736996  | group.10 | 0.999707773  |

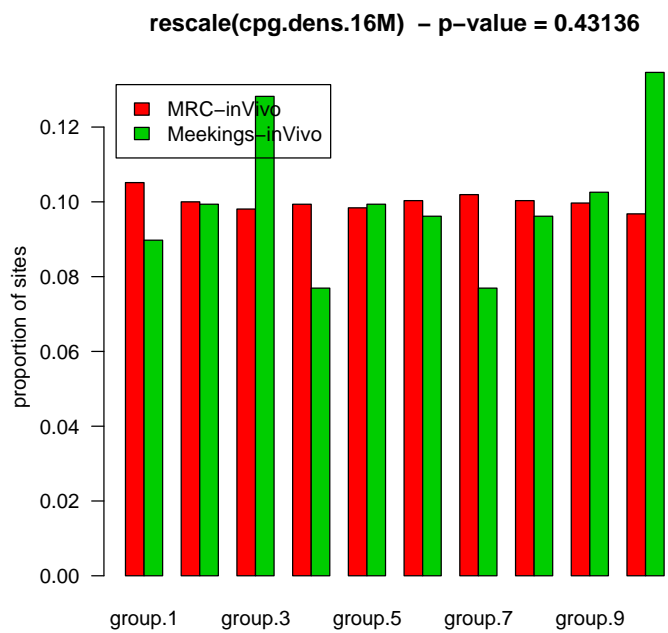

## 4.15 32 megaBase Window

In the barplot that follows we examine the association of insertion sites with expression density in a 32 megabase window surrounding each locus. First, we count just the number of genes on the represented on the chip.

Category limits

|    | lower      | category | upper      |
|----|------------|----------|------------|
| 1  | -0.9994155 | group.1  | -0.7995324 |
| 2  | -0.7995324 | group.2  | -0.5996493 |
| 3  | -0.5996493 | group.3  | -0.3998831 |
| 4  | -0.3998831 | group.4  | -0.1999416 |
| 5  | -0.1999416 | group.5  | 0.0000000  |
| 6  | 0.0000000  | group.6  | 0.1999416  |
| 7  | 0.1999416  | group.7  | 0.3998831  |
| 8  | 0.3998831  | group.8  | 0.5998247  |
| 9  | 0.5998247  | group.9  | 0.7997662  |
| 10 | 0.7997662  | group.10 | 0.9997078  |

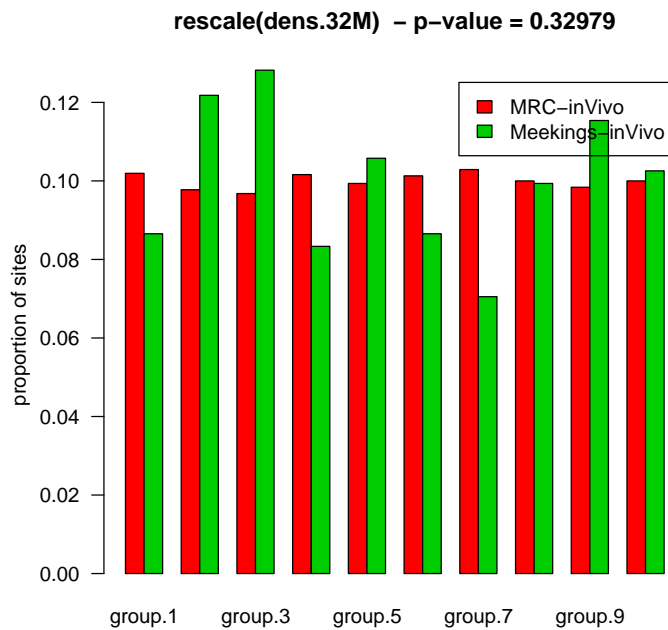



Here are the results for expression density. First, we count just genes that are in the upper half.

Category limits

|    | lower      | category | upper      |
|----|------------|----------|------------|
| 1  | -0.9994155 | group.1  | -0.7995324 |
| 2  | -0.7995324 | group.2  | -0.5998247 |
| 3  | -0.5998247 | group.3  | -0.3998831 |
| 4  | -0.3998831 | group.4  | -0.1998831 |
| 5  | -0.1998831 | group.5  | 0.0000000  |
| 6  | 0.0000000  | group.6  | 0.1998831  |
| 7  | 0.1998831  | group.7  | 0.3998831  |
| 8  | 0.3998831  | group.8  | 0.5998247  |
| 9  | 0.5998247  | group.9  | 0.7997662  |
| 10 | 0.7997662  | group.10 | 0.9997078  |

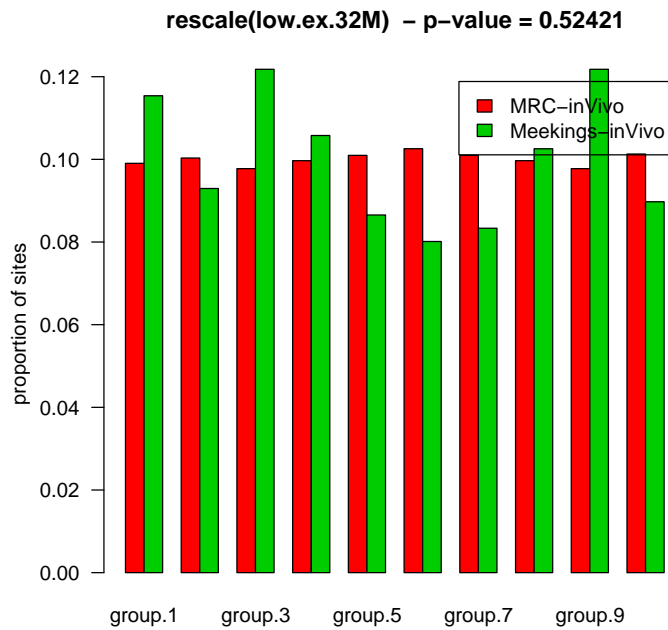

Now we count genes in the upper 1/8<sup>th</sup>:

Category limits

|    | lower      | category | upper      |
|----|------------|----------|------------|
| 1  | -0.9997078 | group.1  | -0.8000292 |
| 2  | -0.8000292 | group.2  | -0.6000584 |
| 3  | -0.6000584 | group.3  | -0.3998831 |
| 4  | -0.3998831 | group.4  | -0.1998831 |
| 5  | -0.1998831 | group.5  | 0.0000000  |
| 6  | 0.0000000  | group.6  | 0.1999416  |
| 7  | 0.1999416  | group.7  | 0.4011105  |
| 8  | 0.4011105  | group.8  | 0.5998247  |
| 9  | 0.5998247  | group.9  | 0.7997662  |
| 10 | 0.7997662  | group.10 | 0.9997078  |

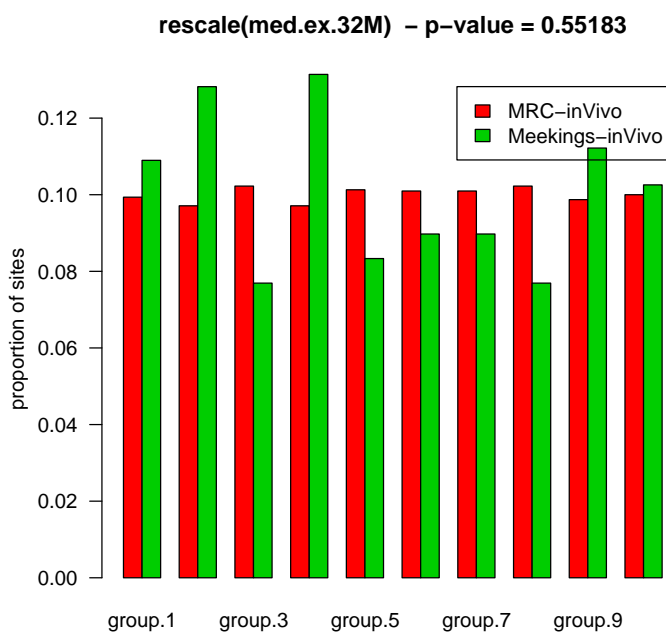

And here we count genes in the upper 1/16<sup>th</sup>:

Category limits

|    | lower         | category | upper         |
|----|---------------|----------|---------------|
| 1  | -0.9997077732 | group.1  | -0.8012857978 |
| 2  | -0.8012857978 | group.2  | -0.6002922268 |
| 3  | -0.6002922268 | group.3  | -0.3997954413 |
| 4  | -0.3997954413 | group.4  | -0.1996493279 |
| 5  | -0.1996493279 | group.5  | 0.0002922268  |
| 6  | 0.0002922268  | group.6  | 0.2004675628  |
| 7  | 0.2004675628  | group.7  | 0.3998831093  |
| 8  | 0.3998831093  | group.8  | 0.5998246639  |
| 9  | 0.5998246639  | group.9  | 0.7997662186  |
| 10 | 0.7997662186  | group.10 | 0.9997077732  |

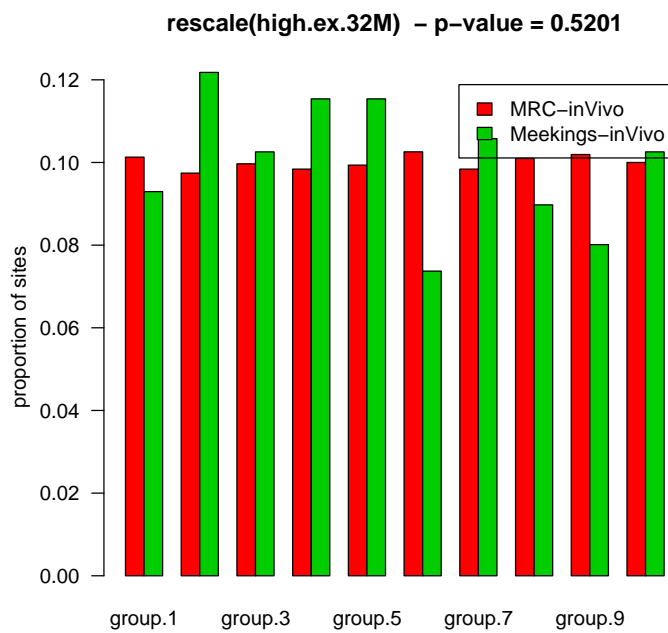

Here the effect of density of CpG islands is studied:

Category limits

|    | lower      | category | upper      |
|----|------------|----------|------------|
| 1  | -0.9997078 | group.1  | -0.8013442 |
| 2  | -0.8013442 | group.2  | -0.5987726 |
| 3  | -0.5987726 | group.3  | -0.3998831 |
| 4  | -0.3998831 | group.4  | -0.1999416 |
| 5  | -0.1999416 | group.5  | 0.0000000  |
| 6  | 0.0000000  | group.6  | 0.1999416  |
| 7  | 0.1999416  | group.7  | 0.3998831  |
| 8  | 0.3998831  | group.8  | 0.5998247  |
| 9  | 0.5998247  | group.9  | 0.7997662  |
| 10 | 0.7997662  | group.10 | 0.9997078  |

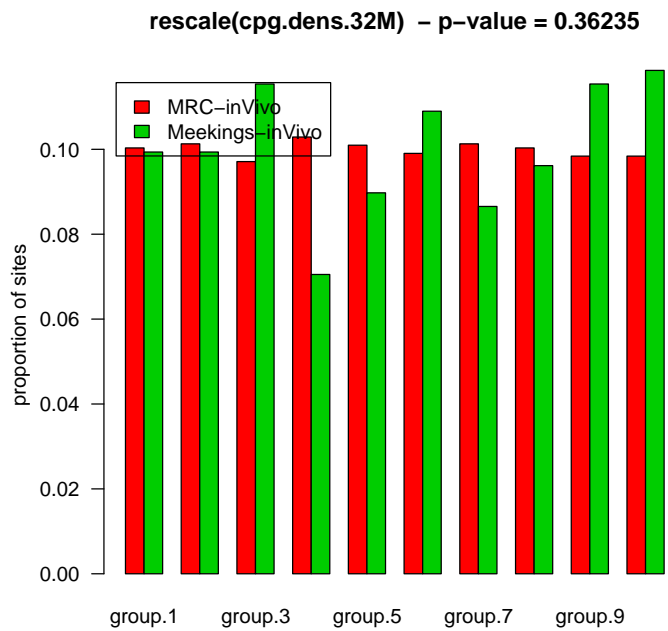

## 5 Juxtaposition with Gene Start and End Positions

### 5.1 Acembly Annotations

In this section we study the effect of juxtaposition in terms of gene start and end positions. The first barplot shows the effect of gene width for those insertions that are located within an Acembly gene.

Category limits

|    | lower    | category | upper     |
|----|----------|----------|-----------|
| 1  | 362.0    | group.1  | 14914.4   |
| 2  | 14914.4  | group.2  | 29293.0   |
| 3  | 29293.0  | group.3  | 45850.6   |
| 4  | 45850.6  | group.4  | 67381.6   |
| 5  | 67381.6  | group.5  | 96615.0   |
| 6  | 96615.0  | group.6  | 135059.4  |
| 7  | 135059.4 | group.7  | 192917.6  |
| 8  | 192917.6 | group.8  | 276257.4  |
| 9  | 276257.4 | group.9  | 437224.0  |
| 10 | 437224.0 | group.10 | 1773723.0 |

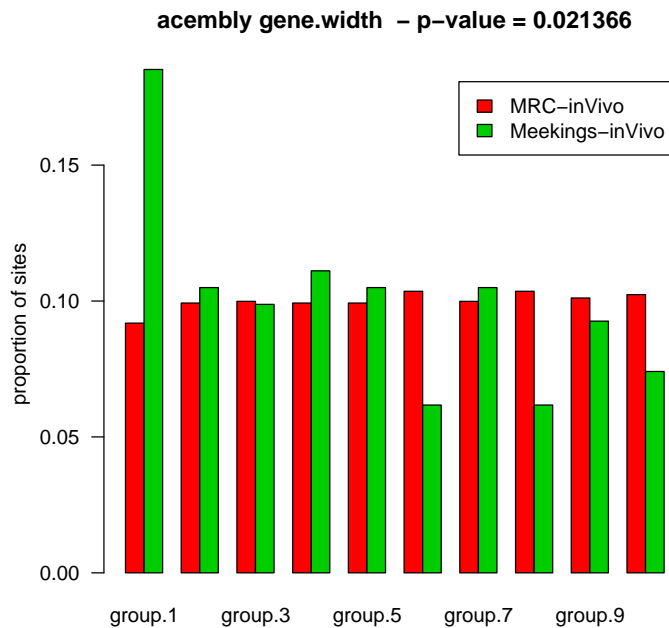

The next plot uses the width of a non-gene region for insertions that fall into such regions.

Category limits

|    | lower    | category | upper     |
|----|----------|----------|-----------|
| 1  | 120.0    | group.1  | 18615.4   |
| 2  | 18615.4  | group.2  | 34325.6   |
| 3  | 34325.6  | group.3  | 54458.8   |
| 4  | 54458.8  | group.4  | 80337.2   |
| 5  | 80337.2  | group.5  | 111311.0  |
| 6  | 111311.0 | group.6  | 150976.0  |
| 7  | 150976.0 | group.7  | 207108.6  |
| 8  | 207108.6 | group.8  | 269094.0  |
| 9  | 269094.0 | group.9  | 400207.2  |
| 10 | 400207.2 | group.10 | 4780755.0 |

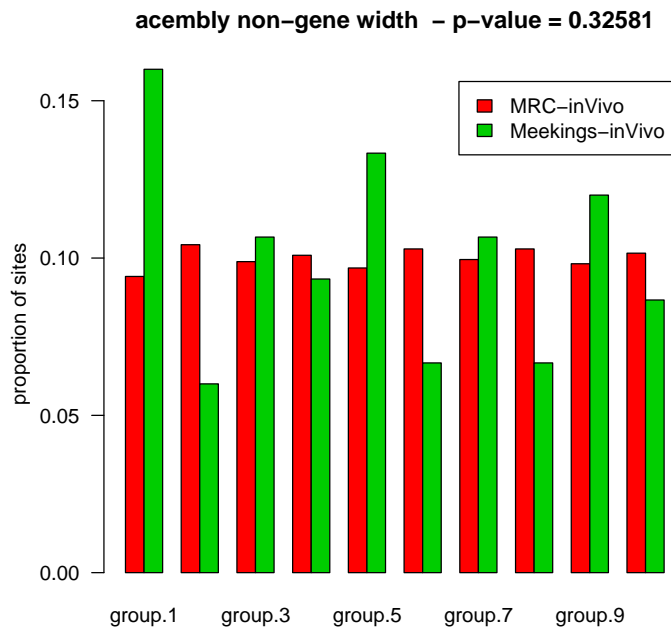

The next plot studies the distance to the nearest boundary between a gene and a non-gene region. The distance is expressed as a fraction of the length of the region. Thus, '0.25' refers to one quarter of the distance from the site to nearest boundary divided by the total width of the region.

Category limits

|    | lower        | category | upper      |
|----|--------------|----------|------------|
| 1  | 0.0001599620 | group.1  | 0.05065485 |
| 2  | 0.0506548472 | group.2  | 0.09966634 |
| 3  | 0.0996663360 | group.3  | 0.15153387 |
| 4  | 0.1515338748 | group.4  | 0.20717075 |
| 5  | 0.2071707490 | group.5  | 0.25591354 |
| 6  | 0.2559135379 | group.6  | 0.30305987 |
| 7  | 0.3030598670 | group.7  | 0.35197197 |
| 8  | 0.3519719675 | group.8  | 0.40495750 |
| 9  | 0.4049575012 | group.9  | 0.44935206 |
| 10 | 0.4493520561 | group.10 | 0.49995258 |

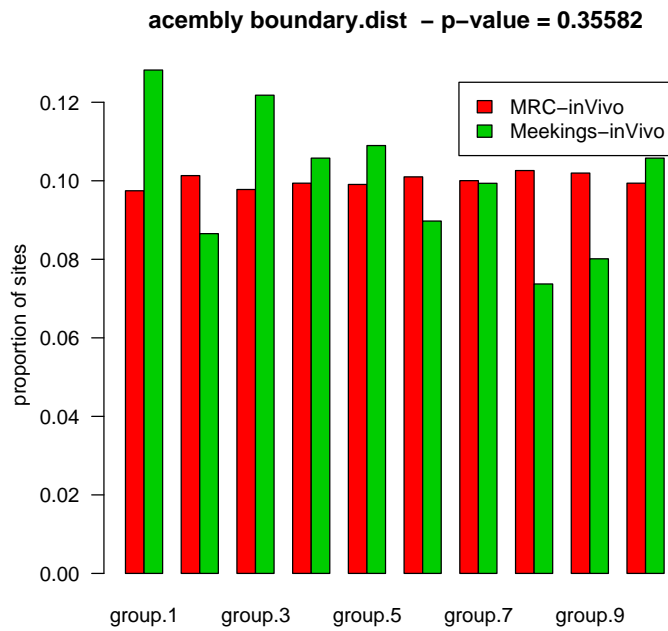

This plot studies the effect of nearness to the beginning of a transcript. For sites in genes, it is the distance to the start of the gene divided by the width of the gene. For other sites it is the distance from the site to the nearer gene if that gene boundary is also a transcription starting point. Locations near '0' are relatively near the beginning of transcription, while those near '1' are near the termination of the transcript.

Category limits

|    | lower        | category | upper      |
|----|--------------|----------|------------|
| 1  | 0.0001599620 | group.1  | 0.08509283 |
| 2  | 0.0850928327 | group.2  | 0.17859766 |
| 3  | 0.1785976559 | group.3  | 0.26783265 |
| 4  | 0.2678326511 | group.4  | 0.35353832 |
| 5  | 0.3535383217 | group.5  | 0.44178535 |
| 6  | 0.4417853523 | group.6  | 0.53280485 |
| 7  | 0.5328048532 | group.7  | 0.65234180 |
| 8  | 0.6523418049 | group.8  | 0.76360265 |
| 9  | 0.7636026508 | group.9  | 0.88528320 |
| 10 | 0.8852831985 | group.10 | 0.99982891 |

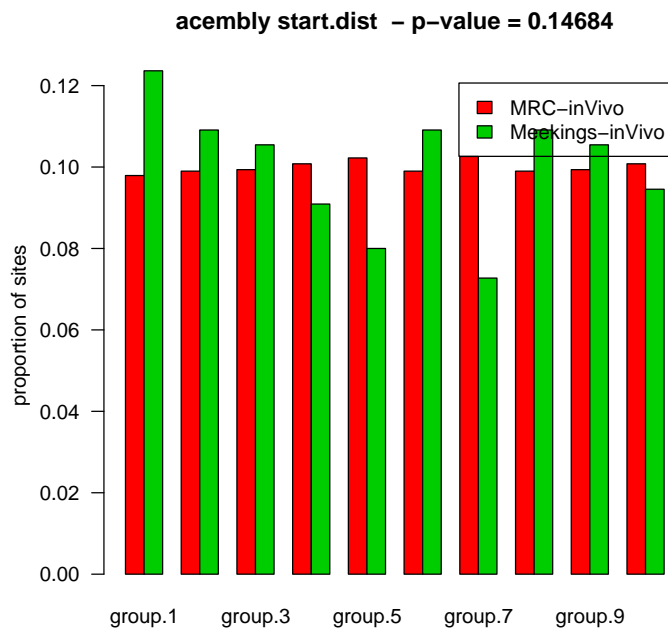



## 5.2 RefSeq Annotations

Category limits

|    | lower    | category | upper     |
|----|----------|----------|-----------|
| 1  | 534.0    | group.1  | 24949.6   |
| 2  | 24949.6  | group.2  | 47982.4   |
| 3  | 47982.4  | group.3  | 71734.4   |
| 4  | 71734.4  | group.4  | 101679.6  |
| 5  | 101679.6 | group.5  | 138009.0  |
| 6  | 138009.0 | group.6  | 193518.6  |
| 7  | 193518.6 | group.7  | 285423.8  |
| 8  | 285423.8 | group.8  | 409350.4  |
| 9  | 409350.4 | group.9  | 666493.0  |
| 10 | 666493.0 | group.10 | 2304258.0 |

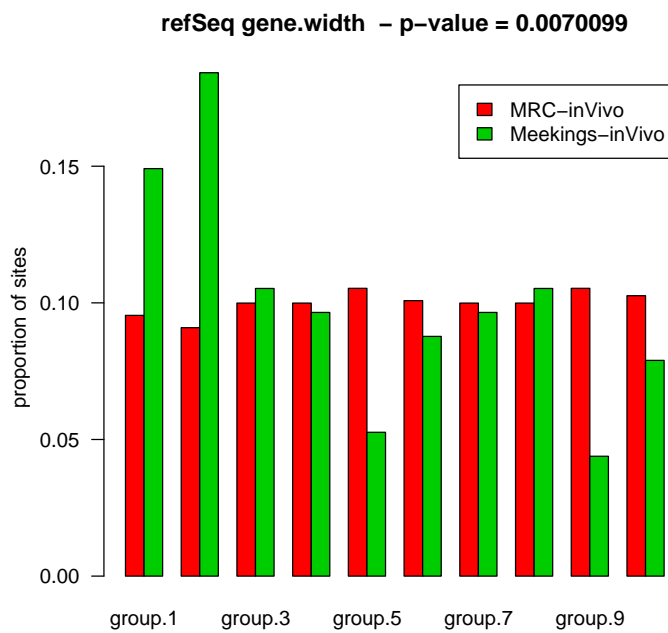

Category limits

|   | lower    | category | upper    |
|---|----------|----------|----------|
| 1 | 342.0    | group.1  | 46756.7  |
| 2 | 46756.7  | group.2  | 109550.0 |
| 3 | 109550.0 | group.3  | 202096.0 |
| 4 | 202096.0 | group.4  | 337935.0 |

|    |           |          |            |
|----|-----------|----------|------------|
| 5  | 337935.0  | group.5  | 495886.0   |
| 6  | 495886.0  | group.6  | 761648.0   |
| 7  | 761648.0  | group.7  | 1142264.7  |
| 8  | 1142264.7 | group.8  | 1660984.0  |
| 9  | 1660984.0 | group.9  | 2630125.0  |
| 10 | 2630125.0 | group.10 | 21293005.0 |

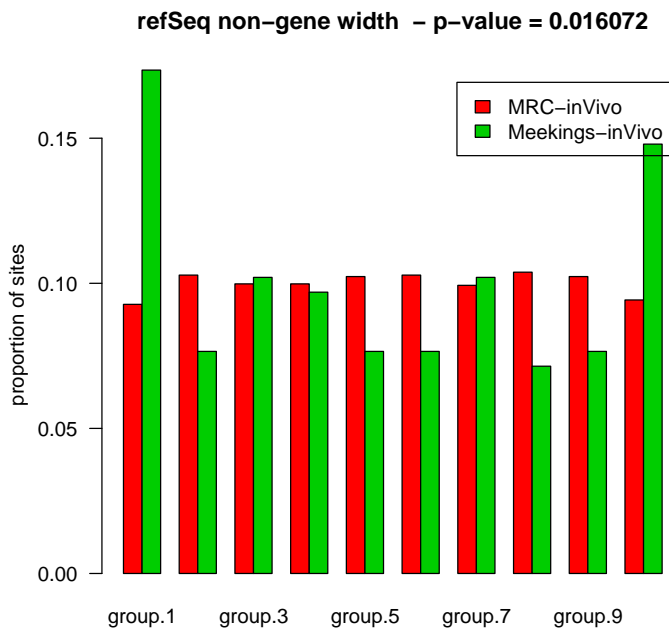

Category limits

|    | lower        | category | upper      |
|----|--------------|----------|------------|
| 1  | 3.758743e-05 | group.1  | 0.04931092 |
| 2  | 4.931092e-02 | group.2  | 0.10066226 |
| 3  | 1.006623e-01 | group.3  | 0.14852379 |
| 4  | 1.485238e-01 | group.4  | 0.20063881 |
| 5  | 2.006388e-01 | group.5  | 0.24959863 |
| 6  | 2.495986e-01 | group.6  | 0.29747416 |
| 7  | 2.974742e-01 | group.7  | 0.34532485 |
| 8  | 3.453248e-01 | group.8  | 0.39764028 |
| 9  | 3.976403e-01 | group.9  | 0.44942186 |
| 10 | 4.494219e-01 | group.10 | 0.49978476 |

refSeq boundary.dist - p-value = 0.15168

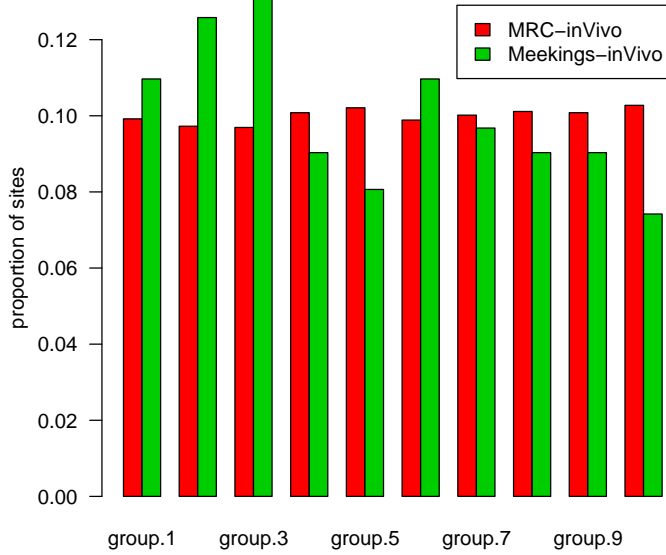

Category limits

|    | lower        | category | upper      |
|----|--------------|----------|------------|
| 1  | 7.536931e-05 | group.1  | 0.09052848 |
| 2  | 9.052848e-02 | group.2  | 0.17487493 |
| 3  | 1.748749e-01 | group.3  | 0.27143775 |
| 4  | 2.714377e-01 | group.4  | 0.35091628 |
| 5  | 3.509163e-01 | group.5  | 0.44012697 |
| 6  | 4.401270e-01 | group.6  | 0.53356580 |
| 7  | 5.335658e-01 | group.7  | 0.65260764 |
| 8  | 6.526076e-01 | group.8  | 0.76085987 |
| 9  | 7.608599e-01 | group.9  | 0.88028788 |
| 10 | 8.802879e-01 | group.10 | 0.99967333 |

refSeq start.dist - p-value = 0.15972

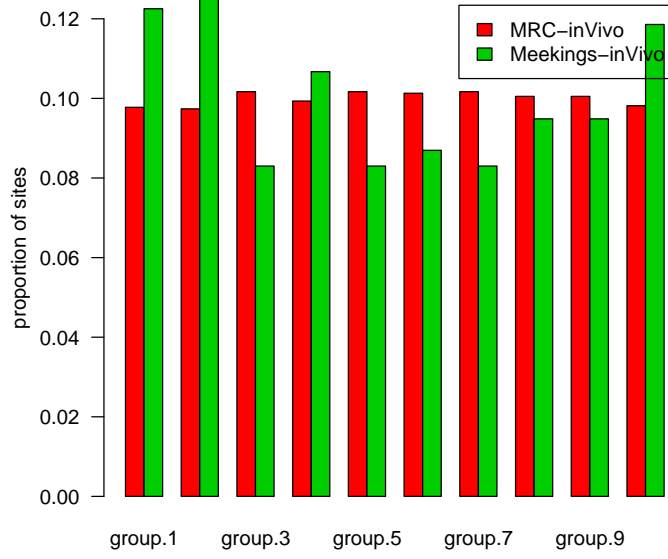

### 5.3 genScan Annotations

Category limits

|    | lower    | category | upper     |
|----|----------|----------|-----------|
| 1  | 819.0    | group.1  | 26121.5   |
| 2  | 26121.5  | group.2  | 43886.0   |
| 3  | 43886.0  | group.3  | 59298.5   |
| 4  | 59298.5  | group.4  | 77203.0   |
| 5  | 77203.0  | group.5  | 99598.0   |
| 6  | 99598.0  | group.6  | 122996.0  |
| 7  | 122996.0 | group.7  | 156757.0  |
| 8  | 156757.0 | group.8  | 206318.0  |
| 9  | 206318.0 | group.9  | 285581.5  |
| 10 | 285581.5 | group.10 | 1232888.0 |

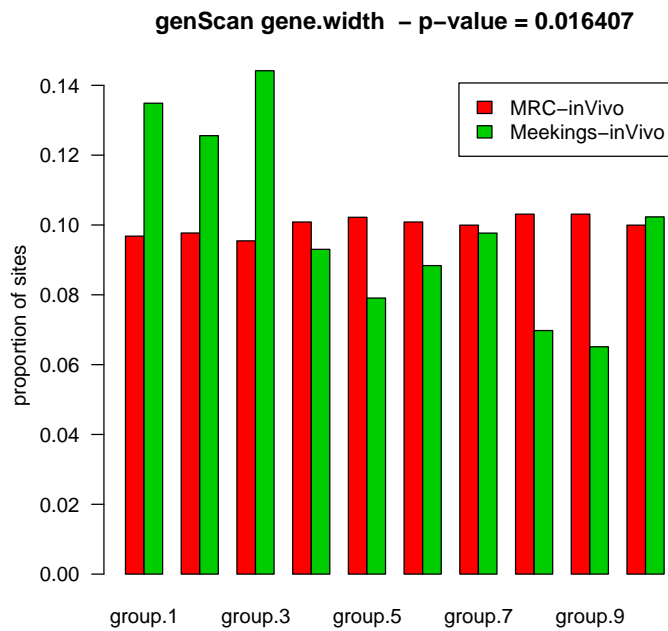

Category limits

|   | lower   | category | upper   |
|---|---------|----------|---------|
| 1 | 971.0   | group.1  | 8898.8  |
| 2 | 8898.8  | group.2  | 14437.0 |
| 3 | 14437.0 | group.3  | 19813.7 |
| 4 | 19813.7 | group.4  | 27396.4 |

|    |          |          |           |
|----|----------|----------|-----------|
| 5  | 27396.4  | group.5  | 34843.0   |
| 6  | 34843.0  | group.6  | 42776.2   |
| 7  | 42776.2  | group.7  | 55423.9   |
| 8  | 55423.9  | group.8  | 78447.4   |
| 9  | 78447.4  | group.9  | 140444.5  |
| 10 | 140444.5 | group.10 | 4642660.0 |

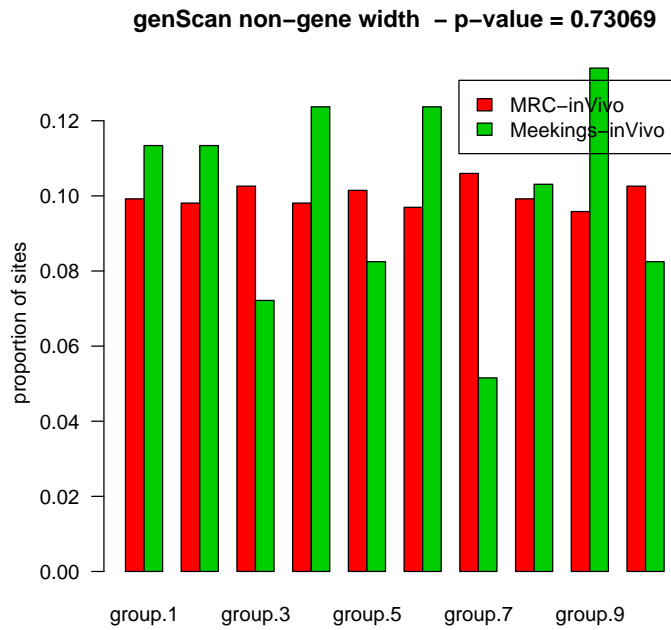

Category limits

|    | lower        | category | upper      |
|----|--------------|----------|------------|
| 1  | 8.927774e-05 | group.1  | 0.04877858 |
| 2  | 4.877858e-02 | group.2  | 0.09413327 |
| 3  | 9.413327e-02 | group.3  | 0.14633880 |
| 4  | 1.463388e-01 | group.4  | 0.20036384 |
| 5  | 2.003638e-01 | group.5  | 0.25211606 |
| 6  | 2.521161e-01 | group.6  | 0.30236608 |
| 7  | 3.023661e-01 | group.7  | 0.35404268 |
| 8  | 3.540427e-01 | group.8  | 0.40136239 |
| 9  | 4.013624e-01 | group.9  | 0.44856371 |
| 10 | 4.485637e-01 | group.10 | 0.49979502 |

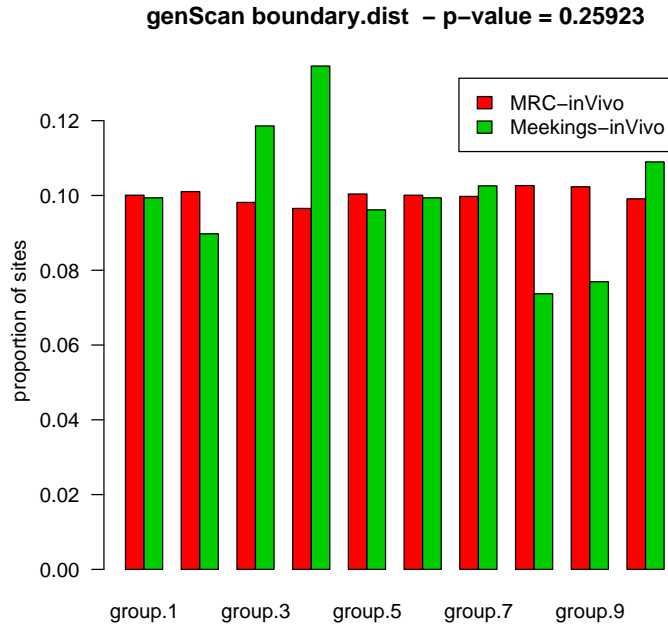

Category limits

|    | lower        | category | upper      |
|----|--------------|----------|------------|
| 1  | 0.0001007711 | group.1  | 0.08329964 |
| 2  | 0.0832996419 | group.2  | 0.18644323 |
| 3  | 0.1864432298 | group.3  | 0.28778984 |
| 4  | 0.2877898382 | group.4  | 0.37790327 |
| 5  | 0.3779032695 | group.5  | 0.47018927 |
| 6  | 0.4701892733 | group.6  | 0.57020018 |
| 7  | 0.5702001837 | group.7  | 0.67418080 |
| 8  | 0.6741807976 | group.8  | 0.78785037 |
| 9  | 0.7878503693 | group.9  | 0.89779058 |
| 10 | 0.8977905804 | group.10 | 0.99991072 |

genScan start.dist - p-value = 0.29059

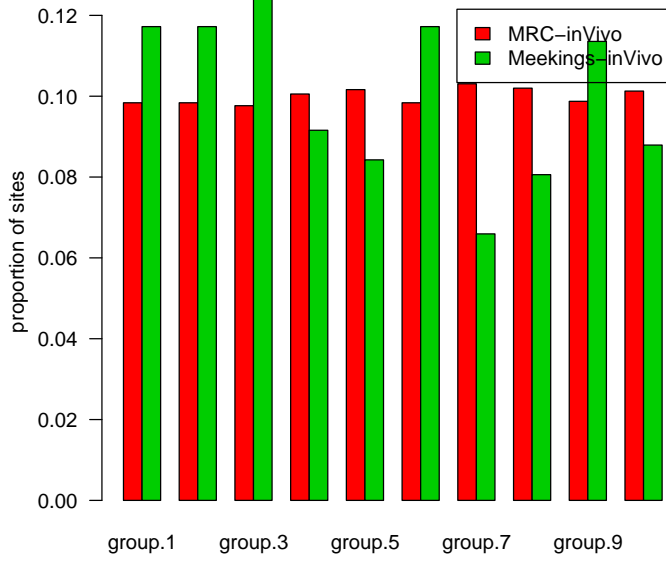



## 5.4 uniGene Annotations

Category limits

|    | lower    | category | upper     |
|----|----------|----------|-----------|
| 1  | 819.0    | group.1  | 26121.5   |
| 2  | 26121.5  | group.2  | 43886.0   |
| 3  | 43886.0  | group.3  | 59298.5   |
| 4  | 59298.5  | group.4  | 77203.0   |
| 5  | 77203.0  | group.5  | 99598.0   |
| 6  | 99598.0  | group.6  | 122996.0  |
| 7  | 122996.0 | group.7  | 156757.0  |
| 8  | 156757.0 | group.8  | 206318.0  |
| 9  | 206318.0 | group.9  | 285581.5  |
| 10 | 285581.5 | group.10 | 1232888.0 |

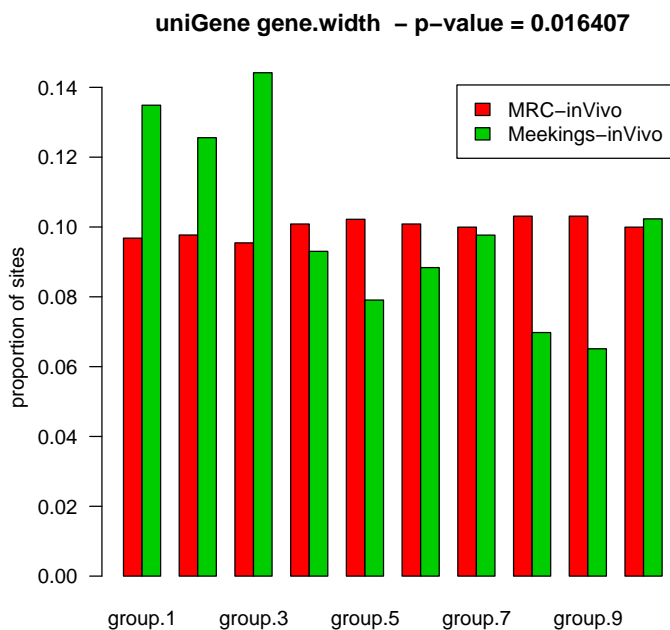

Category limits

|   | lower   | category | upper   |
|---|---------|----------|---------|
| 1 | 971.0   | group.1  | 8898.8  |
| 2 | 8898.8  | group.2  | 14437.0 |
| 3 | 14437.0 | group.3  | 19813.7 |
| 4 | 19813.7 | group.4  | 27396.4 |

|    |          |          |           |
|----|----------|----------|-----------|
| 5  | 27396.4  | group.5  | 34843.0   |
| 6  | 34843.0  | group.6  | 42776.2   |
| 7  | 42776.2  | group.7  | 55423.9   |
| 8  | 55423.9  | group.8  | 78447.4   |
| 9  | 78447.4  | group.9  | 140444.5  |
| 10 | 140444.5 | group.10 | 4642660.0 |

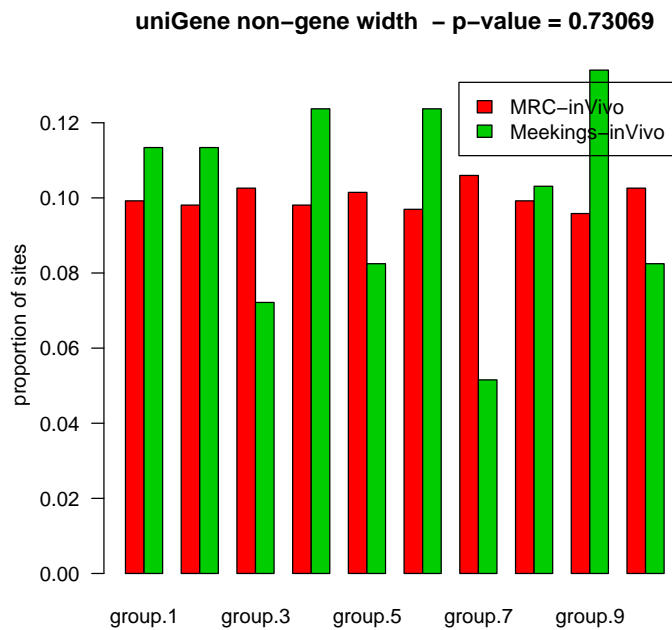

Category limits

|    | lower        | category | upper      |
|----|--------------|----------|------------|
| 1  | 8.927774e-05 | group.1  | 0.04877858 |
| 2  | 4.877858e-02 | group.2  | 0.09413327 |
| 3  | 9.413327e-02 | group.3  | 0.14633880 |
| 4  | 1.463388e-01 | group.4  | 0.20036384 |
| 5  | 2.003638e-01 | group.5  | 0.25211606 |
| 6  | 2.521161e-01 | group.6  | 0.30236608 |
| 7  | 3.023661e-01 | group.7  | 0.35404268 |
| 8  | 3.540427e-01 | group.8  | 0.40136239 |
| 9  | 4.013624e-01 | group.9  | 0.44856371 |
| 10 | 4.485637e-01 | group.10 | 0.49979502 |

uniGene boundary.dist - p-value = 0.25923

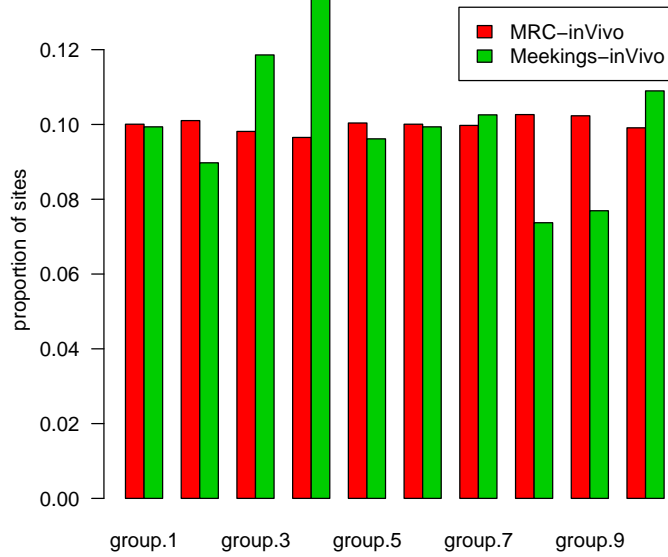

Category limits

|    | lower        | category | upper      |
|----|--------------|----------|------------|
| 1  | 0.0001007711 | group.1  | 0.08329964 |
| 2  | 0.0832996419 | group.2  | 0.18644323 |
| 3  | 0.1864432298 | group.3  | 0.28778984 |
| 4  | 0.2877898382 | group.4  | 0.37790327 |
| 5  | 0.3779032695 | group.5  | 0.47018927 |
| 6  | 0.4701892733 | group.6  | 0.57020018 |
| 7  | 0.5702001837 | group.7  | 0.67418080 |
| 8  | 0.6741807976 | group.8  | 0.78785037 |
| 9  | 0.7878503693 | group.9  | 0.89779058 |
| 10 | 0.8977905804 | group.10 | 0.99991072 |

uniGene start.dist - p-value = 0.29059



## 6 GC content

Here we study the effect of GC content on insertion. The GC content is taken from the Mouse Genome Draft at GoldenPath from the table

Following the plot is a table of fitted coefficients based on splitting the GC percent data at the median.

Category limits

|   | lower | category | upper |
|---|-------|----------|-------|
| 1 | 0.00  | group.1  | 0.25  |
| 2 | 0.25  | group.2  | 0.30  |
| 3 | 0.30  | group.3  | 0.35  |
| 4 | 0.35  | group.4  | 0.40  |
| 5 | 0.40  | group.5  | 0.45  |
| 6 | 0.45  | group.6  | 0.50  |
| 7 | 0.50  | group.7  | 0.55  |
| 8 | 0.55  | group.8  | 0.60  |
| 9 | 0.60  | group.9  | 0.85  |

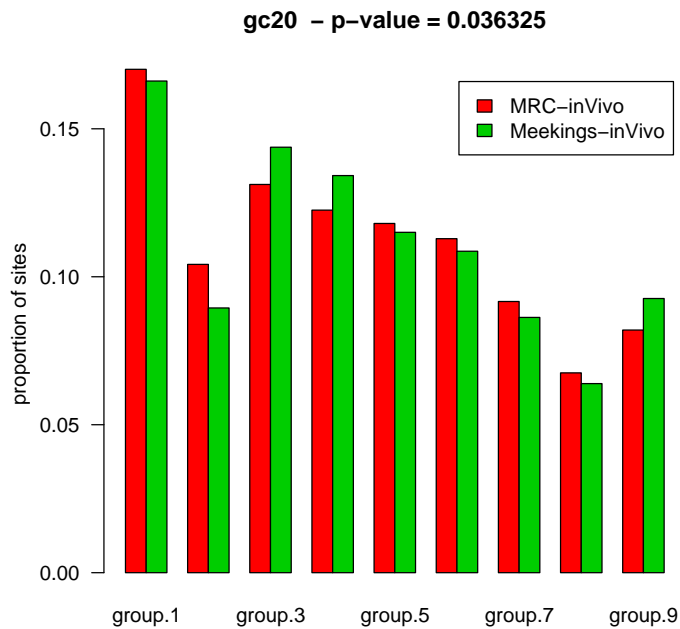

|                | coef   | se     | z      | p         |
|----------------|--------|--------|--------|-----------|
| (Intercept)    | -2.510 | 0.0858 | -29.20 | 9.33e-188 |
| eval(the.gene) | 0.443  | 0.1190 | 3.73   | 1.94e-04  |

Category limits

|    | lower | category | upper |
|----|-------|----------|-------|
| 1  | 0.04  | group.1  | 0.26  |
| 2  | 0.26  | group.2  | 0.32  |
| 3  | 0.32  | group.3  | 0.34  |
| 4  | 0.34  | group.4  | 0.38  |
| 5  | 0.38  | group.5  | 0.42  |
| 6  | 0.42  | group.6  | 0.44  |
| 7  | 0.44  | group.7  | 0.48  |
| 8  | 0.48  | group.8  | 0.52  |
| 9  | 0.52  | group.9  | 0.58  |
| 10 | 0.58  | group.10 | 0.84  |

|                | coef   | se     | z      | p         |
|----------------|--------|--------|--------|-----------|
| (Intercept)    | -2.510 | 0.0858 | -29.20 | 9.33e-188 |
| eval(the.gene) | 0.443  | 0.1190 | 3.73   | 1.94e-04  |

**gc50 - p-value = 0.62597**

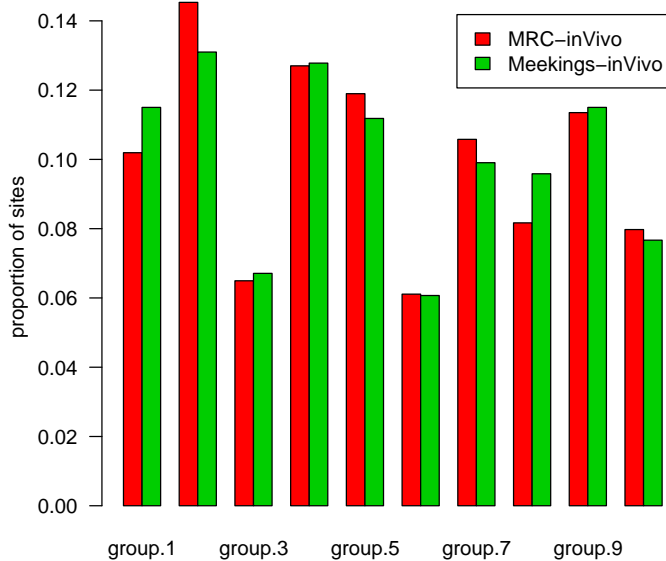

Category limits

|    | lower | category | upper |
|----|-------|----------|-------|
| 1  | 0.03  | group.1  | 0.29  |
| 2  | 0.29  | group.2  | 0.32  |
| 3  | 0.32  | group.3  | 0.35  |
| 4  | 0.35  | group.4  | 0.38  |
| 5  | 0.38  | group.5  | 0.41  |
| 6  | 0.41  | group.6  | 0.44  |
| 7  | 0.44  | group.7  | 0.47  |
| 8  | 0.47  | group.8  | 0.51  |
| 9  | 0.51  | group.9  | 0.56  |
| 10 | 0.56  | group.10 | 0.87  |

|                | coef   | se     | z      | p         |
|----------------|--------|--------|--------|-----------|
| (Intercept)    | -2.510 | 0.0858 | -29.20 | 9.33e-188 |
| eval(the.gene) | 0.443  | 0.1190 | 3.73   | 1.94e-04  |

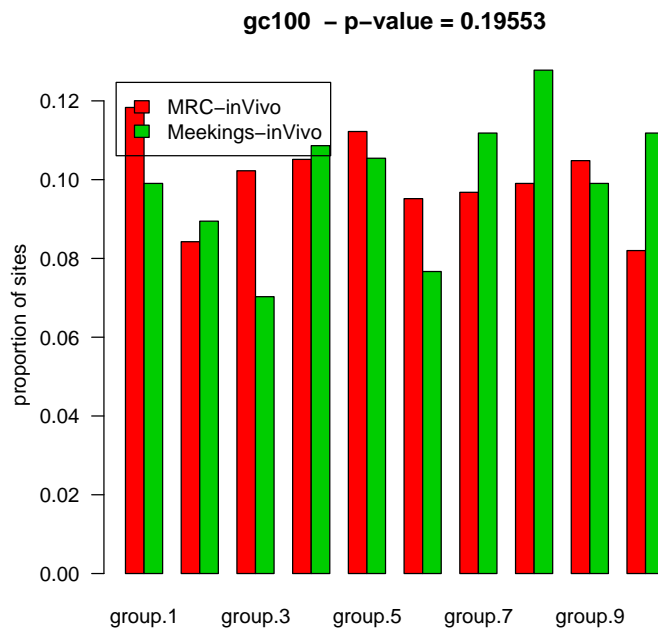

Category limits

|    | lower | category | upper |
|----|-------|----------|-------|
| 1  | 0.056 | group.1  | 0.308 |
| 2  | 0.308 | group.2  | 0.340 |
| 3  | 0.340 | group.3  | 0.364 |
| 4  | 0.364 | group.4  | 0.388 |
| 5  | 0.388 | group.5  | 0.408 |
| 6  | 0.408 | group.6  | 0.436 |
| 7  | 0.436 | group.7  | 0.460 |
| 8  | 0.460 | group.8  | 0.492 |
| 9  | 0.492 | group.9  | 0.528 |
| 10 | 0.528 | group.10 | 0.820 |

|                | coef   | se     | z      | p         |
|----------------|--------|--------|--------|-----------|
| (Intercept)    | -2.510 | 0.0858 | -29.20 | 9.33e-188 |
| eval(the.gene) | 0.443  | 0.1190 | 3.73   | 1.94e-04  |

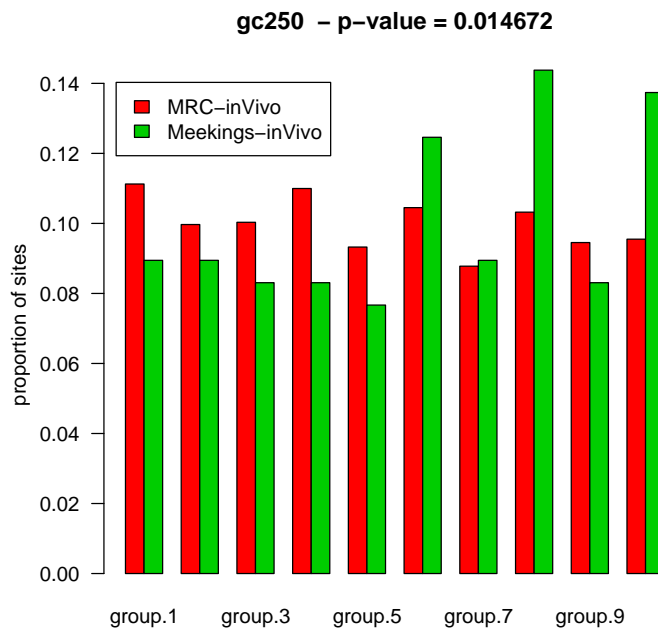



Category limits

|    | lower | category | upper |
|----|-------|----------|-------|
| 1  | 0.210 | group.1  | 0.316 |
| 2  | 0.316 | group.2  | 0.348 |
| 3  | 0.348 | group.3  | 0.370 |
| 4  | 0.370 | group.4  | 0.390 |
| 5  | 0.390 | group.5  | 0.408 |
| 6  | 0.408 | group.6  | 0.430 |
| 7  | 0.430 | group.7  | 0.452 |
| 8  | 0.452 | group.8  | 0.478 |
| 9  | 0.478 | group.9  | 0.516 |
| 10 | 0.516 | group.10 | 0.818 |

|                | coef   | se     | z      | p         |
|----------------|--------|--------|--------|-----------|
| (Intercept)    | -2.510 | 0.0858 | -29.20 | 9.33e-188 |
| eval(the.gene) | 0.443  | 0.1190 | 3.73   | 1.94e-04  |

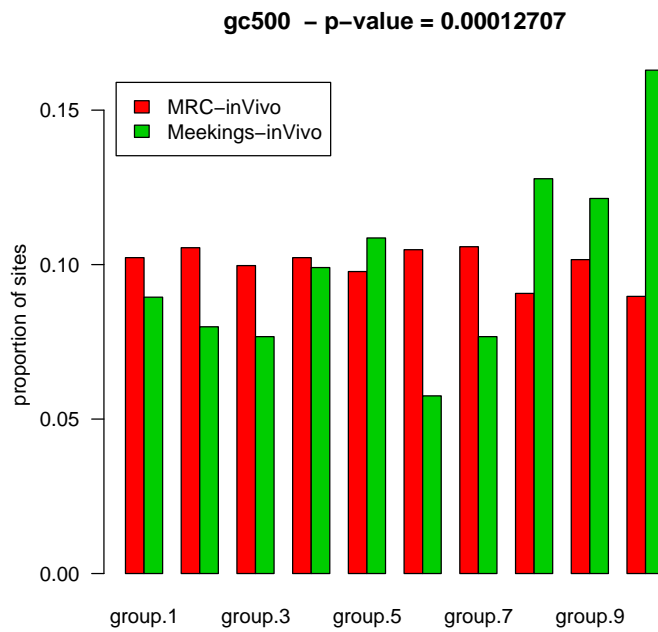

Category limits

|    | lower | category | upper |
|----|-------|----------|-------|
| 1  | 0.228 | group.1  | 0.330 |
| 2  | 0.330 | group.2  | 0.353 |
| 3  | 0.353 | group.3  | 0.373 |
| 4  | 0.373 | group.4  | 0.389 |
| 5  | 0.389 | group.5  | 0.406 |
| 6  | 0.406 | group.6  | 0.423 |
| 7  | 0.423 | group.7  | 0.443 |
| 8  | 0.443 | group.8  | 0.469 |
| 9  | 0.469 | group.9  | 0.506 |
| 10 | 0.506 | group.10 | 0.751 |

|                | coef   | se     | z      | p         |
|----------------|--------|--------|--------|-----------|
| (Intercept)    | -2.510 | 0.0858 | -29.20 | 9.33e-188 |
| eval(the.gene) | 0.443  | 0.1190 | 3.73   | 1.94e-04  |

**gc1000 - p-value = 5.7214e-07**

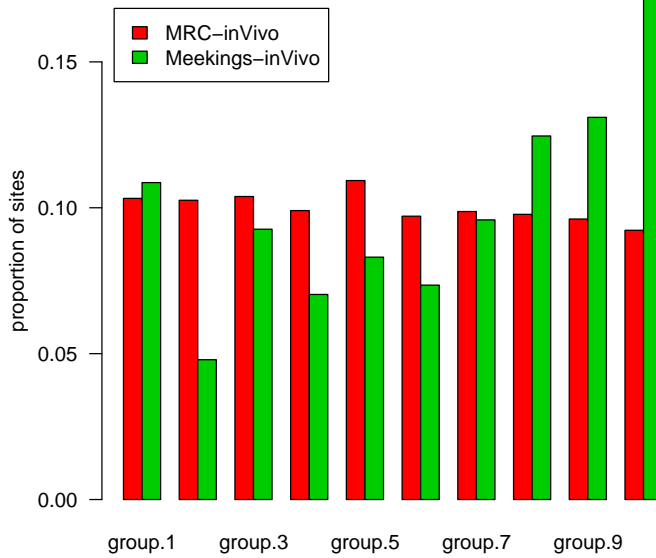

Category limits

|    | lower  | category | upper  |
|----|--------|----------|--------|
| 1  | 0.2460 | group.1  | 0.3370 |
| 2  | 0.3370 | group.2  | 0.3580 |
| 3  | 0.3580 | group.3  | 0.3730 |
| 4  | 0.3730 | group.4  | 0.3865 |
| 5  | 0.3865 | group.5  | 0.4015 |
| 6  | 0.4015 | group.6  | 0.4195 |
| 7  | 0.4195 | group.7  | 0.4415 |
| 8  | 0.4415 | group.8  | 0.4645 |
| 9  | 0.4645 | group.9  | 0.5019 |
| 10 | 0.5019 | group.10 | 0.7275 |

|                | coef   | se     | z      | p         |
|----------------|--------|--------|--------|-----------|
| (Intercept)    | -2.510 | 0.0858 | -29.20 | 9.33e-188 |
| eval(the.gene) | 0.443  | 0.1190 | 3.73   | 1.94e-04  |

**gc2000 - p-value = 3.4973e-08**

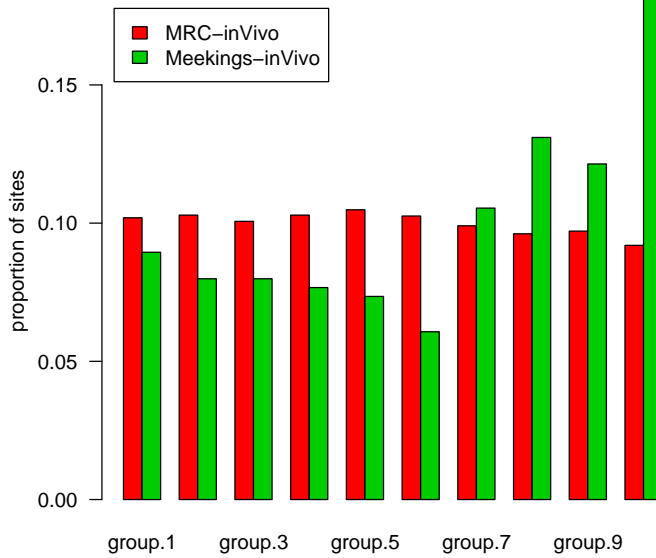

Category limits

|    | lower   | category | upper   |
|----|---------|----------|---------|
| 1  | 0.27340 | group.1  | 0.34464 |
| 2  | 0.34464 | group.2  | 0.36260 |
| 3  | 0.36260 | group.3  | 0.37572 |
| 4  | 0.37572 | group.4  | 0.38840 |
| 5  | 0.38840 | group.5  | 0.40160 |
| 6  | 0.40160 | group.6  | 0.41640 |
| 7  | 0.41640 | group.7  | 0.43588 |
| 8  | 0.43588 | group.8  | 0.45920 |
| 9  | 0.45920 | group.9  | 0.49796 |
| 10 | 0.49796 | group.10 | 0.66960 |

|                | coef   | se     | z      | p         |
|----------------|--------|--------|--------|-----------|
| (Intercept)    | -2.510 | 0.0858 | -29.20 | 9.33e-188 |
| eval(the.gene) | 0.443  | 0.1190 | 3.73   | 1.94e-04  |

**gc5000 - p-value = 1.9638e-09**

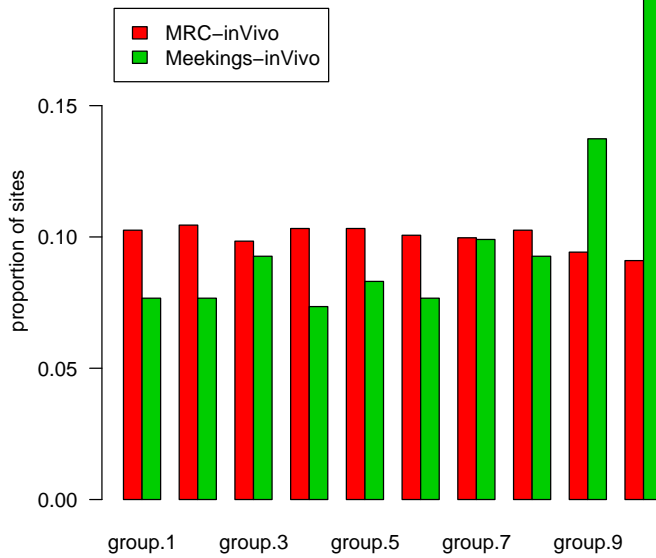

Category limits

|    | lower   | category | upper   |
|----|---------|----------|---------|
| 1  | 0.29850 | group.1  | 0.34920 |
| 2  | 0.34920 | group.2  | 0.36520 |
| 3  | 0.36520 | group.3  | 0.37676 |
| 4  | 0.37676 | group.4  | 0.38880 |
| 5  | 0.38880 | group.5  | 0.40100 |
| 6  | 0.40100 | group.6  | 0.41572 |
| 7  | 0.41572 | group.7  | 0.43270 |
| 8  | 0.43270 | group.8  | 0.45632 |
| 9  | 0.45632 | group.9  | 0.49310 |
| 10 | 0.49310 | group.10 | 0.64880 |

|                | coef   | se     | z      | p         |
|----------------|--------|--------|--------|-----------|
| (Intercept)    | -2.510 | 0.0858 | -29.20 | 9.33e-188 |
| eval(the.gene) | 0.443  | 0.1190 | 3.73   | 1.94e-04  |

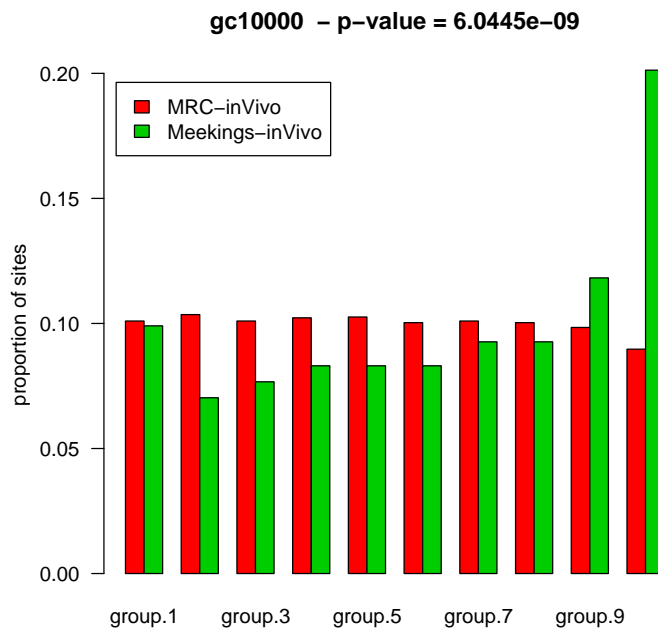

Category limits

|    | lower    | category | upper    |
|----|----------|----------|----------|
| 1  | 0.316240 | group.1  | 0.353720 |
| 2  | 0.353720 | group.2  | 0.366560 |
| 3  | 0.366560 | group.3  | 0.377064 |
| 4  | 0.377064 | group.4  | 0.388320 |
| 5  | 0.388320 | group.5  | 0.400320 |
| 6  | 0.400320 | group.6  | 0.414408 |
| 7  | 0.414408 | group.7  | 0.430816 |
| 8  | 0.430816 | group.8  | 0.454448 |
| 9  | 0.454448 | group.9  | 0.492464 |
| 10 | 0.492464 | group.10 | 0.650960 |

|                | coef   | se     | z      | p         |
|----------------|--------|--------|--------|-----------|
| (Intercept)    | -2.510 | 0.0858 | -29.20 | 9.33e-188 |
| eval(the.gene) | 0.443  | 0.1190 | 3.73   | 1.94e-04  |

**gc25000 - p-value = 7.8662e-07**

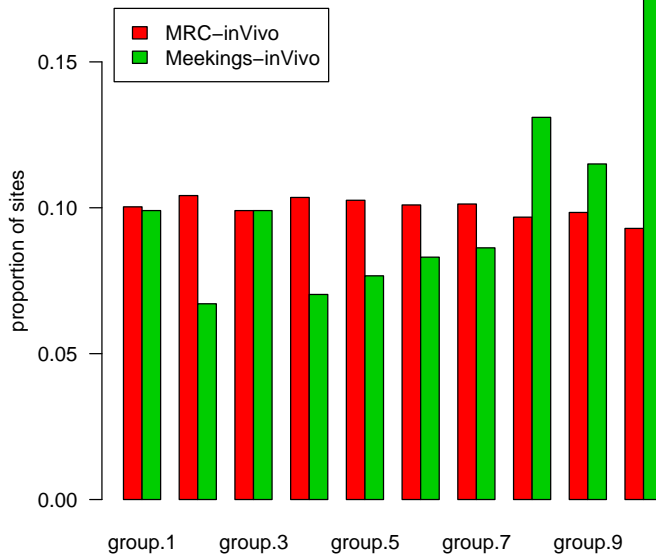

Category limits

|    | lower    | category | upper    |
|----|----------|----------|----------|
| 1  | 0.321620 | group.1  | 0.355196 |
| 2  | 0.355196 | group.2  | 0.367404 |
| 3  | 0.367404 | group.3  | 0.377936 |
| 4  | 0.377936 | group.4  | 0.388740 |
| 5  | 0.388740 | group.5  | 0.401840 |
| 6  | 0.401840 | group.6  | 0.414488 |
| 7  | 0.414488 | group.7  | 0.431584 |
| 8  | 0.431584 | group.8  | 0.452096 |
| 9  | 0.452096 | group.9  | 0.489072 |
| 10 | 0.489072 | group.10 | 0.632940 |

|                | coef   | se     | z      | p         |
|----------------|--------|--------|--------|-----------|
| (Intercept)    | -2.510 | 0.0858 | -29.20 | 9.33e-188 |
| eval(the.gene) | 0.443  | 0.1190 | 3.73   | 1.94e-04  |

**gc50000 - p-value = 1.3819e-05**

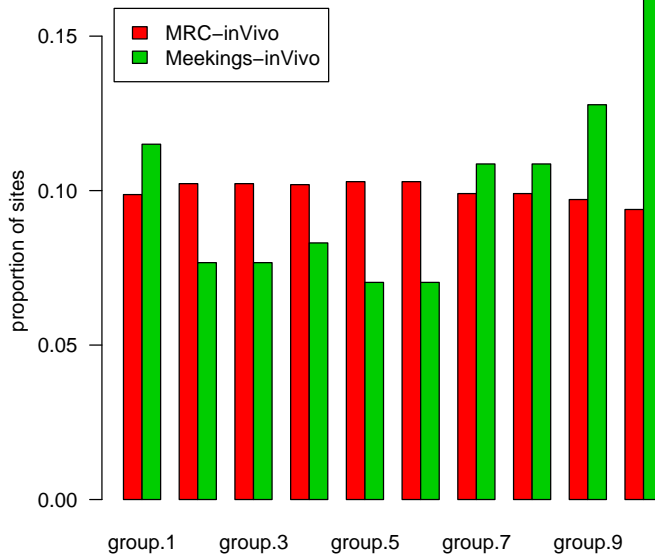

Category limits

|    | lower    | category | upper    |
|----|----------|----------|----------|
| 1  | 0.326490 | group.1  | 0.356060 |
| 2  | 0.356060 | group.2  | 0.368334 |
| 3  | 0.368334 | group.3  | 0.379076 |
| 4  | 0.379076 | group.4  | 0.388854 |
| 5  | 0.388854 | group.5  | 0.402000 |
| 6  | 0.402000 | group.6  | 0.415332 |
| 7  | 0.415332 | group.7  | 0.430426 |
| 8  | 0.430426 | group.8  | 0.450908 |
| 9  | 0.450908 | group.9  | 0.485204 |
| 10 | 0.485204 | group.10 | 0.623150 |

|                | coef   | se     | z      | p         |
|----------------|--------|--------|--------|-----------|
| (Intercept)    | -2.510 | 0.0858 | -29.20 | 9.33e-188 |
| eval(the.gene) | 0.443  | 0.1190 | 3.73   | 1.94e-04  |

**gc100000 - p-value = 0.00026947**

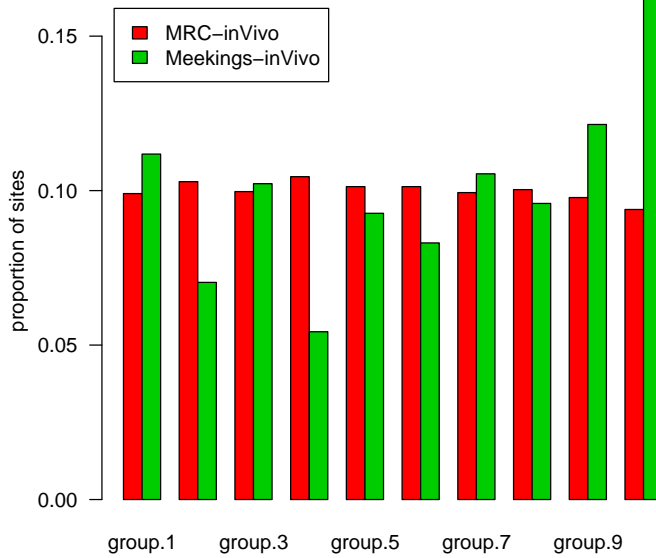



Category limits

|    | lower     | category | upper     |
|----|-----------|----------|-----------|
| 1  | 0.3327160 | group.1  | 0.3567352 |
| 2  | 0.3567352 | group.2  | 0.3693504 |
| 3  | 0.3693504 | group.3  | 0.3805856 |
| 4  | 0.3805856 | group.4  | 0.3906432 |
| 5  | 0.3906432 | group.5  | 0.4030120 |
| 6  | 0.4030120 | group.6  | 0.4152456 |
| 7  | 0.4152456 | group.7  | 0.4296512 |
| 8  | 0.4296512 | group.8  | 0.4500852 |
| 9  | 0.4500852 | group.9  | 0.4811648 |
| 10 | 0.4811648 | group.10 | 0.6238080 |

|                | coef   | se     | z      | p         |
|----------------|--------|--------|--------|-----------|
| (Intercept)    | -2.510 | 0.0858 | -29.20 | 9.33e-188 |
| eval(the.gene) | 0.443  | 0.1190 | 3.73   | 1.94e-04  |

**gc250000 - p-value = 0.0039688**

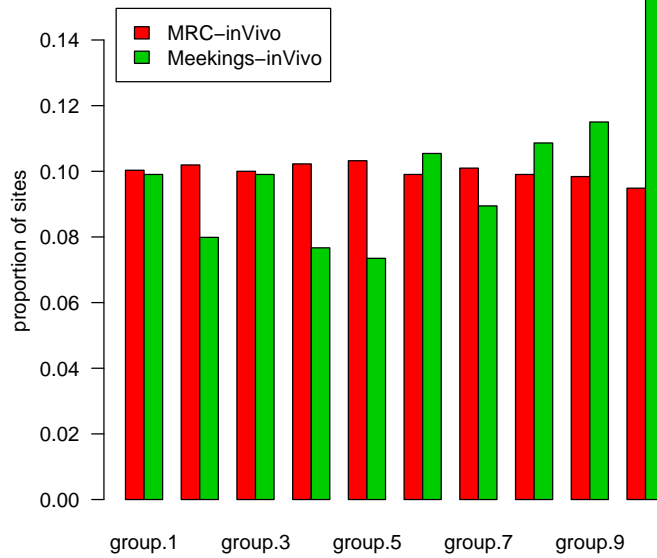

Category limits

|    | lower     | category | upper     |
|----|-----------|----------|-----------|
| 1  | 0.3360480 | group.1  | 0.3569236 |
| 2  | 0.3569236 | group.2  | 0.3706316 |
| 3  | 0.3706316 | group.3  | 0.3817764 |
| 4  | 0.3817764 | group.4  | 0.3916436 |
| 5  | 0.3916436 | group.5  | 0.4040080 |
| 6  | 0.4040080 | group.6  | 0.4155932 |
| 7  | 0.4155932 | group.7  | 0.4298860 |
| 8  | 0.4298860 | group.8  | 0.4494324 |
| 9  | 0.4494324 | group.9  | 0.4776624 |
| 10 | 0.4776624 | group.10 | 0.6081040 |

|                | coef   | se     | z      | p         |
|----------------|--------|--------|--------|-----------|
| (Intercept)    | -2.510 | 0.0858 | -29.20 | 9.33e-188 |
| eval(the.gene) | 0.443  | 0.1190 | 3.73   | 1.94e-04  |

**gc500000 - p-value = 0.0039919**

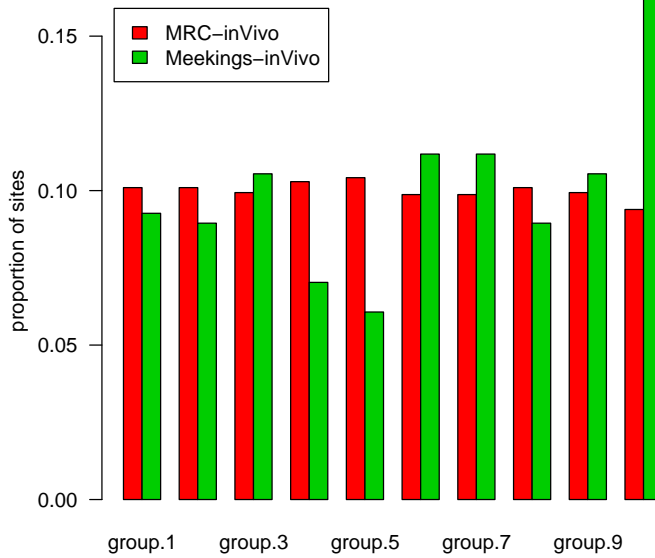

Category limits

|    | lower     | category | upper     |
|----|-----------|----------|-----------|
| 1  | 0.3373960 | group.1  | 0.3583892 |
| 2  | 0.3583892 | group.2  | 0.3712814 |
| 3  | 0.3712814 | group.3  | 0.3826826 |
| 4  | 0.3826826 | group.4  | 0.3934876 |
| 5  | 0.3934876 | group.5  | 0.4053140 |
| 6  | 0.4053140 | group.6  | 0.4158462 |
| 7  | 0.4158462 | group.7  | 0.4292004 |
| 8  | 0.4292004 | group.8  | 0.4478976 |
| 9  | 0.4478976 | group.9  | 0.4740026 |
| 10 | 0.4740026 | group.10 | 0.5973310 |

|                | coef   | se     | z      | p         |
|----------------|--------|--------|--------|-----------|
| (Intercept)    | -2.510 | 0.0858 | -29.20 | 9.33e-188 |
| eval(the.gene) | 0.443  | 0.1190 | 3.73   | 1.94e-04  |

**gc1000000 - p-value = 0.015963**

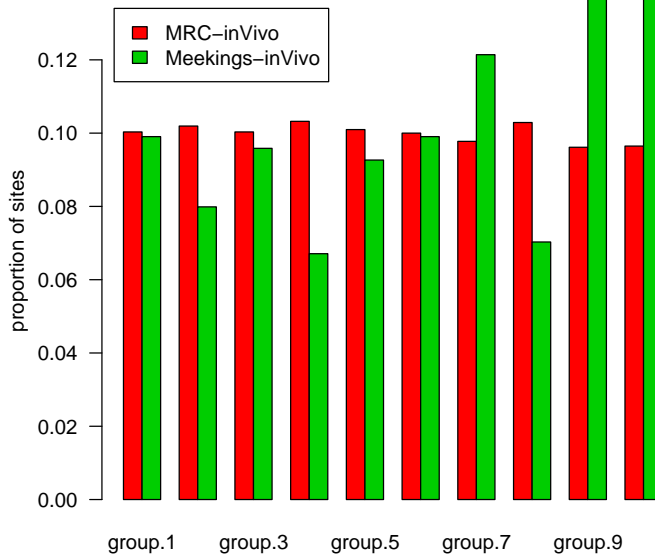

Category limits

|    | lower     | category | upper     |
|----|-----------|----------|-----------|
| 1  | 0.3431200 | group.1  | 0.3655166 |
| 2  | 0.3655166 | group.2  | 0.3761426 |
| 3  | 0.3761426 | group.3  | 0.3867794 |
| 4  | 0.3867794 | group.4  | 0.3959494 |
| 5  | 0.3959494 | group.5  | 0.4050850 |
| 6  | 0.4050850 | group.6  | 0.4157468 |
| 7  | 0.4157468 | group.7  | 0.4275466 |
| 8  | 0.4275466 | group.8  | 0.4428030 |
| 9  | 0.4428030 | group.9  | 0.4676686 |
| 10 | 0.4676686 | group.10 | 0.5723870 |

|                | coef   | se     | z      | p         |
|----------------|--------|--------|--------|-----------|
| (Intercept)    | -2.510 | 0.0858 | -29.20 | 9.33e-188 |
| eval(the.gene) | 0.443  | 0.1190 | 3.73   | 1.94e-04  |

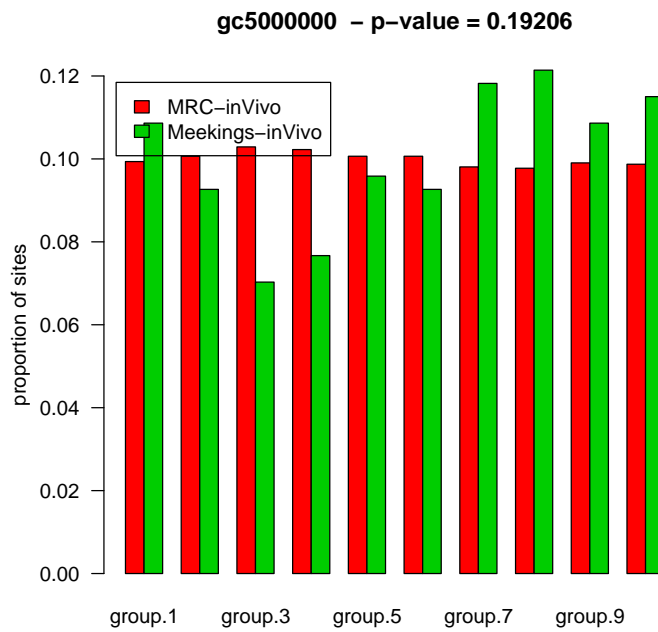

Category limits

|    | lower     | category | upper     |
|----|-----------|----------|-----------|
| 1  | 0.3465080 | group.1  | 0.3689412 |
| 2  | 0.3689412 | group.2  | 0.3792824 |
| 3  | 0.3792824 | group.3  | 0.3888328 |
| 4  | 0.3888328 | group.4  | 0.3972814 |
| 5  | 0.3972814 | group.5  | 0.4061530 |
| 6  | 0.4061530 | group.6  | 0.4149304 |
| 7  | 0.4149304 | group.7  | 0.4239636 |
| 8  | 0.4239636 | group.8  | 0.4396482 |
| 9  | 0.4396482 | group.9  | 0.4606730 |
| 10 | 0.4606730 | group.10 | 0.5545020 |

|                | coef   | se     | z      | p         |
|----------------|--------|--------|--------|-----------|
| (Intercept)    | -2.510 | 0.0858 | -29.20 | 9.33e-188 |
| eval(the.gene) | 0.443  | 0.1190 | 3.73   | 1.94e-04  |

**gc10000000 - p-value = 0.29282**

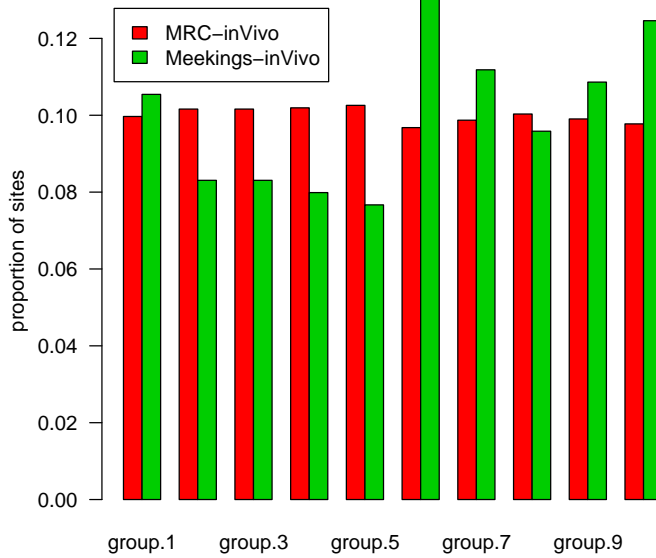

## 7 Cytobands

Here we study the association of cytoBand with insertion intensity. The data are obtained from

<http://genome.ucsc.edu/goldenPath/hg17/database/cytoBand.txt.gz>.

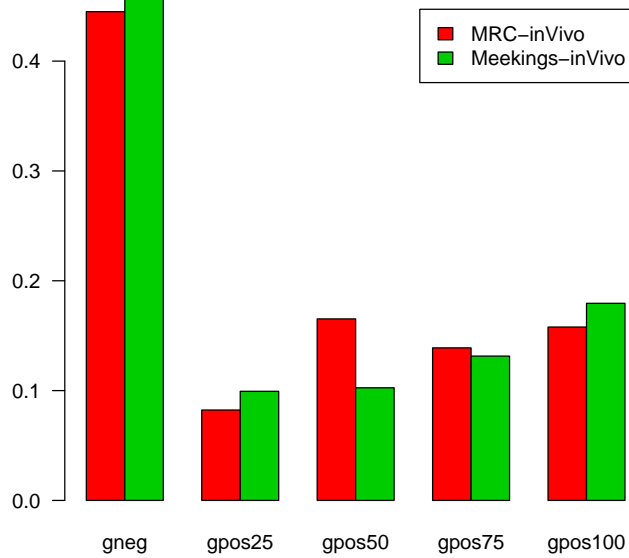

A formal test of significance attains a p-value of 0.044387.

## References

- [1] P. McCullagh and John A. Nelder. *Generalized linear models*. (Chapman & Hall ltd, 1999).
- [2] Xiaolin Wu, Yuan Li, Bruce Crise, Shawn M. Burgess “Transcription Start Regions in the Human Genome Are Favored Targets for MLV Integration,” *Science*, **300**(5626), (June 2003): 1749-1751.
